# Supplementary material
Source: PubMed Central journal article supplement (PMC3119311)
Supplement: supp_138.14.3067_DEV062141FigS1.pdf [file supp_138.14.3067_DEV062141FigS1.pdf]

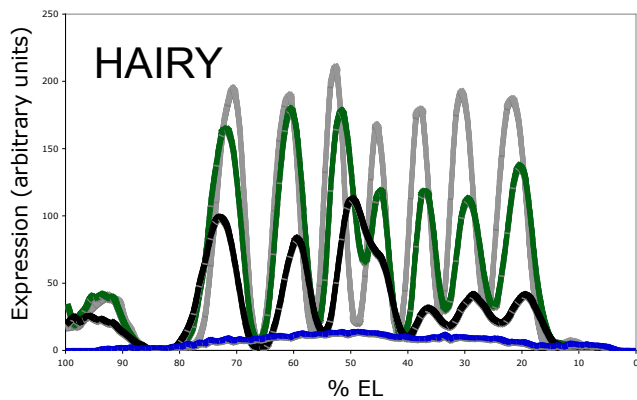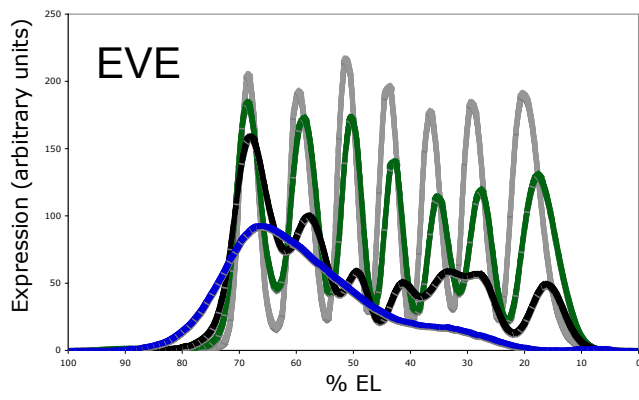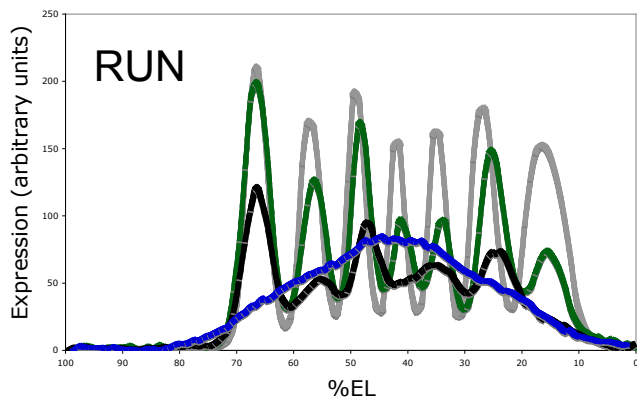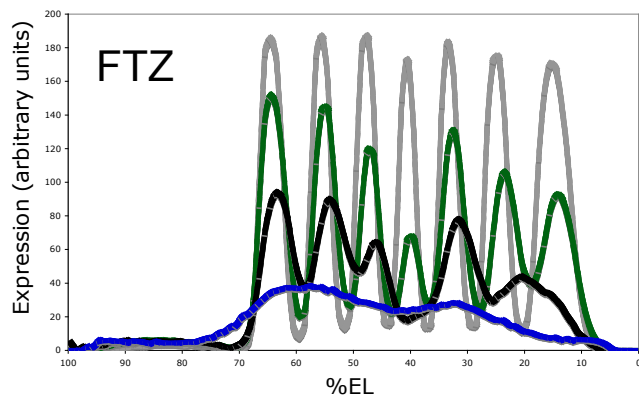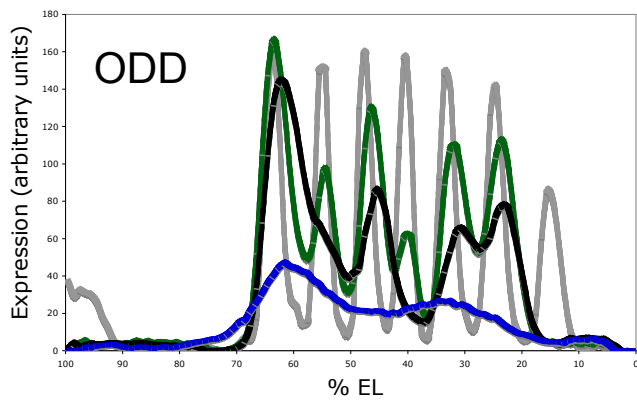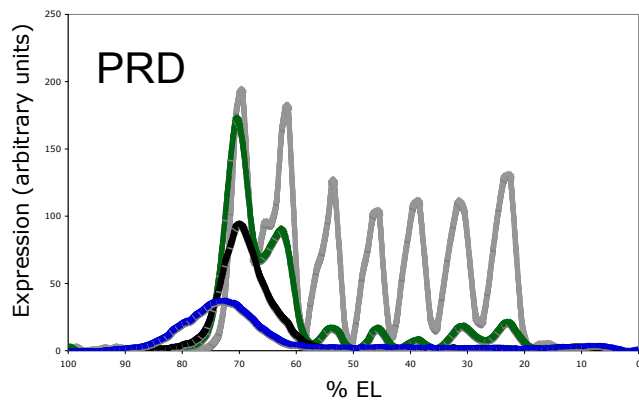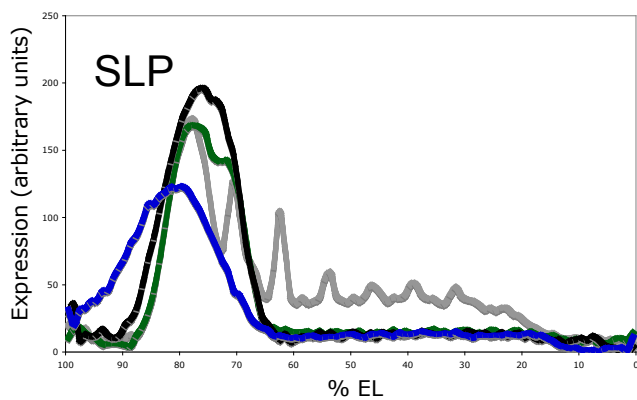

- T1, corresponds to transcript patterns prior to phase 1
- T3, corresponds to transcript pattern at phase 1
- T5, corresponds to transcript patterns at phase 2
- T7, corresponds to transcript patterns at phase 3
