# Supplementary material
Source: PubMed Central journal article supplement (PMC3119311)
Supplement: supp_138.14.3067_DEV062141TableS1.pdf [file supp_138.14.3067_DEV062141TableS1.pdf]

**Table S1. Sequences of cis-elements analyzed in this study**

```

>h_stripe1 Howard_Development_1990
GAATTCAGGGAAGTGTTCGGTTCGTTTTTTACGCAATGCCATGTAACGTCCTGCTGGTTTG
TTGTTTTTTCTTTATGGGAGCGAGTTGACTTTTTTAGAGAAAATATGAGGGAGGAGCG
GGCATTAAAAAAGGGAGTCAAGGAAAAGGAAAACAGCAATACCAGGAAATCCTAAAAGT
AAAAAAGAAACCGAAAAGTATTCGTATGTACTTGGCCAAAAGAGCCGTTCCGCATCGCT
CTCTTTGCTAAAATCCTCTCCAGAAGTCAAGTTTCAACGGGTTAACTTGGTCCAGTGGCG
TGTGAGCTACGTCTAACCTATGTATATAGATATAGATATAGATATAGATATAGATATAGAT
AGATAGACAGGGATAGAGGTATACCTGCACCCACCACGCCATAATCCTTTTATGGCAA
TAAACAAAACACGTCACGGCGACTCAGTCGCGAAGGATGGCCATGGCTAGGTAAGAAAGTG
CCAAAAGGGTGAATAAACCGGGTTGAGATGGCCAAAAGGGTATGGCCACGGTATGGCATG
GTTATAGATATGGAAGGATAGGGAAGAGTTGTTGCACACGCGGGTGGCATTGTTGCACA
CTCGTTTTTATGGGTGTGTGGTTTTAGCCCTTTGATGGGCATGATCATCCTGTTAATAGA
AAGCGTGGAAAACCGTTGCAACTTGTAAACCTACCTGCACGCCAACCAATCTCTAATCC
TTTCGCGCGCATCCTGAACCTTTTCGGTCCAGCTCGTTGGAGGGGGCGAGCGTGTCT
AAGCGGATTTAATTAACCGGTCGCAACTAAGCCACCGAATACCAGGACATGGCTTAAAT
CGGAACCTTTTCGCTCGGCCAGGAGGAGTGGCCCTGCTAAAAGCCATCCGGCTACTGTT
CCGAGGACGGTTAAGGATGCATGGATGCAGTAGCTACGTGGGCGTCATCGGAAAAGTCA
GACAGGGAGCGGGTGGGGCGAAGGATTTGACTTCCAGCGAAAAGGATTGCCGGACTTAACT
TTCGGAAAACCTCAATATTTACCAAATACCAAAGGGCCACCAAGTGCACCTTTGTTCCAGC
ACTTGGCCAGCAGTCGAAAAGTCAAGTCTGGTTTTGGGATTTCAACAGCAAATTAACCGG
CTGAGCCGGCAAAGCGAGGATCCACAAGGCATTGAGAAAATACCCATATCTGAGGGATTAG
AAAACATTTAGCTCCCTTTGTGGCCTCAAATTTGGGTGACATTGAAAGATAACAAATGA
GTTTTATGTTGATTTTAAATATTTTCA

>h_stripe1+5 Howard_Development_1990
GACTTGGTGGTACCGCCCTCCACCAACTGCATCCCTCAGCTCCCTCAGCCCCCTTGAACC
TTCAACTCCCCCGCGCATTTATGATCGATACAGAGCCGATTTCTTTGAGGGTGCCTTT
TGTGATTTGCTCGTTCGGTTTGGTTGGATCATCGGATGCTGAGTTGCCGGTGTGTG
AGCTCCCCAAGTATCTGCTCCTTTCACGCGATTACCTTGTAGGGGGCAGGATGTACAC
TTCTATCAGCAGGGTCAATTGAGTTGACGCAATGTTTTGAATGCTATAAAAGGGAACATA
TTCCCTTTTGTATGCTTAAATACCAAGATTATTAAGAATTACTAAGGATAGATCATCGC
ATCTTCAAGATACTTCTATCCAGGCAAGGGTATTTTTAGTTCGTGTCGATCTGTCATT
TCGTGACCCAGCAGTATAGAGCATCGACACCTTCAATTTGGGGCTGCTGGTGGGAGAGCT
TTTCGGGAAAACCTGGGATCTGGCATCTTGAAGTCTGGGGCGGATGGTGTGTATGCGGCCA
TGTCTGGGTCTGGTACAGATTTGTTGGGACTCGTAAAACATTTTATGACCTCAACGACG
ACTAAGACGACTGACGATCATCTATACACATCGATCCGCGTGCACCTTCTGCTGTTCCGCA
CTCGATTGCCTTTGTTCTCGCTGAGTTCGCCAGCCCGTTTTAATGGCATTTTTGCATTTT
TGTGTTTTCTGTTCCAGCTACCAAGCAGAACGCCCACTCGGTGGGAACTCAATTTTATCT
TATTTTTTTTTTTTTTTTTGATTTTTAGCACTGCTGCCAAACACATCCTGTCTATTAGGGAA
ATATTTATGTAGATATCGGCTGGGATCGAAGTGTTCGGGAGGAGCAGCTGCCTCCTAAGC
GTGCCCCAATCAGGGGAGTCAAATTAAGTCCCACATAAATTAACCAAGTTTTTTGG
GACCAGCAGATTTTATTTGGGCATTAGCGGCTGCTTTGAGCTCCCTTTTATAAGCTATC
TTCCTTTTATTTTTTCTTCCAGCGGCGATTAGCCAAATTTATGCAGAGCGCCCTCTGGCG
TTGGCGAAATGATATCCCGGAAATTGGCAAGGATTCGTAATCGGCCGAAAGAGGAGAGG
GAATGAGTTGCCGGGTGCGTGGCGTGTGGCATGGCGTGTCTGTAATAACTCTTTGCGAA
TCAGGCAGCGGCGAGCGGTTCCGCATCGGCGGATTTAGCCATCAAGGCCATGAAAAGACATT
AGCTTGGTGGATCGTAAAATCCTGAACAACGGACACAGAGGTCTAATCCGTGGAAACTC
TAAACTTATCCAGAGAGAACCTCTTTTCGGCGGAGACTACTCAGTTAGTTGGCTAGGT
AAAAGCCGTAGAACTCTTTCCACTCTTTCCCGATTCCCAGATCGCCGAGCCGTACCTGTC
CTGCGTGTTTGACGTTTTGTCGCCCAATTGATTTGACATTGAAGGCTCTCTACCGTCAAAT
AACCTAAATAAAACATAAAATCCTTCTGCATGCTGCGAACCCATCCATCGAAAGATCC
TCACCTTGAGCCACCCGATCTAAGGTTTGTTTTTTTTTTCTTCACTTTTGTGACGCGTT
TTTTAGCCGAACCTGTAATATGTAGGAAATCATTTTTTATGCAATTCGTTGTCAACGACT
TTTGAGAATTCAGGGAAGTGTGCGTTCGTTTTTACGCAATGCCATGTAACGTCCTGCTG
GTTTGTGTTTTTTCTTTATGGGAGGCGAGTTGACTTTTTTAGAGAAAATATGAGGGAG
GAGCGGGCATTAAAAAAGGGAGTCAAGGAAAAGGAAAACAGCAATACCAGGAAATCCT
AAAGTAAAAAAGGGTGAATAAACCGGGTTGAGATGGCCAAAAGGGTATGGCCACGGTATG
GCATGGTTATAGATATGGAAGGATAGGGAAGAGTTGTTGCACACGCGGGTGGCATTGTT
GCACACTCGGTTTTATGGGTGTGTGGTTTTAGCCCTTTGATGGGCATGATCATCCTGTTA
ATAGAAAAGCGTGGAAACCGGTTGCAACTTGTAAACCTACCTGCACGCCAACCAATCTCT
AATCCTTTCCGCGGCGATCCTGAACCTTTTCGGTCCAGCTCGTTTGGAGGGGGCGAGCG
TGTCTAAGCGGATTTAATTAACCGGTCGCAACTAAGCCACCGAATACCAGGACATGGCT
TAAATCGGAACCTTTTCGCTCGGCCAGGAGGAGTGGCCCTGCTAAAAGCCATCCGGCTA
CTGTTCCGAGGACGGGTTAAGGATGCATGGATGCAGTAGCTACGTGGGCGTCATCGGAAA
AGTCAGACAGGGAGCGGGTGGGGCGAAGGATTTGACTTCCAGCGAAAAGGATTGCCGGACT
TAACTTTCCGAAAACCTCAATATTTACCAAATACCAAAGGGCCACCAAGTGCACCTTTGT
TCAGCACTTGGCCAGCAGTCGAAAAGTCAAGTCTGGTTTTGGGATTTCAACAGCAAATTA
ACCGGCTGAGCCGGCAAAGCGAGGATCCACAAGGCATTGAGAAAATACCCATATCTGAGGG

```

```
ATTAGAAAACATTGTAGCTCCCTTTGTGGCCTCAAATTTGGGTGACATTGAAAGATAACA
AATGAGTTTTATGTTGATTTTAATATTTTTCA
>h_stripe2+6 Howard_Development_1990
GAATTCAGTTTCATCCGAGTGGCCGAATCCATTGAGTTCGCCGAAAATCCGCGTCATGGT
TAAACGCGACTAATCTTCCCCTTAAAGCCCTTCGCAGCGACCTGAAACCGGTTCCAGTTCAC
GGCAGTTCAGTTCGGTGGGCGTTTGTGTTAGTTTCGAAATCAAATAATAGCAAACACG
CTGAAGGAATACGGCTGAAAGGAAAAATGTGCAAGGATTAAGCCGAACACATCCTTTTCG
CAACCTTGGACCTTCCACGTTCCGCGCACACGCTCGCAATTTTACGACTTTCCTTAACC
CGAATGCGATTTTCGATTCCGACTTTGGCGAAAAACGCATGCCAAGCGCATGTCTTGGCAC
GATCCTAAGATCTCGATTGTTTTCGTCCTAAGAGTTGACTTTCGTTTTTAACTCGTCCC
GTGCCGAAGGACAATCTTTGCGGATTTGCCCAATGTTCGGGTGTCCTCGACTCCTTTTTT
TTGCCAGAGGGTTACGGTCCATTTGTGTGGCGATTGTCCGCTCCCCTTTGTGGCGAATTT
CGACCCGGGATCGCAGTTTTTTACGATCCTCAACGGGTTTTACGACCTCCGTCGTTTTT
TAAGCCTTTTCTGCTCTGCCATCCTCTGACCCGTTCAAGTTCAAATCAGTTCGGTGTCAACT
CTTTCCGGTTTCATAGCGGGTTGAAAAATCCGGCTGGAACAATAAGTTTTTAGCAGA
TTCCGGGAAGTGTGTAGCGATTTTTTAAAAATGTTTTTTTTTTTTTGTTTTTTTAGAAAT
GCAATCTTTATTTTGGCAAATTGTAGGAACTTAAGCGGAATTTATTAGGTTTTCTCGGAAT
TTCACATTTTTTGTATTAGGCAAAGGCTTAAAAAACAGCCCGCAACCTTGGTGTAAAT
GAGATGGATAGATAAAGAAGATGTCCTTAGGAACTATCTTTTTAAGTCGAAAAGCCAAA
AAGTCAAATGCGATTTTTTTATGGGAACAAGACAAAAAGGGTTTTGCGGAGATATCACGT
GGCGTGTATCAGTTTTTTTTTCCGACATGTTGTGAACCTACAAGACGATCATAAAGT
A
```

```
>h_stripe3+4 Howard_Development_1990
GCCTGTCTTGGACCACTGCTGCTGTGCTGAAATCCTAATGAGTGGCGAAGGAAGA
AAAAAAAAATGTTACATGTCTGATGATCCATAGATGGGCGGAAAAAGTCCGATATGCG
ACGAGATTTTTGCGTAATTTCTCAAGGCCAGACAGGGACAACATAAAAAGGACGAATTC
TTACGTAAGTGACCGAAATATGTTTTTATGAGAGGATCATAAATTTTTTTCCCCTAAGA
ATGGGAACCGCTTCTCGTTCTCTGATCTCAATGTTCTGATCTCGTTCATTTTTAGCCGA
ACTGTCGCGCAGTCCGATGTCTTTTTCGACCGCTCACGGCATGACATAATTCGCATA
ATTTGCAACAATCTCGAAGGACTTTTCCGCCCCAACACCGACACCACCAGCACGTG
ACAAAAAAGATGAACAAAAAAGAGAGCGACCTGCTCGCAGATTTTTAGTGCGAAT
CCGCAAGTCAATCGCCGAATTTGGCCAACAACCTTATGAATCTGCATATTTTGGCAATAG
CGCAGTCTGCTGCTGCTGACATGTTCCCATTTTTGTCTAATATTTTTTATGAGTT
CAGTGCACGCGCAAATTTGTCGCACTTCTTTGTGGCCACCCGCAAGACGTGTTTTCTA
TAGATTTTTCGCATGTTTTGGGGTTTTTGTTCATTATCATGATTTTTATTTGCCCGAG
CCCTGTGTTCTTTTTGGCCCTGTTTTCTTTTTGTGGTTAGAAGTGGACCCAATTTTTTA
CCTAATAAATTTGTCAAATTTTTGTGGTTTTGGGCTGTTTCAGAGACCCTGTTCTGAATTA
GGGCCGAAACAGTCAATCTGGACTAGGTAGCAGCTGTAAAATTAGAAGTATAATGAG
GGCTACGCAAAAT
```

```
>h_stripe5 Pankratz_Cell_1990
CCGCCCTCCAACTGCATCCCTCAGCTCCCTCAGCCCTTGAACCTTCAACTCCCC
CGCCATTTATGATCGATAACAGAGCCGATTTCTTGGGCTGCCTTTGTGATTGTGCT
CGTTCGGTTTGGTTGGATCATCGGATGCCTGAGTTCGCCGTGCTGTTGAGCTCCCCAAGT
ATCTGTCTCTTTCGACCGGATTACCTTGTAGGGGGCAGGATGTACACTTCTATCAGCAG
GGTCAATTGAGTTGACGCAATGTTTTGAATGCTATAAAAAGGGAATAATCCCTTTTTGA
TTGCTTAAATACCAAGATTATTAAGAATTAAGATAGATCATGCGATCTTCAAGATA
CTTTCTATCCCAGGCAAGGGTATTTTTAGTTCGTGTCGATCTGTCATTTTCGTTGGACAGC
ACTGATAGAGCATCGACACCTTCAATTTGGGGCTGCTGGTGGGAGAGCTTTTCCGGAAACC
TGGGATCTGGCATCTTGTGTCGCGGGCGATGTTGTTGTATGCGCCATGTCTGGGTCTG
GTCACGATTTGTTGGGACTCGTAAAAACATTTTTAGCACCTCAACGACGACTAAGACGACT
GACGATCATCTATACATCGATCCGCTGCATCTGCTGTTCGCGACTCGATTGCCTTT
GTTTCTCGTGTGAGTTCCGCGAGCCGTTTTAATGTCATTTTGTGTTTTGTGTCTCTGTT
CCAGCTACCAAGCAGAACGCCACTCGGTGGGAACTCAATTTTTATCTTATTTTTTTTTT
TTTTTTGTATTTAGCACTGCTGCCAAACACATCCTGTCATTAGGGAATAATTATGTAG
ATATCGGCTGGGATCGAAGTGTTCGGGAGGAGCAGCTGCCTCCTAACGGTGCCCCAAATC
AGGGGCGTCAAATTAGTCCCCACATAATTAACCTCAACAAGTTTTTGGGACAGACGATT
TTATTTGGGCATTAGGCGCTGCTTTGAGCTCCCTTTTATAAGCTATCTTCTTTTTATT
TTTTCTCAGCGGCGATTAGCCAAATTTATGCAGAGCGCCCTTGGCGTTGGCGAAATGA
TATTCGGGAAATTTGGCAAAGATTTCGTAATCGGCCGAAGAGAGGGAATGAGTTGCC
TGGGTGCGTGGCGTGGTGGCATGGCGTGTGTAATAAATCTTTTGCGAATCAGGCAGCGGC
AGCGGTTTCGCATCGCGGTATTAGCCATCAAGGCCATGAAAGACATTAGCTTGGTGAT
CGTAAAATCCCTGAACAACGGACACAGAGGCTAATCCGTGGAAACTCTAAACTCTATCC
CAGAGAGAACCCTTTTCGGCGCGAGACTACTCAGTTAGTTGGCTAGGTAAGCCGTAGA
ACTCTTTCCACTCTTTCCGGATCCCCGATCGCCGAGCCGTACTGTCTGCTGTTGTA
CGTTTGTCCGCCAATTTGATTTGACATTTGAAGGCTCTCTACCGTCAAATAACCCTAAATAA
AACATAAAAATCCCTCTGTCATGCTGCGAACCCTCAATCGAAAGATCTCACCTTGAGCC
ACCCGCCATCTAAGGTTTTGTTTTTTTTCTTCACTTTTTTTGACGCGTTTTTTAGCCGAAC
TCGTAAATGTGAGGAAATCATTTTTTATGCAATTCGTTGTCAACGACTTTTGAG
```

```
>h_stripe7 Howard_Development_1990
GAATTCGCGAGTTCATCGCCGAATTTGGCCAACAACCTTATGAATCTGCATATTTTGGCA
ATATGCGGAGTCGCTGCTGCTGACATGTTCCCATTTTTTGTCTAATATTTTTTAT
GAGTTCAAGTGCACGCGAAAAATTTGTCGCACTTCTTTGTGGCCACCCGCAAGACGTGTTT
TTCATAGATTTTTGCGATGTTTTTGGGGTTTTTGTTCATTATTTTTTATTGCC
```

CCGAGCCCTGCTGTTCTTTTTGGCCCTGTTTTCTTTTTTGTGGTTAGAAAGTGGACCCAAT  
TTTTAGCTAATAATTTGTCGAATTTTTGTGGTTTTGGCCCTGTTCCAGAGACCTGTTCTGA  
ATTTAGGGCCGAAACCACTCAATCTGGACTAGGTAGCAGCTGTTAAAATAGAAGTGATA  
ATGAGGGCTACGAAAATCGATAATCTTTTTTATATAAACTTTTTTTTTTTTATTCTAT  
CAAGATTAAGATTTTTCAGCTGTTTTTAGTATTTTTCTCCGAAAGAGTGTCACTCCTT  
CTACTTTAACTCTCGCTCTCAGTTTGCCTTTTACCTTTTCGACTAATGATCAACTTTAAC  
GTTTGCTAATGACAACCTGGCCAGAATCGGTCCACCTTTAGCCTTGACAAATCGCCGTGGC  
TTGGTGACAGATGAGGAGTTTTAACTCAGCTTGAACCGAAACCTAAAACCTAAAACCTC  
ACCATCATGTCAACACTTTCCCTGCCAACCATAAATACTCGAAAAACCCATAAAATCACT  
GAAATTCAGACGAGAGCCGGGCGAAACCTTTGCCACAATTAATAATGTTAACTGGAGTA  
AATATCATAAAAGCAATAAAATCCCTTAGACGCTAAGAGAATGCTCTACTTAAGCCGA  
AAAATGCGTTGCTCAAAAACAAATTTCCAAAAAGTTGCCTCAAAGCAAAGCAAGACTAATT  
TTTAACAAAAGCAGAAAACACAAAACCTCGAGTCAGTTCTTCCGGGAACCCAGGAACT  
ATCCGTTCAAGGTCACCAAAGGTTCTGTGAGGATCTGGAACGAACACCCGAACTAGGTC  
ACTGGATCGTTGGGCACAAAAACGCACAATGCCGGCAATAAAAAAGTAGAGCGCATCG  
CAGGACATCATTGCTCAGCCGAAACCTTTCTCGGGTTTTACGATACAGAGCTGCTTTT  
TGTGCTTTTTTTTTTTGGAACTTCTTCATAATTGTAGCAAAAAATTAGTGCACATCT  
TTAGAATTTACATAGAACTCGACCTTCGTTGACACTGCGTTTTAACTTTGATTGGCATC  
TTGACTGAGTTCGAAGGAGAAGGGGAAAAAAATGTAATAATGGTGGCGGAAAGGCTGGG  
TAATGGCTTTACAACCTGTTGTCTCTAATTATGGTCGAAATGGGCCGTAATCTTTGCTA  
AACGCAAGCAACAGACCCCGCTTTCCGCCAG

>h<sub>-15</sub> construct

ATCGCCTTGTGACATATGCGAAATTCATTGTCGCGTGTGCGTTGTCCTGGATGCCAAC  
GACTTGGCAACCACTTGGCTGACGGCAATCCGCTCAGATCCCATCTACCGTCTCCC  
ATATCCCCCATCCCGACACCCACAGCACTCCTCCATCTCTGGGGCATTACAGGTGCTG  
CTGCCAGATATGCACTGCACGAAAATAACTGAGGAATATAGATGAGTTTCATAATCAGAGA  
ATGCTGATAAATATGCTGAATATGAATATGTGCTAGTTATAAACCCATTTAACACAAAT  
CAATTAAGCTTTTTTTTAAAGCCTTCTCAATACAAATACCATATGAAATACGTAA  
TTTTTCCAGTGCAGTCAGCGGTAGTGCCATATCGCGACGGACATTATCGCGCTCGTCTT  
CGTTCGCTGGGCATTGAAAAATTGGCAATGTTTGGGACAGCGGCGAGAAACACAACCA  
GCCAATGAAAACAGCAACAGAAACGGACAGACTTTAACTGGCCGCTTAAACGATCGCTT  
AACCCTGTTAATCTGCGCGGATTGGTCTTTAAAACCGGACAGCGATAATAATACTCTG  
GTCCAAGGTTGAACGCCATTCTGTGCGTAAGTGAATTAGTGTAAATGATAATGAGCGAT  
GCCCCAGCAATTTGCCATAAGCATTTAATGTGTTGCCCATGCGGGGCGAGCACATGG  
AGGGGAACGGTGGGACCGGATCAGGTGGGTTTCGTATCCATGATGCAAGCTACGGACT  
CGGGCTCCACAGAGATAGGGCCACGCTCTGCAGCAACTGACGCACGCGGCCCTCATGTGA  
CCGAGATATAATGTGTGATACGTTCCGGTCTTACGCTCGAGTTCCGCGTCCGATGTC  
CGTTCGCCAACTTTAGACCTCCAACCGCACCATTTGAGTACACATTTCATTCAGCAGAAT  
TTTCCCGCAATGCCCATCCATGCCAACCCACGAAAAAAAACAACACACATCCG  
CAGCAGTTTTCTACTTCTCAATGAGCCAAATAGCAACCCGCTCTCTACGCAAACTTT  
GACGTGACATCCGAACCGTGAGCACACACTCTGGGTGGCGGGCAGTGTGGGGAAAT  
TGGGGCTTTTTGGCAAGGTAAGCGTGACCAAAATATGGGGAACAGAAAGTGGTTATGGG  
AACTTGTGCGCTCTGCAGAAATTTAGGGAAATTAGCACTTAATGCTTTATCATTTACA  
AATGTGACAGGGGAAATCTAGGTTGCCTTTGATCAGGAAGCCTTCTTTGTGAAATATCAC  
GTGGGCACGACAAAGTGTTCACAAATTAGTTATTCATATCCAGAATCTTACTTTTCAG  
AATAGAATCAAGAACTTAAAGGTTTCGCATCATTAATTTTTAAAAATCCTTAAATAT  
TAGCAACATTTAAATGAATGATAAATAACCACTCCAGAACGAAAAAGGATGCAAGCAGT  
TAGCGTGTTTAGCAGGTGCCGAGGCATTCTAATGACGCAGCACATCCCCGTTTCTCTC  
CTGCGACCTGCTCCACCATTCTCTGATTCCTCAGATTCAGTGCGCCAAGTCCCAGT  
GTTTGCACAACAACACGACGCCAAAGTGGTCCGCACTTGAGACGCTGATTTATGCACGAA  
ATGCTAATGGAAATGCAACTTCAAATGCTAATGCGGCGCAGGTCAAAGACTCGTCTTCA  
GTCTCAGACATCGGTCCACCTCCTCGTCTTCTFCGGCATCCAAGAAGGCATCGAGAAGA  
ACGAGAAGAACGGCGGGGGCTGAGAAGACAGAAGACAGTTCATCACAATTGCGTTTGCA  
AATCAACGAGGCGACAAGCGAAGCGCGCATGCGCAGCACAGAAGATTCAGATTGGATCG  
GAGGAGGGCCAAACCAACTGGTGGTGGTTGATGGCCGATGGCCGATGGCTCTGTCTCCG  
TGCCTCATTCATATGCAAAATCCGTCACGCTGGTGACCACAAATGAAATGCCAACACGCA  
GAAATGCAAGAGAGCATCGAATTGCAAAATATGGGGATGCCAGCTCGTTGACAAAAGTTG  
CGCTGAATAATTTCCACAGCTCTGTTAGAAGCGACAACCTTAGCGACTCCGAGTGCGAATA  
GGAATACGAATGCGACCCAGACACATACGCAAGAACCAGATACCAGATACCAGATCCAC  
GATCCAAGACCAAGCTTCAAGAGCGAACCAAGTCCCAAGCCCCAATAACCAAGGT  
AAAAGAAGCAAAAGCGCGTGCCTGCGGCTCAACTTCCGCTGCTGCAAGTGTGTTCCGCT  
TCCATGCGTACTATATCCACGGGATCAGGAGCGGACCGAGGTCGCCCTCCAATGGATCGG  
CACAGTCAGCAAAATATATGGGATAGCACACCAGAAACGAAACAAAAGAAAAAAATC  
AAAATAAATCCAGAAATAAGAGTCCCTGTTTGTGCAAGTTGAACAGTGAATTTGAAGTA  
CCAAATATGCAAAAGTGTTCAGGTCTCAATTCGGTTTAAAATACTCACATATATGTTTGT  
ATGCAATGAAAAAATGATAAATAAATAAATGAAACAACAAGCGTTTATTAAGTGGTATC  
ATTTTACTTGTGTACAATTGCGAACATAAAAACAAAGCTTGCATAATATATTTTTTGG  
CATTAATAAAGGTTTATATATTCGATGTTTGGATATGTATGTAGTTTCAGTCGAAAT  
GTTAATCAGTTCATTTGTACCCTTCTTATCGAATACAATTTAAAGGAAAAATTTGCATTT  
ACCCTGATTGATCCAGTTTGTTCATAAAAATTAACCAGATTTCTATACTTAATCTTTAGTG  
CATGCCCTTTCAAAATATAAACAATGTGCAATTTTTGATAATTTATTTTTAAATAAGCA  
AATGGGGGGTGTTCAGTAACTCCGCTCCTGGTGGATGGTCAGTGTGAGTGTGAGATGACTCC  
CCTAGAAGCTTTTCGAAACTAATGCCGAATGCAGGTCGGTTTCCGTGCTTACATTC

CAGTCGTTTTGTTGTCTTTTTCTGCTGCCTGGTTCCAGGAATCTGTGTGTGTTGTTG  
 GTGACGAACTTGGTTGCTCCATTAGCATATAGCCGGTGGAGTTCTTCAATGGGGGCGGG  
 AATGAGCAGAGCGGATCGCAGTGAACGGATGTGCGCTTGATTATGTTGTTTGCAGCGA  
 GGCTGCTCCCTCATCTGCTGCTCGAGATGACGAAGATTCTATGAGCGCCCTGCCTTCG  
 CGGACATTAATCATTCTTGTGTTTTGAATTCTTCTCAAGCAAACAGCGCGGACTGACGCC  
 AGGCGGTCCGGTACCAGAAAATGGTAGAGACAACAACACTATGTTTCGAACAAAATACGG  
 TGGCTATCAAAATAGCTACGTACACGTTTTAGCCACCCAAATGGTCAAGGGTTTCCTCG  
 GATCTTGATCTCTGTTTGTGCGATCACGATCACGCGTTGTCCGCGCTTGTTGTCCTAATG  
 CCTCGCCTTGTGCAAAATGTTTATCCAAGACAATCCCAAGCCCCGGGCCGATTTCAGGC  
 CGAAAGGATTTGTCTCGCTCGTATCATCAGCATTCCAGCATCGCCGGAATCATCATCC  
 GCATCGCATCGTCTGACGTCGCGCGGTTAATGTGAGGGCAAACAAGCGTATGTGGC  
 AATTGTCTGGGAGCGATCTGTCTGCGTGAAGTAGCAGACTTCTTGTCTTCCCCTAT  
 TTGCTAAGTAGCCCTTCCAGGAGAGGCTGTGCCGATCCCAAGGTGATAGTCCATTAG  
 CTACCAAGTCGAGCGGCCACACAGGAGTGTGATGACGATGAGCATACGGATTTTCAGGATCGA  
 AATGAGTGGGTGTAACCCGACTTTGAAGCTGACCGTTTTTAGGCAGAAGTCGAGGAAATG  
 CGAGAAGGATTGTGGTTTTCCGACAAGAGACTTCGCATGTACTTTCTAACGATTCAAAATG  
 GATATTTATTGAAGATGAAAACATACGCTCTAACTTAAGGCAGTACTAAGGTTATGGA  
 TTTTAGAATGTAAAACCTTAAGATAGCAGATGTAATAATAAACCCGACTTACTTATGTA  
 ATTACCCATTAACTCATTTCGAAATCAGCTAAAATAACACGGTTCGACGTTTTTAAACA  
 CGACCTAATGCGATCAACTAGTACCCTCTTTATTGACTCAAGCTTGTAACCTGATT  
 GATTAATGACTAATTGTGTGTTTTAGTCCAGGCTCAATCGAAGTCTGGAATGCGA  
 TTTAAACCTTTTGTGACCGGTCCGAGTCCAGAATATTAATATTTCCCCTCCAATTC  
 AGTTAAATGAGCTTTCATTAGCAGTACGCTTGTCTTTTCACTTTGGCTTAATTATCACGGCT  
 CTTACGAGTGGAGCAATCGAAAGGTTAAAAGTGGAGCAGGAGTACAGGAGTGTGTG  
 GACGGAGCACCTGCCACTCGAGGTGAACCTTCTCGGTGCAACCCGACAATGTCGCCA  
 ATTAACCAAACGAAATGGAGATATATGGGCAAAGCAGAAGAGCCCGTTGATTCTGCA  
 CTGCGAAAAGAATAGACTTAATTTCTTAATTTTCAAGAACTTCATGAGCTACAAAACAC  
 AAACTTCAAGGAATCGCACCTGCATTTCAATATATACCTTATAAGGTAAGGGAAAAAT  
 ATACGTTTTTAATGAAACATAAACCTTAATGTTGCGCAAATGGTAACATAAATCCTGATT  
 GATACCCCAATTTTGTGCTGTTTATCGAGTTAAAGGAGCACATTAATCAAGGCGCGTTG  
 CGCGAAAACAGTAGCTATTGGGCATATGCAAATATGCCCCGATTACTTACTCTCCGC  
 CCTGGGTTCACTTCTCTTTATCAATTGAGTCAGCAATAATGACGATATATGTACATACA  
 TATATACAATAAACCACCGCAGATACGATTTCAAGGTTTCCAATGAAAGTGCCGC  
 TGCCCGTGCCTCCGACGATCGGAATCATTTTTTATCACAAACATTGCCATTGCGAC  
 TGGCTAATGACAGCGCAAGTCAAGTCAAGTCAAGTTCCTGGCGACTGACTGGTCATC  
 ATCATGACCACCGTTGACTGTGACACGCTTCTGGTCAATGTGAGTGGGTGGATAATGGG  
 CAATGGACACGGGTTAATGGATAATGGTAACAGATATAGCGCGCTGATGCCCTCTG  
 GATCAGAGTCTCCAATCCACGAATGCTGCACTTTTTATGCCCACTTATTGCGTTAT  
 CGCAGTCTGTTGGGATTTCTGGGAAATGTTTACGCTTTTCCGACGAAACAAATGCCGAAA  
 TATTTACATAAAAATAGAGCATTTCATGGGCTTGGAAATCTGAAACTGGAATC  
 ACACGGACATGGGATGGGATGTGTGACCAGTGTGGCTTGGAGCAAATCGGTGCACCCAAA  
 TTAGATATGCTTCCAGATCGGCTTGAAGTTCAAGGCAAGTGTCCAGATTCGATACCGA  
 GTGCTAAAAGGGTTTACGCCAGCTGAAAAGCAGCAGCAGCTGTTTGCAGGCCATAAT  
 TGAAGCATTTCGTAGGTAATGGTGGCGATTTTTTTATGGCCAACGCATAAAATTAACACC  
 ACCGAGCAGAGTCTCGGAAATCCAACCTCCGAATCTCGGCAGATTTGTGTAATTGCGC  
 TCCACTTGCAGCGGGTACAGCCCATCCCGTCCGATTTAATGTGAGTCCATCACCCATGG  
 TTGGTGGTTATAGGGCTCGAACTCAATCTGCGGGTAGAAAACGTGCAATTTGGGTCAAG  
 AGAGGTGCTTCTCCTCTTTTTTTCATCTGTTGTTCCATCGTTATTTTATATGTTAATT  
 TTGGCCCGGCTCAAACTCCACTTTTTTATTTTGACCATCATCTGTTTCTCGCCGGCC

A

>h\_basal construct

CCGCAGATACACAGTACACAGCACAAAAACCGAACCTGTCGCACTGGGGTGGCGTCATA  
 TAGCCAGCTATTTTACCTTCTATGGGACGTCGTCGCTTGGCCGATGAATCAGCAAAC  
 CACGAACCGCGAGCCACCAGAAACCACCGCAGAGCAGCAACAACACCACCCACCGCG  
 ACCATCACCAACAGCACAGCCAGAAACACAGCCTCTTGTGAATCCCTCAGTTAGCAGAGC  
 CCAGCAGAGTCAAGCCAAACCGATCGCTGATCGACCGACCGACGATCACCAATGGG  
 GGTTCGCAAGTGTGATTTCAAAAAGGAAGAAATGCCATTCCCGGAGCCACGGGGGCG  
 TATGAGTAACCGGTGTGTACTTTAGGTACCGCTCACAAAGCTGAGCAGCACACACACA  
 CACACACTGAAGCGAGCAGGTAGCCGATAATGTATACCCCTAGGTAGCCGAATGCCA  
 GTGCAATTTGATTTGGTGGGTCGTTGCTCGGCTCGGCTCGCAGCGGCGATTTAGC  
 CTACGAACCTGTCGATCAATCGTCAGTCTTCCGCCGAGAGCCAGCGATAAGGTAGTCCC  
 GCTACGCTCCGCAACATCCAGACGAGTAAAGCAAATACTTATATATATATATACATACA  
 TATATATAGCGCAACCATCCGAAAGCCGAACGATCGATCTTCTGCTTCTGTCGCGAGTCTG  
 TTCGGTCTTTAATCGCACTGCAGCCAGAACCTGCTGCTCATTCGCTGCGCTGATTTCTG  
 AGCGTGGGTTCTATCGCTCCGCTTTGATAAACCGAATCGAAATCTAGAGAACCCCCCA  
 GACACAATACCATTTTACGCTGCTTCTCTGCGACGCTGCGGAAAGTGAACCCAAAGT  
 AACTTGAAAAAAGAAACTGACAACTTGAAGTATTCTAAAAAAGCAAAAAAGCAGTG  
 AACTTATATGCAAGAGCAGCAAATTCAGATTGCTGCAAGTGAACCAAACTGTGC  
 CTCAACTCAACAAACAATATCTGACCGAAATGGTTACCGGCGTAACAGCAGCAACATG  
 ACCAAGTCTTGGCGCCCGCTTGTGCGCCGACGCTCAAGGAGACGCGCTCAAAAGT  
 GACCGTCCGGTAAAGTTTCTTTCGAGAAAAATAAGACTCGAAAAAATAAATCCAAAGCCAA  
 AAACAAAAACCCGCTCAATGGATTAATCAGAACCTTAGTTCCCGAAATCTGTGGAT  
 TAACGTAAGCGAACCAACCGAGAATCCCTAATTGAGAGCCACCCACTTCGAGCTCAA

GTTGATTTCCATTTCGCGACTGTGGGCGACTGGCCCCATCAATCCCGCTGCCCAAATGCAT  
 TTCCTTTTTAGCCATCTCCACATGGCTGGCTGGGAATAAAAAACGAAAAAGAAAAAC  
 ACTCTGAGCCAGACAAAAAAGGCCCACTGCCGTCGGCGCGCAACACAAAAGCGAAT  
 TTATCTCGCGTCCGCTGGTGGCATTACTATATGGCATATGGCATACTACTCCGACTAC  
 ACACACGCTCCATCCATTCATGAGTGCCGCCAAAATGGCTGGCGTAGCTGCCACCAG  
 CTCCCAGATTCCGACTCGGATTCGATTTGGCTGCCACTTGGCGCGTGGCTCGCGTGGT  
 GGCTGCAATTTGCGGTCACTCAGCCGCCGTTTTTGGCCATTCGAACGGCACCGGTTCAATG  
 AGTTGGCCAGAAAAAACTGACTTCATGCGAGTCCAAATTTGGCAACTTGTGTCTCC  
 CTAGATAATAATGTACCTAGTTATGGCATCTTCGAATTTCCCGCTCTGACCTTGTACAT  
 TCTCTTTATTTTTGCTCATACCTGGTTGGTTTTATTTATAGCCACTGCCTGTAATTTATAA  
 CCGCAAATATTTTTAAATAAATGCCTCGGCCGAGTGGCGCTATAAATAGAGCACGGC  
 CGTGGACTAAATTTGGCCGCCAGCCAGTCAATCCGCTCCCCAACCTACGCCGCTCCTC  
 CTTGATCTCCTCAATCAATTTGAAGACCCATGCAGCTTCTCTATTTTTGGGTCTGTGC  
 ATGAGGTCAAATTAGCCGTGCAAAAGCCGTGACTAATCGATGTTTTTTTTTCCATTTCT  
 TGCCTTTGCAGTCGAAC

>eve\_stripe1 Fujioka\_Development\_1999

GGCTAATCACTTCCCTGAAATGCATAATTGTGCCGCGGCTTTTGATACGCTCCTGGCGG  
 AGAGGGAGATGAGGAAAGGATGCACGGGAACCGCAGCAAGTGGCAGTCGAGATTGGCAA  
 ATCCGCCAGCGACAATGCCAGAGAATGGGCAACAAGTAGCGCGCAATTAGCAATCCTA  
 TCATGCTTTTATGGCCGCCAACTCTTGGCCGCGCATCTCAGTTCATCCGAAGCGGGACC  
 AGGTCCAGGTTCAAGTCCAGGTCAGTACCCCTGCTATCCCGTCAACCCCTTTAGGGCGA  
 TAATCCTTCTAAATGTTTCATTAATTTGAGGCGTGGACGGATTAGGGCGTGTGGCTG  
 GCGGAACCCCGCAGCAGAAACCCCGAGGACACTGCACCGACTGACCTGCAGCTACAGA  
 TCTCTGATCTTCGATCTCTAATCCTTTTCGATTTGCAACTGACTTCTGCACTGGGTCCGC  
 CCCTAATCCTTCCGCCGAGAAGGCGGCAGAGTCGCGAGTACTGGCCGGGGTAATGGGA  
 TTATCTGCGATTACCCAGATGATCCGCAGAAAGTCAATCTGGTTTCAGGGGTAATGTC  
 AGCGAAGTCAACTAAATCAATCCTTTCCGCCCCCTTCTGTTTATTTGTTTGTTCGT  
 TTGTTTTGAGAAATTTCTGGCAATTAAGTTGCCCGTTTTGATGCGCGGGGGCGGTGCATC  
 AAATCCTTTCCGCATACCTGTCTGCACAAATGCTGAATTCGCATCCCATGGATACCCA  
 GATATTCAGATATCCCAAGGC

>eve\_stripe2 Stanojevic\_Science\_1991

AATATAACCCAAATAATTTGAAGTAACTGGCAGGAGCGAGGTATCCTTCTCGGTTACCCGG  
 TACTGCATAACAATGGAACCCGAACCGTAACTGGGACAGATCGAAAAGCTGGCTGGTTT  
 CTCGCTGTGTGTGCCGTGTTAATCCGTTTGGCATCAGCGAGATTATTAGTCAATTGCAGT  
 TGCAAGCTTTCGCTTTCGTCCTCGTTTCACTTTCGAGTTAGACTTTATTCGAGCATCTTG  
 AACAAATCGTCGAGTTGGTAACACGCTGTGCCATACTTTCAATTTAGACGGAATCGAGGG  
 ACCCTGGACTATAATCGCACAAACGAGACCGGGTTGCGAAGTACAGGGCATTCGCCGATCT  
 AGCCATCGCCATCTTCTGCGGGCGTTTTGTTGTTTGTGTTGCTGGGATTAGCCAAGGGCTT  
 GACTTGGAAATCCAATCCCGATCCCTAGCCGATCCCAATCCCAATCCCAATCCCTTGTCC  
 TTTTCATTAGAAAATCATAAAAACACATAATAATGATGTCGAAGGGATTAGGGGCGCGCA  
 GGTCAGGCAACGCAATTAACGGACTAGCGAACTGGGTTATTTTTTTCGCCGACTTAGC  
 CCTGATCCCGAGCTTAACCCGTTTTGAGCCGGCAGCAGGTAGTTGTGGGTGGACCCCA  
 CGA

>eve\_stripe3\_7 Small\_Dev\_Biol\_1996

GGATCCTCGAAATCGAGAGCGACTCGCTGCATTAGAAAAGTATAGATCAGTTTTTTGTTTT  
 GGCCGACCGATTTTTGTGCCGGTGTCTCTTTACGGTTTATGGCCGCGTCCCATTTCC  
 CAGCTTCTTTGTTCCGGGCTCAGAAATCTGTATGGAATTATGGTATATGCAGATTTTTAT  
 GGGTCCCGGCGATCCGGTTCGCGGAACGGGAGTGTCTGCGCGAGAGGTCCCGCCGGC  
 GATCCTTGTCCCGTATTAGGAAAGTAGATCAGTTTTTTGTTCCCATTTGTGCGCTTTT  
 TTCGCTGCGCTAGTTTTTTCCCGAACCCAGCGAAGTCTCTAATTTTTTAATTTCTCA  
 CGGCTTTTCAATTTGGCTCCTGGAAAACGCGGACAAGGTTATAACGCTCTACTTACCTGC  
 AATTGTGGCCATAACTCGCACTGCTCTGTTTTTAAGATCCGTTTGTGTTGTGTTG  
 TCCGCGATGGCATTACGTTTTTACGAGCTC

>eve\_stripe4\_6 Fujioka\_Development\_1999

GGATCCCTGGGCTCTGGGCTCTGGACTATCCGCCGACCTCCATATCCATGATTTACAAT  
 TCTCGTTTTTTTCGCTTATTTTTTAGGGGCTTAAATGACCGTCGTAAGCCGCGAGGAG  
 GACCAGGACCAGGACTCTGCTCACATTTCCGCGCACTGATCTAAAAAATGAAATCATTTT  
 TTCTTGAATTTACGGCGCGCCTCGAGCAGGACTCTTTGTTCTCGGCCAGGCAATTGTCC  
 TTTTTTGCCTCAGCTCTCAGTTTTTTTCGTCAGCGGCATTACCTACAGCGGTTTTAT  
 GCGGAGATGATATTCGCTGGGATCGGTTCCGTTTTTTAGGCCATAAAAAATAGGCGGC  
 ATAAAAAACTGCATTGGAATTTAGTTCTAGTTTCAAGTTTTTAGGTTTCCAGGTTTTCT  
 GCCAGCCCGCTAGATTGCAATTTCCGGAATTCGGAAGCGGAACAGAATGCCAGAATGG  
 TCAGAATCTGGCTGACCTTGCCTTTTTGGCCAGGGCGGTAAAAAAATGACTCGCTCGG  
 GTGCGCGGAATATTTTTAAATCTGACTTTCCAACAATCTCTGATCTGGGTTGGAATCGT  
 AA

>eve\_stripe5 Fujioka\_Development\_1999

GGGCGGGTGCATCAAATCCTTTCCGCATACCTGTCTGCACAAATGCTGAATTCGGCATC  
 CCATGGATACCCAGATATTCAGATATCCCAAGCCGCAAGTCAACAAGTCGGCAGCAAA  
 TTTCCCTTTGTCCGGCGATGTGTTTTTTTTTTAGCCATAACTCGCTGCATTGTTGGGCC  
 AAGTTTTCTTCCGCAAAATTCGGGAGATGATGCGGGATTATGCGCTGATTGCGTGCAA  
 TTATGGACATCTCGGAGGCCCCGAGGAACTTCTGCTAAATCCTTTTCATCCGCTACAG  
 AACCCCTTTGTGTCCTGTTCCGCCGGGAGTCTTTGACGGGTCCTTCGACTATTCGCTTACA  
 GCAGCTTGCATAAAATTTTATAACCCCTACGAGCGGCTTCCCGGGAATCCCTGGCATA

TCCTTTTTACCTCTTGCCAATCCGTTGGCTAAAAACGGCTTCGACTTCCGCGTAACTGC  
 TGGAACAACAAAGACAAAAACGGCGAAAGGACGGCGATTCCAGGTAGCATTGCGAATTC  
 CGTCAAACATAAAGACCGGTTATATAACGGGTTATATGGCCAGAATCTCTGCATCTCCA  
 CGACCGCCAGAAGCTGCGTAAAACTGCAGGCTCTGTTTTGATTTCTGCAACTTCAGTTAA  
 TTGCCCGGGATGGCCAGCAATTGCCGGCAATTATAAACAGCGCAGATGTGACTCAGCTT  
 CCATATCTAACTCTATATCTCATGCCGAAAATCTAGGGTGGGGAGCGGAGGGCGGGGTG  
 CGTGGGTGACTTGCCCTGCCA  
 >eve\_late Fujioka\_Development\_1996  
 CTGCTCGCAGCAAGGTCTGCTGAGTAAAAAATTAGCACATCCTCAGCGCAGATAAACGCA  
 TCCTTAAAAACCCCTGGCCATCCCACAAGCTAGCCATCCATCCATCCGTTCCATCCTGC  
 ATCCGCATCCCTTCGCACAGAGAGCGGCCAATTAGTGCTGCAGTAGGCATTTGCAATCC  
 GTACCCACAATCGGCTAATCCGCTGCCACTGCCTGCCGGCCAGAGTCCAAAAAGTCTCG  
 TGTGCAATGTCCAGTTCCGAGTCCGAGAGTCTAAATGTTGACAAAATACAACACCTACG  
 ATACAAAATAAAATTTGCTACAGAAGTACCACCTAAAAACGGGCACAACCGGAACGACTTAA  
 TTTTCTCAAATTTACAGAAAACAGACGATGACATAGGAATGGGAATGGTATGGTGATGGA  
 AACACAGGAAGATATCTCGACCGGCCACTGAAGCTGTGGGTTGCTCCTGCCGAGCGAA  
 TCCAACCGGAGTAGGGTCCCATTCCGGGGCCGAGTAGCCAGAGTCTGCAGCTCACTCGA  
 AACCGCCACTCACCGTGGCTAATTTGCCCATCAATAAAGGGCCCGGGCAGTGAGGAATTC  
 TCCGAAAGTCGGGTCTCCGTTCTCCAGCCGAAGATTTTTTCGAGCAACAAAAATTTAT  
 GGTGTGCCCGCTGTTCTCGCACAGTCCAGCGAATTTGCTGCGGTGAGTTCGATGCTGTT  
 TCGCAGGACCTTCTCCATTTTCGTTCTCCCTCTGCTCAGCCTGTCCCTGTTCTCTGCA  
 GTTCCCTATCTCTGATGCCTGTGCTCCTTTGGCGGCACTGTGCTCTGTCTGCTGTTGTTT  
 TCCTGTGATTTGACATGCTGTTAGCAGGATGCTGACCTGAGGCCGAGCCCTGGTCTC  
 AGTGTCCACTGTTCCACTTTGATGTGATTGCTCAGTGCAGTGGGACTACTGCTACTGCTCT  
 CTTGCTGGACTGCTCTTGTAGTCTGTTCCGGCTGCCCTCCCGTGACCTCTGACCCCTGC  
 ACTCTGCGGCTTTCCAGCGGCTTTGTTGGCGAATCTGACCCCGAGCTCCTGTCTGCTCCT  
 TCGCTCCTTCGCTCCTCTCCGCATCTCCGCTCTTTGGACTTCGTACGAATCAAAATTTGG  
 TCACAGCCCGAGTGAATTTGCCCGGAGACCGCAATGCGCTGATTTATAGTAAACGCTGT  
 CCGATTGATTTGGCCACCCGTTGGCGGCTCTGTACAGATGCCTCAATTTGCATCTATCGA  
 ATGTTTTACATGGCTCTAAAAAGGTACC  
 >run\_stripel Klingler\_Dev\_Biol\_1996  
 GATCTCCAGTTTCGGCAGTTCGCGCTCGCCTTTTTCCCGATTTCCGCATCTCTCCATCTC  
 TCCATTTAGGCATTTTCAGCATTTCCACATTTTCAGCATTTCCACATTTGATGATTTTCCCG  
 CATCGCCCTACCTGCGTCTAATTTTCGTTTTAATCCTTTCACTAGCTGTACGCCACTAATC  
 CGGCCGAATTTTACGGGTGCCGCGGGCAGGAGCAATGGCATTATCTATAAAGATGACA  
 ATTTGCAACAACAATGACGACAATCGCGGCAAGGACAAAACAGTAGTGCATACCTCTTTTC  
 GCGCCCGGTTCCCGGCTTTTCCCTTTTCCCGCCACGGTTTCFACCTCTTTTGGCCACT  
 ATTCATAATTAGTTGCAGGCAATTAAGGCAGCCCCGCGGTACAGAGCAAGGACACTCTC  
 GTCCTCGCCACCCGAAAATCGAAACCGAAATCTATCTTCAAAGTCCACATCCCGCGT  
 CCCTTGTAGGAGGACAACCTAGGTCAATGCGTCAAAATCCTGGGCGTTGCCCTTGCACCT  
 TTGCGATTTTGTTTACAGATTTTGAAGAACACAGCCGACCCCTTTCCGCCAGTGATC  
 CCGGATTCAGGATGAGGATTCGCACTCCTAATCCTTTGACTTTTCAGTTTACTTTTCG  
 CTCCAAGGATCGCCGCTAGTCCGGCTTTCCGAAAGTGTGGCTTACTTTGGTTCCGCTC  
 GGCTCTACGCATCCAAAAACTCGGCAATTAACGCGGCTGATTCCGCCGAAGTCCAGAAAT  
 CCTAAATCCCGATCTCTTCTATGGGTGGGTACCGCGCAAAAGGGTTTAGTTTTAATTAGT  
 CGACTTTGGACGCGCCTCATCGAAATGGTCCCGAAGATTGGGAGGACGTGAGTCCAGGG  
 GGGCGGGCGATTTGGGAAGTTTCAAACATTCAAATCGAACGAAAAATCAGTGCCTATA  
 ATTTAGAAAAATTAATAGAACTGGTAATAAAGAATTAATAATGTTTATAATATTTATA  
 TGTATATTTATGAGGTGTGCGAGCTGGAATAATATAAGATTAAAGTGTTCGATATAACAA  
 GAAGATAACACAATGGCTAAACACTGAGAAAGTAAATGCAGATAGAAACCATACGAAT  
 CTCTTTAGTTATAATGATCTCCTCCGTTAGTTTAAATCAAAATTCACAAATTTCCGCCAATA  
 AAGCCATAAAGAACTTGGGAGAAATTTCCAAAAACTGCCCGCTGTCTTTAATTTGGT  
 GATTAAGTTTTATTAATGTTGCAACTGGCGAAGAGCGGCAAAATGCCGCGTAATCCCCCT  
 CGCCAAAAACAAAACCCAGGACGACACACAGAAAAAAGAAAGAACCGAAGCGAAACCT  
 CCGGACCGAGTGTCAAATTAATTAATAATGTCAGCGAAATATGTTCAATTTGCTCGGCTGGT  
 AGATGGATGGGATCGAAATCGGATTCGGGATTGGGAATCGGGCTTAACCTCGGCTGGCTG  
 TCAAACAGTTTTTCCGCTAGCTGGGCATAGCCGGAAGGAAGAAAGTCCGAAAAATTTGTG  
 AAAGGACGGCGAGAGAGCGCCCTAAGCAGCGGTTTTTCCAAAAACGGGGATCCT  
 >run\_stripe3 Klingler\_Dev\_Biol\_1996  
 GCAATCGCAATCACCTTTTGTGCGCTTGAGTGTTCGCAAAACCCACCCGCCAGAAAT  
 TTCATCCCCATTTTCCGCCCACTTTCCATCCACCTTTTCCCGCGCTCCTTGTGAATGCAA  
 AATGGAATGACAGCCGCAAGGACGTTGCTGACAAACCCGAAACCGGAAAAATGTCAGCAA  
 ACAGGGCCAAGAAAGTTGCAAGCGGAAATGGCGGGGACAGCGGGAAACGTAAGGGG  
 GAATGGCAGTTGACACTTGCAGCCCCGAAAGGATTACTTTGCAACGGGAGCGCGAAT  
 AAATAAACACAACCGAACACGAAACGTTTGCATACGGAACCTGACTTTGGGGTAGCC  
 CAATGTAATCATGCTAAGCATACAAACAGAGCCTGGGGAAACTTGCATGCTCTGTAAGGAC  
 CCAGGCTTACCCTGTTTCAAGAACTTTTGGCAATACGATCCTAAGTATGTTATGTTTCCAG  
 ACTTATGATAAAACTAGGTGCTGGAAGGATTAATAACAGAACACATTGAATTAAGTGTG  
 ACATATGAACAAGAAAACCTCACACTTAACACTTTTAAAGATAATCAATAGGCATTTGCTCT  
 AGCCCATGTTATAACAATTATCTTACAATTGCATAATGAAATGCATGGTATTTTATTT  
 GTCCATTGTCTCCGATTTTTTGTCTATATACCAACATACCCTACTATACCTTAGAAAAC  
 ACCACAGAAATGGCAGCCCCCGTCACTGTGACTGTGCGAAGTGCCTTATGCAATCGGTG  
 TCCATATATATGACACCTCCGTAACCCAAACCCAAACAAAGTTTCAGAACCCCGACTCC

AGATCCCGGATCCAGAAACCAATCCCAACTGGAATGCCAAACAAATTACATGAACATGA  
 GAATTTTTAGCGATTATGCGCTTTATCGGGGAGCACTTCGATTTCGGTTGGGGTTTTATT  
 TTCAACAGTCTGTGGGGAGCTGTTTTGGTTTTGGCCTGGAGGAAGGGTCAATGCGAATGC  
 AAAATGGCTATAAAACTTTACCTTTATGCGCCGATTTGCTTGATTCAATAACAATTTGT  
 TTAGACTAATCTTGAGGGTATTTTCGCAGGGATTTCTGATTTTTTGCATTCGTTTTTGG  
 GACAAAGATGGTAGTTTCCGTAGATTGAAATTTCTATCTATAGAAATATACTGATTA  
 AATGCTGGCAAATTTGTAATCTCGATTAATGCTGTGTAAGTGGCAAAAAAAAAACGTT  
 GGGAGCGGCACTTTTCGCAACTTTTGATGAAGTATTTGTGAATTTGCACATTTGCCCCAC  
 TTGACTACTGTCATAAAATCCCTTTGTGCAAACTTTTCACGCCCTCTGGAGGAAGGACGGG  
 TTTTCCATTTCCGCTTTCTTGTGCTTTGTTTACTTTTTTATAGCCCAAGTGTGGCAT  
 TTTTGATTGTTTGCCTCCGAGATTTCTTCTTTTTGACAAATAAAATGTCAAATTTATAAC  
 ACAACAAGAGTTACCCACATCCTTCGTCGCTTCTCTTCTGTTTTCTGTTGTTCTGTTGT  
 TGCTGTGTTTCTAGCTTCTTAACGAGCAGCTCACTGTTTTTGGGGTTAGACTGCGAA  
 ACTCCACCTCATTTTTTTTATGGTGTACGAAAAAATCGCGACATGTTGGCAATAAACAG  
 CAGGTGCCGCTGGCAGGGATCTGAACAAAAATAAAAAACAAATGCAAAATAAAAAAA  
 AAACACAAGGTATGGCAATTTGCTGTGTCTGCTCCAGTTTCTGACCAGTTTTTAGTGT  
 TCTATTTTTTGGTTCGAGCAGCATAAGTCTTTATATGTTTTTTTTCTATTTTTGGAAA  
 TTTTTATGAGGTCACTCGAGGGGCGAGAGCCGTCAGGGATCAATCCATCATAAAGAGGC  
 ACTATGCACCACCCGCTCAATTAGTTCGAATCTTCGGCTCCCTCAATCTTTTTAGGGC  
 GAAAAAATTCGGAATCCTCGACGACAGGATTTTTATTGCTCGAAAAACATGCAAAAA  
 GTAGGACATCGACGACAGGACGCCCCAGGGTCTTTATGGTGTCTCTCGTTTTACGCT  
 TCTTAGGTAATTTTTGGGCCAATTTTATGGGCCATGAATGAAGCAGCGCAAAAAAGAGAA  
 GAAGGCCACGGCCAGCACAAAAAATTCCTTCTAAGAGGCCGAGAAAAAATGCAAAAT  
 TATTACGCAAGTCTGCGGCTTGGGAATTTCCGCAATTTGTAGGTCAGCTCAGCAGATT  
 TATGAGGTCTCGCTGAGGACCTGATCTAGATCTA  
 >run\_stripe5 Klingler\_Dev\_Biol\_1996  
 TCTGTGTCATATTTCAATTTTGAATCTGCCTGTCACTCATTGTCCGACTTTGTCCGA  
 TTTTCCGGGTGCTGGTGTGCTGGTGTGGCAATCTCATGCTCATTGCCATTTCCCCC  
 TCCCGATTTCCGATTTTCCGAGTTCCCGTTTAAACGTTTAAACGTTTCCCATTTCCCATTT  
 CCCATTTCCGATTTGCCCAACCCCATCAAAACGGGACTGTGTGTTTTTGTGTGTCCGTT  
 AATGTGCATTTGACATTTGGCGAAATGAGAATCTGGGCAATGATACGGATTTATGGCAA  
 ATTTGTGAGCGATTTGTGTGATTTACATGAGTGCCAAAGCCCAAGTGGCCACTCAAGGC  
 TGCCACATGGGATGTGAGCGGATTTGGTACCGAAACGCTGCCCAACTCGAGCTGTTATGT  
 TAATGATACCCCGCAGCTCGACAAGAGGAGGTCCTTTTTCTGACTCTGACGGACAGTTG  
 ACAGCGGACAGATGGGTTGGCTCCGTCGAAAGCGGATTCATGACCACCTTTTTGGACA  
 GACTTGTGGATGGGATTTGGGAATTATACCAATTTCAAGTAGCGGCAGTTGAGTTGC  
 GTAATTTCAAGCAGTATAAAATTTATAATCTAGTTGGATCAGAGGAAACTGCTAGACGGCT  
 AGTTGATAGTATATAAATTTCCATTTGTATTTCTCCATTTTGCCTATTTAACTAAATAACCC  
 AACTTTACTGACCTTCAAGAATTTATTTGCACTTTTATTACTCTTTGACAAAACGCCAA  
 GATACAAGGAACCTGATCTCTTTCATTGAAGAGAAGCAGCTAACATTCATGAACACAA  
 AATTTCCGCGGAATATTCGAGTTAATTTGAGATTTCCCTACAGTTTCCCTACAGTTTC  
 TTTGACACTTTCCATTTTTCGCGAGAGCGCGCAAGTCAAGGACACTTTCCCGCTAACCT  
 TGCCAATCCCTTCTTCTTTGCAATCCTTCCATTTATTTCCCTTCTGTTTTCCGGCTA  
 ACTCCACTGCTGTATATAACGTTGCGTTTTGTTAAACAAACCATAAAAAATTGCAAAA  
 AAAAAAAGTGAAGAGTGGGAGGGGGTGTTCATGCCCGAGCAAAATCCTTTTTTTTTGTC  
 CCTTGTCTTTTTGCGCGCCTGTTGTTGTTGGTGTGTTGTTTCGGTTTTGGCGAAAA  
 TGTTCAACTGTGCGCGGATTTGCGAGTTGAGTTCTGAAGTCAACAACAATGGTAGGTATGT  
 ATGCAGGTGTGTTTTGGTTATAGAGTGGTGGTGGGCACTGAGAATAAATACGACCA  
 CATCCAATGAATTC  
 >run\_7stripes Klingler\_Dev\_Biol\_1996  
 GATCTGGGATTCGGCAAGATGGAGTAGCGCACACGGGCAAGAACAGCTGGCAGTCCG  
 GAAAAGTGTGTGAAAAAGGTTGAAAGCCAGCCAATGATGGCCACTAACCCAAAAACACA  
 ATTTTGTGGGAGTGTGCAAGGCAAGAATAAAAAAAAAAAGAAAACCAAAAAAAAAAAAA  
 AAAAAGGAAAAGTTAAAAAGAAAAACAGAAGGAAACCCGAAACACACTCATTCCCCGTTT  
 TTCACCACAGAAAGAAAATAAAAAACCCCCAGAACCGAGAAAAAATCACTCAAAAC  
 AAGCGTTTTCCAATGGAAGTGGTGAACCGGCTGTGGTGAATTTTTTCCGAGGGTTGAA  
 TGACGTGCGCAGCGGGGAGGGGATGGGAGGAGCGGTCGGAAGCCGCTGCCGACGTCG  
 CTGCCGACGTCGCTGCCGCGAGCACTGCCAGCGCCACAACAAAACAACCAACCAATT  
 CACTTACACAACCGCCGAGCCGAGTCCGAGTCCGCTGCCGCGCGCTGCCCGCTT  
 TTCCGCTTTTCCACTGCTGCCTTTTGTAAATAAAGAAGAATGCGCAAATTTGGCGGCACAA  
 ATTGTTAAATACACTTTTCAGTATATTTTCAAATATATTCATAACGAAATAAATAAGTTT  
 TTTTCCCTAAAAAATAAAAAACAAACATTTATGCACGTTTTATAATACTTTACAAATATT  
 TGTGAAATAAATTGATTTATTTATATAACGCTTTTGTAGCTATTAAGATATTT  
 AATTTTTTACTACAAAATATGTTTCATGCTTAAATTAATAAATTTAAATTTGAATTTCA  
 TTCACTTTATACAGATGCTTAGTTAAACAGTTTTTCGTCGTTATAATCGTTTTCAAAAA  
 GCATCAATATGTTTATTGTTCACTTGTCAATTTGAAATAGTTAAACTAACCAAAACACCGAA  
 GGGTACAAAAATGTTCTCGATTTGGCAGTCGCTTTTGTTTTTTATTTCTCTGTGGCAGTG  
 AGCATTTCCCTGCGCCACTGGAATTTCCACGTTGCCAGAGTTTCCGCTCTCTGTCCGT  
 AATTTTTGTTGGGGTTCTGGGGTTCTCCGTGGTCAATGGCTCCTGGCTCCTGGGATCCC  
 TGTGCATTCAGTATAGCTGGATAACGGTTGTGCGAGGAGCTCCATGAGGAGAGCGGAG  
 CCAGATCGGCGACCGCTCTGTTCTCTCCATAACGATCGCCCTACTAATAAATCATC  
 CCTCTGGATGTCAGCTATTTCCGTAGCATCTGCTCGCAACGGTTGGCCGATCTCTGC  
 GGTACCCAGCCCTCGAGCGTAGGTGCCTCTCTTTCGTTCCGCTGGTGCCTGCTCTTT

CTGCGAGGGGGAGGGATCTTGCACGATATGAATAATTCAACTGATCGCCGTGGTGAT  
 TGGGGATGAACGAGTACTGGTTTGTCCGTTCTCGGAGGTGCGGAATGCACAGATCGT  
 AGTTCTGATACCCATTCATTTGAGGAAATTTATTCAGGAACGTCACGGTATTTGCATAA  
 GTGAAATCGTATCTCACAGTTAGCAGCCTGTATCGTAGATTGATTACTAAAACTTTTC  
 TAAATAATCTGCACTAAGATATAGTTTACAGATTGCGTAAGATCGGTAAGTACAGAAGCTTT  
 TAATCGCACTGGAAGTTTTATTTACCGCTCACGACATTTGCATAGATGAAACCGTATCTT  
 ACAGATTCAAGTAGCTTGCCTACTAACTACTGTACAAAAATATCTGCACTAAGAAATA  
 GTCGGGAGTGATTTTTATGGTGAAGTACAGAAGTAAATTCAGCTAATTAAGCCTCGCTC  
 TTTTTGTTTAAATTAAGTCTCAACAGCAGTGAGAAAAACATTCATATATATGAGTAC  
 ATGAATACAGGTTACTGTCCCTTAATCTCCCATCGGTTAATCCCGCTAAAAAGCGAAGT  
 CCTTTGAGTTTTGGTGGCCAGGTAGGCACTTTCCGATCAGATGCTCGTTGCTTATTTT  
 TTGGGAACATATTTTATGGCCCGTGGCGGGCGTAATCGGCCAAAATATTTGCGGGGCGT  
 CTGCTTAATCGGGGCGATTGACTTTTCATAAGCAAAGGATTAAGATTGCGCGGTTGGACT  
 ACCTGTTTTGAGTGGCATATCAGTACATGCGATGGTACATCTGAGGGCCAGGTACGTCA  
 AAGCCAGTAAACCCATAGTTTTCCCACTTTTTTGGGGCCGAAAAAGCATCGGAGGGCC  
 CATAAAAAAGGGTTGATCCTTTTGGCTGCTGTGGGCTCGTAGCGAGTTCGGTATGGAGA  
 TCAGGTACTGCCTGGTGTCTCGGTATCCCTATGAGGCGGTCTGCGGGTCTGCGATGCG  
 CGTCTGCGGCAGCTCCTGTGCAAAATGCAAGGAAATCGCAGCAGGATCCAAGAAGCGA  
 CGACAGGAGCGTGATTTCCCGGAAACCGGCAATCGTCAATCGGCCATCGGCAATCGCG  
 TCCTTGTGCGACGCCCGCTAAACCTGCGCTGTCTGCCATATATCCCGGGGCTATATGGT  
 GTGAAATCGGTGTAGGGACACGAGGTCTTCCGAGCGAGCGGCGCGCAGCTACAAAAGG  
 CAGCGCTGCCGATACACTGGATTTACTGGAAGTGTGCGTCTATAATGTCCAGCTGAGAGC  
 GCGCGGTTCTCGGACATTTTGGTGGTCTGCTCGTAGTTCCCTACCAGAATGGCCA  
 TGCTCCCACTTCTCTCTCTCTCCACGCGGTGCTGGAAGAGTCCGCCACCTCGGA  
 AAATCGCGGGTCTGTGTGGCCTCGTTTTTAAGGTTGTTTTGGTGGGCGCAATTTTTT  
 GGCCAGTCAGGCACTTGATTTGCGTTCCTGACCGAAATGAGTGTGAAGGAATTGAGA  
 ATATTACTTTAAATGTCAAGTCAAGTGTCAAGTGTATTTCAGCAGCTCTTAAGAATTAA  
 TACACAGTTAATCCATTTTACATTAAGTAAATTAATCGTTTCATATTTGTTTTGAAGC  
 TAAGTTTCGTAATCTGAATTAATCTATGTATGTGCTAATCACTTAGCCAATCGCTAAG  
 CAAAATGTACAAATCTTAAACCTAAGTAAACCTAGATTAGTTTGAAGAGAGTCAATGT  
 AGGCAGCCAAAGATACTCGATGTTCTTCCAAGTATGACACTTCCGCATCAGATTAATCC  
 GATCAGCTAGCTAAACCTGATCCAATCAAGGATCGGCGATCGCAGGCAGGAAAATGGAA  
 ATGAAATCGAGCCGGATTGCGCCACACGAACTGAGAGGCGCACAATAATTTACAGGACTA  
 ATCGCAGGATAATCGCCGATCAGCATTAGGATTAAGTTCGATCCCGGAGAGATCGATG  
 GCACTGCATCTTAGATAGTACTGGAAGTGGACCGGACCTGACAAATGGGTGTTAGTTGGAC  
 AGATTAGATCGGAGATTGAGATCAGTTGATCGAGTTCCGAGTTCGAGATCGGCGATA  
 AAGTAAATTTTGGGCGGAATCGAGAAAAACATTGAGCAACACTGAGGGATCAGTGTGCGC  
 TAATATGATCAGCCGGGATTTCTGATTTTTGAATGAAACACTAATTTTTGGGACATT  
 TTCGAACAATGGGACGCACTGTTATGCACGTGTATATGTTTATTAATAGATCTGATCTT  
 AAATTACTTAACCTAATTTTAAATGAAATGAAATATATGGAATACGTTGATGCATATCA  
 AAAAAAAAAAATTAACACTGGAATGATTAGTTTTTTGAACAGATTAATTAACAGATTT  
 GTAGCACTAATAATGATGATTTTAAATATCGTGCTTATGTTGATATATATATATATAT  
 ATATATATATATATATATATATATATATATATATATATATATATATATATATATAT  
 TAAGATACCTTCGAAAGCAATTAATATATGATAATAAATACAAATATAAAGGAAAAAT  
 AATTCATCTTATGATAGTATGGGATAGTGTACTATATGACTATAGATTATATATCATA  
 ATTGAAATCCCATGTTCCAAAATTTCCAACTCCACAATCGTATCACCATGAAATTA  
 AAAGGCTTAAATCCTTTTATCCCAAAGTCATAGTATAGTCTCCTGATGCTTGTGAT  
 AATATTTATGATAAATTCGCAACCTGATCCCTCCTCGCACTGACTAATTGAGTCTCATG  
 TCCTGTGCGCAGGACGCCCTGCGATCCTAGCTACTCGGAAAGGGAAGGCAAGGGAACG  
 AGAAGGAGATGGTGAAGGGAACCCCCGTTTGGCCATGGGTGCTACCTGTACCACCCGC  
 CCCCGCCCCCTCGACGAACCCCTCCGAGGAGGGCCGCAAAACACGCGCGCCGCTGGA  
 AGTGGAAAATGGGAACTGTTGCACGGCGTTTTTCTTTTGGCGTGCCTGGGAAAAAAT  
 AAAATCAAAGCGAAGAAAAGGAAAACGCACACAATTTCCAGACCGCCGTTGGGAAAAG  
 CGAGAGAGGAAGCGAGAGCCAGAGCGAGAGTGGAAAAGTCTCGGTGATTTCTTTTTT  
 GAGTTTTCTTTGGTGCAATTTCCAGGCCATCACTCTCTCTCTCTCTCTCTCTCTCTCT  
 CCAATGCGATTTTCTTTTTTCCGCTGTTATTTTTCTTTTTTGGCCACAAGTAAACAAGCG  
 ACTTCTCTCTCAGTACACAGGCACACTAACACGACAGCCAAACACACACACACACAA  
 ACACACAGAGAGCCGAATGGAAAAATGGGAAATTTTTGCTGTGGTTGTTGTTGCGGC  
 GCAATGTTGGTGTCTCGATATACCGATATATACCTGCCCGCACCTTAAAGGCGCGC  
 CTGTGTGCTAGGTAGCAACACACCACCATACCGCCAGGATAATGGGCGGGAAGAG  
 ACGGCGCTAGCGCGTGAAGTGGGACGGGGCACAACGCGCGCAGAGCCCTCGACAGAG  
 GCGGCGAGCAGCGATTCCACTTTAAATACTGCCAACGATCGCAGCAGAGAA  
 >run\_-42\_construct  
 GACAAACACATGGCGCACAGCCTGAGAACCGAAATTAATGAAATATTAAACTCACACGA  
 TGAGTACACGACGAGAAATAAGATCGACTGAGCCGAGGTATTTAACGTAAGATACAAAA  
 ACCAGGACTTCAATCAAGAAATTAATAATGGGCAATGCTCCATACGTCGAAGTTGTAAT  
 CACTTACTTAAACACTGTTGCAATTTATTAGAATAGATTTTTAATATGGATTACTTTATA  
 TTCTACACCTCAGTTATTCGATTTCTTAAGTGGCATTCAAGAGACTCTCAACTTAAAAA  
 CTTAAAAATGATATTTGAAATTTCTTGGTGTACGGTGGATCTCCAAAGCGATGGACAGC  
 AGTTAGGATTAACGGAATGGGAGAATATTAATATTTATAATTTTCGATTTGTTCCCG  
 AGCGGAGCGAGTTGACTTATGCGACAGTTTTATTGAGCGTGGCATCTTGGAAAAGTCAA  
 ATCCCGCGCCGAGGGCCACAAGGGTTAATGTTAATTTGCTCTTTATGTTAAGCGGGA  
 AATGGCCTGATGCTCCGAAAAAAAACACTCTCGAAAGTCAAGACACATAATCCCCATG



```

TGTTTTTCGCTCGATTTTTACTAGTTCGCGTAGTTTGTGCGAAAATCAGACGGCAAGCG
GGCAAAAATTAGCCAGAAAAATCGATTGTTCATTTGGCATTGCTTAACCCATTTCGCTGA
CCGAGTCATAAAAAATCTCACAAAAAATGTGCACGCATTTTTTAACCCCTTGCCAT
TGCCCTGAAAATATAAAAAAGAAAACCGAACCCGTGCTGTTCTCGTTCCACATTTACTCC
TTTTATCTCTAATTTATGTCCCGCCCGGTTGTCTCTTTTTATGGTTTTATTACTATACGA
TCTTGCTAAAAAAGAAAAAAGCAGAGCGAAAAACAGCAGAACAGAAATCCGACAGAT
ACTTCCACTAGCCTAGCTACATAGTGTGTTAGTGGCTATAGATATTATGCCTATATGAC
ACTGATCCATGTGAAGATGAACGCTTTCACGCACGTCTATTTGCGCATACAAATTTGC
GGACTTAGTCGTGCGTATAAAGCACGAACGTATCTAAAAATAAATCAATTTGCCTATAAT
ACTCTACAATTTGGTTATAAATTAAGATTTAAGTTTGAGTCATTTGTGGAATGCAGTTC
ACCTGAAAAGTCATTTGGGGTGTGA
>run_-41 construct
AACGCTTTCACGCACGCTCTATTTGCGCATACAAATTTGCGGACTTAGTCGTGCGTATAA
AGCACGAACGTATCTAAAAATAAATCAATTTGCCTATAATACTCTACAATTGGTTATAAAA
TTATAAGATTTAAGTTTGAGTCATTTGTGGAATGCAGTTCACCTGAAAAGTCATTTGGGGT
GTAGTGTATACCGTCTTAAATTTGCATTTGCCATAGCAGCAGGAGTAATAAAAAAGACTCG
GGCCGACGACCAAAAGGACCTAAGGTCCTTTTGCCTGTACTTCTTACGCCCGTTTTTAA
CCCTTTTTTTGCTCTACAATAACAATTACAATTTGTTGCGCTCGCGAAAAGGGGTTAAGG
CGGGTAAATTTCAAATTTCACTGACCGTTTTTACCTAAACTACCGAGAATCGCGTTTTAC
AGTCGTTTTTTGTGCCCTTCTGCGATTTTTGGTTGTTTTTTAGGATGGGTTTACTTCTT
ACTTAGAATTTGACCCCATCTATTTAGGTTTATAGGTTTCTAGTGCAGTTTTTTTTCCAG
TTTTTTTGTTCCAAATTTTTTGTCTTTATGGTACACATTTTTTAGCATTTCGCGGAAAC
GAATCCTTTCTCTAAGTTGTTTTTAAATGTTTTGGAATTTTTCTTGGTCGGTTCTGGATG
ATTTTTAGCCGCTTCTTTTACTTTGCTTTGCTTTGTTGGGTTGACTTTTATGACTAGGTTTT
CGGTTGAGCCACAGTCAAGGTCCTAAGTGGCTCAAGTTCGACTGAAGCACCCCACTCA
TCTGTAAGGAGATGGTAATTTGAATGCATATTGGTATACTTATATTTAATGCCTATCTAT
TAATCAACAAGCTTTGCTAAAATCATATTTGCGACAGTTAGCAGAGTCTTCAATTTAGCCT
TCAATTTTACCAAGCAATTCATACCTGGAATAATTTGATTTATGAGAGTATATAAAAAAT
GAAAAACGTCAGAGCCTGGCAAGACTTTGCCATTTGTTTGTATTTTGTTTTTTTTTTTT
ATGTGCTCAGTGCCCTTTACTGATTTTCTGTGTGCAATTTACTTTCATCAGCCGCTCT
GTCTTGAANAATACAAAACAGTGTAAAGGAAAATTTGCTCAACTTAGCTGCGCATCATTTA
ACTTTGAGCAAAAACGAGCGGAGTGGATTACACACATGAAAGGGCATTCAAAAAGATACA
TCGAATCTGTATCTTTTTTCGGCCAGAAAACCGAAAACCTGAAAAGGGGAAAACTGAGGAGT
AATCGAAAACCCGTCAAAATGGCA
>run_-39 construct
TGGATTACACACATGAAAAGGGCATTCAAAAAGATACATCGAATCTGTATCTTTTTTCGGCC
AGAAAACGGAAAACCTGAAAAGGGGAAAACCTGAGGAGTAAATCGAAAACCCGTCAAAATGGCA
AACACAACAATGCGCTCTTAGAAAACGAGCTGAAAAGGAGAAAAGTCTTAAAGAACATTACA
CGATCGCCGAGTAAACACACATGTGTATCTCTATCCGAATCCGAAGGATCAGCTGCTGTG
CTCTTGCCTTTTTTCGAGATTATATTAGCGCAACATTAACGTCAAAATACGCATCTATT
TTGCGCACTTTATCTCGATCTCCCTATATGCCACATATCGCATAAAAAGCGGTTCAACAT
CAAAAAAAGAAAACCTGGGAGGATTACCCCGGGATTACGATTACTGGACCATGTGTGT
GCGCTCTCCCTTCCCGGTTCCACGGAGATGGTCAAGTGCAGGATCTTGGGTCAAATGT
GGGAGGTTGGAGGAATGTGTATCTCATAGATATGGATTCTGATGCAAGTACGGTAGCCCA
CCGATGTGTGCAATTTGGCTAATGAGGCGTTTATGTGCATATCTGGGAAAATCTCGA
AGGATATGTGCATGCACATACATACATATGTATGTACATAGATGTGCAAAATGTAT
TTGGAAAATGATCCAAAAGATAAAGGAGCAAAAAAATAGGAAATGGTATGCAAAATTTT
AACGTTGAAACGATTCTTGTACATTTAAAACCTCGTATACATATCTTTGAATATATCATAA
AAATGTTGTTAAACAAAAGCCAAATATAACAGTAACGTCAAAGTAGCTAAGCTCGACTGCC
AGATAACCGTTACTCTCATTTGCAGCAAAAATGGCGATATGCAGGCAGCAAAATAGTTATTA
ACAAAACAAAGTAAAATGATGACCTTTCCATCATTTTCATACATTTTTCTGACTACCCATCA
AATTTCAATCACAAGCTTATAGTAAAGCGGAAAAGTTCAAGGAGCGCCATAATGAGAGTTT
CCCCAAAGACTAAATATCGAGATTAATCCCGGAAAAGTACGCCACCTGACGCAACTCCC
ACAAGCGGAAAATCGGGGGCGGAAAACCTACTTTCCGAAGGCGTGGATGCGTGACAATA
ATTTAAAAGATCTCCAATGCAACAGCGCAAAATGGAATGAAAACAAGGTCGACGGCCGAAA
ACTAATAGCTAAAGCAAAATTCAGTCACCCCTCCCATCGTTCAACTGCCACGCCACCGC
TTAACCCTGCAGCCAGCGCCTTGAATGCGCACGCAAAATGTTTGTATGTTTGTCTGT
TGACTGTTTGCCTGTCTATTTGTTTGTGTTGTTGATTGAGACGGCTTTGATTTGCGCTGAG
CTGATTTTGTGATGGTGGACGAGGGGGTGTGCTGGGCTGCGCTGGGCGGAATGGGTGGG
TTTTGGGTTGGTTAAGACAAGTGCCTGGTGTGTTGAGAGCCGTTGTGTGCATAAGCAAC
GGCGATTATTGACACACCGCCGAGCGATGCCACAGCTACAGTGCAGTGCCTCGCATTTGGGCG
CCTTAGACCCTAAAGAGCAATTAAGCTCTGTAAAAACATAACTGAGCAGCAGTTGGTCC
AACAGAAAATAGTTGGAATAGTTAGTTACACCGACACTCTGTAGGTTGCTGGTGTGTCAT
CCGACAGGTTTACCCTGACGTCACCCCTGGAATAACGCAAAATCGAACTGCAGCGCTG
ATTTTTCGGAAGGTAAGGCCCGAAAAGTCTCGAAATCGAAATCGCCCGCCAGAGCCACGC
CCCTTTGTGAGTTGGCGGAAAACCCCTTTCTGTGCGGTCGTGCGTGAATTTAATCAAAGC
AAGACTTAAACCCACGACGCCCCCATAACCAATCGGCGTCCCTTAAACCCCATGTGAGC
CATCAATGTGGCCAAAGTTTTTGGTGTCCAAAAGTAGACGACATACAAAACACCGGAA
ATGTTGCACATTTGTAACCTCAGCACACTTTCCAGAAGGAGTTGAGCGTGTGGGAAAAG
TCGAAAACCTGCTCAACAGGGACTGAGGAGTGGACGTGAAAGTTTTCCATCCGACGCAA
GTGCAAAATTTCTGTCAATTTGTTGTAATGGAGTTTCTTTCTCCGAGCAGCAATTTG
TTTTGGTAGTGTAAATTTTTTTTACCCAAAATCAGGGGAAAAGTAGTTCAATACTGGCCTCA
CAACAACTGTTTTTCGGGATTACGAAAATTCAAAAGTTTAAATTTCCGATAAGCAACATT

```

```

TGTTGATGTTTTCGTTTTGTTATAAAAATAAATTTTAAGCAATAAAAAACAAAAGATACAAG
CACACATAAAAGTACTTATTAAGTGTAGTACTAGTACTAGTAACTTAATAATAACAC
GGCAAAGTTGTTAAGTTATCAGGTAGATAAGTTATACCAAACCTATCATACTCCACATT
TATTTAAATTTTGGGCCAGCTTTTGGATTGGGCCCACTTTGCACAGGGATGCCTCCTTC
GTTAGTTATCGATATTCCTTGCAAACAGAAGAATACGCGAAAATCAAATCAGCTGAACC
GCACAACAAATGCACGTAACAGAGAAAAACGAAAAGCAGAGGCAACGAATGGCAGAGG
ACAGCCAAAACGTTTATTTATAAATCATCACAGCGCAAGAATAAGTAATCGAAAAGA
ACACAATAAAAGCTAGAATGAAAAGCCCTAACACGAGAAGTGAC
>run_-31 construct
TGACCGTAACATCGTTTTAGTTGACTGGCACTTTAAACAAGTCCCAATATAATAGTAGCCC
TTTATAAGTTTTAACCGATTTAAAAAAAAGGTGACCCCGAGCTAAAGTTTTTCGAACCG
TTAACATACAGCAATCAAACCTTTGAGTGGATTGTAGAATGTAATGTTTGAAGAATGTGA
AGAAACCTGTCTCGTACATAACAATCTAAGTTAATAACAATGGTGACCCGAACATTA
TGTTTTAAACCATTCACCATTCAATATCGCTCTGATCAAGGAAATAAATAGTAAAAATA
TACTAAATCATAGTGCTAAACTAGGAATATAAGAAACAAATGTGGTTCAATCAGTTGCTG
ATCCCCCGCAAAGCTTAAAGTTCAAACCTCACATTGATCTTTCGATCTTTCGTGCGAA
AACCGGTTGCGAATAGCTAATTTGTGGTCAATTTAAATTTACCATAAATCGAAGCGTCGGA
ATTGGGTAATCAGTGCCTGTCTGGCCCGATGAAAATGAAACAGTTGACAGCTGTCAATC
GATTACAGGGAATGCATCAAGCATCAACTTTGATTTGTACACTACAAGAAAATAATAGTT
AAAATAAATACTAAGAGTTGTGAAAATAAATTTATATACAAATACAAATATAGTGAATA
TATAAATATATGTAATAATTTGAAATCGCTTAGTTTCCAAATTTAAAAACTATAACTATTA
TATTAATAGTAATATTTTAACTAAAAGTCGTGTTAAAAATTTACAAAAGGCCGAGC
TTACTTTTTCCGTCGTAATTTAATTTCTTCTTAAATGTTTTTCTTCTATATAACAAGCCGA
CATCGAGTTGGCGGCTTATGCAAAATGCTCACACCCAAAGGATGGAACAAGCGGAAA
ACCGAAGGTTTTTGTGATTTCCFCGAAAAGTGCCTGCGCAACTCTTTGAGGGGAAAAC
CCAACCCGCTCGTTTTTCCACTGTGCTGGTCACTTTTTATTAGACCCGAAAATAACA
GTGGCCGGCTCGTCGGGGTGGTCTGTTTTCCGTTTTCCGATCAGATCCTTTGGCATCGA
GCCGCTCGCTTTCTTGTATTTGGTCTTACGCGCACGCCCTAAAAGGGTTTTATTACA
GCCTCTGTAATAATGTAATGTCATAAAGTTCCGAGAGCAATATGACAGCAAGCTACACC
GTGAAAATATGTTGTTATGAAAAGTAAATAAGTTAGTTACGTTAAGTGGGATATG
TAAGATAAGAACTATTGTGCTTAATAGAGTTGCGGTTGCGATAAGAATTGTGATAAAGCT
ACTGATGGCTGTATTTAAATTTAAGATTATTTTTTTTAAATTTAGCCACTCATTGAAGT
TCTAAGTTCAGTGTATGCATTCAAAGTGGCAGTATATGTTTAGCGTTTTACTTAAGCGCT
TTTGAATAATGATGCCAAAATTTCTTGTATATATAACAAGATTAGTGTCTGTGTGCAT
CTTTCGAGTAATTAAGTTGGTATATTTGAAATAAATTTTTTTCGCGAGTGTACGATTTGG
ACTCAACATTTACTTTTCGCGTCGAGTGAATGAAAGGGGAAAGAGTTGCACTCAGCCTCC
TTCAGCAGTTGCAAGTGGCAGTTGCTGTTGCTGTGCTTTCGTTGGAATCATTGCGCCCTC
GACCTTCCGCTGACCCATCGACCTGGGCTAATTTACATAAACCTACGCAACATCCCAGG
AACACAACACAGTGCCTTCCCAGAAAGGTGAACCGACATCCCAGATGTTGTTCTGCACCG
AAAGAAACCTGTATGAGTGGCAACTTCAAAGAGACACATTAATGGAATGAAATGG
GTAACAATCATAAAAAATAATCAAGTAAATAGTTGGAGGTGGTCAATGCCGATTATGGA
TAAAATAATTTGATTTCTTGGACTAAAATTTATGATGCTTAAAAGCTTAACTTAATCGCAA
AAGTTGGATATTTCTAAAACAAAATTTTAGCTACTTGCCTTGGCAATGTAAGAAGTCTGA
AGTAACCGTATATAACTGAAAACATCGGTAGTGCATTTTTTCCAATGCAGTTTCGTAGTTT
TGGACCCAATTAGACCCCTACTCCCACGCACGTGCTTTTTTTGGCCCTGCCTTGTGCG
GCTCCCATTCCCTAACTTTTTCGGTTTTTTGGACGGATCCCTCTGACAGTTGCTGTTGTT
ACGGTTCACCATGACCAACGCAACAATTAACCGCGCAATTCATTGTCTCTCGATTTCC
TGGCCCTGCACATGTATGTACATATATGTACATATAAGTATAGGTTTTTTTTTATAGCT
CATTTCACATATGTCGCGAGTTGGCCCTCTTCGGGAATGACACTTCGGAACCATTTTAA
TGAGCCAAATTAAGTCAAAAAAGGAGAAGACACTGGATGCACATGTCCAGTGCCT
CGGGCGAAGTTGCCATTAGCCGTTAACCATTTGTCATTAAACATTACATTACCATTC
ACCA
>run_-17 construct
GCACCTCATTAGCAGCCGCACATTTTACGATACGCGATTTTTGCAGAGGATCCTACGGTT
ACATCATCTAGACCTGGGCCATAAATCCTGATCCGAAAGTTCGTAACAGATTCGCGTTTT
TCTGTGCTGTTTTTCGTGTAATTTGGTGAGGAAAAAACTGAGCTACAGAACTAAAAAAC
TGAACCTCAAGACTCACCGTAACCAAGGCAAGTTTCGTTATTTTTTTGTTTCGTTTCGCGT
ATTTTTTATATTTGATTTACAGTCTCGGTTTCGCGGATTCGCTTTTTCGTAATGTTGTCT
AGAGATTTTCAATTTTTCGCCAGAATTTTCTTGCCTTTTTATGACGCGTGGATATATCC
TTTTTGTGCTCGCTTTTTTGTGTTCAATTTTTCCATCCAGTTGCGTGCAGTTCCAGTTT
TTTAGGCTGACACGCGAAGATCCGTGTTTCGAGAAGGATCCTGGCCTGGATTTTTATGGC
TTACGCAATCTGAGATGCGGATCCCAAAAATCCTTAGCCGAAAATACAGGCAGAAGGCCA
ACAACAGCTGCCCGGAAAAGTGTGCGCAAAAATAAAGACCTTGTGACATAGTGAAACA
AATTTGCGAACAATAAATATATATCAATTTGTAATAAGTAGTTGTTGTTGATTCATA
ATAACGAGCCTCGAGCAGAATCTTAGCCAGCTTTATCTGAATCTAGTTTGGCGTTAGTT
TATTTATTAATTTATGATAAAGACTGGGAAGTGTACGATTCCATAGACTCTTAATTTAT
TAATACTATAAGTCGCATAAAAAATATGTTTCGTACTTACGGCATAATTATAAAAAATTAG
CGGGCGTCTTAAATAAAAAGACATCTAATTTCTGTCGGTGACCTTACTGTAAATTTAAAA
AAAAAGTCTACATATACGGGTAATAGGGTTCCCGTTGATCTGGAACAATGCGGGG
TCCTCGAGTTCTTTCTGTTTACCTTGGCTTCCGGGG
>run_-16 construct
TCTGCTCATCCATTGACTTTTTGTGTCAAATTGAGTTATTCACATTGCACATGGGCAGATT
TTGATAATGCTTCAGTGAATTGGTATCCTGTTGCGTTGTTTGACAAAAATATTTACCCA

```

```

ACTCATAATTGAAGTGTCTGCAATTTTTGCGCCATTTGTGCATGTATGCATGTCCTGGTG
ATTTTCGTTGCCATTTTGTAGCATTGAGCACTTGAGACACCCACGTTGGCAGTTGGCTGCCT
GATTATGTCGTCGAGTGTCTGCGCAAGTCTTGGGAAATCTTGTAGTACACCGAGCGGA
GTTCCCGCTGCCCTAAATTTGTTGTCATTAGGTGAGGTGTGTTTTGGGCTCTCAGTTCCGCG
CTTGTGTATGGCCAACGCAGAAAACCTGGCATTCAATCTTGCCTGAGAGCAGAAAACCTCG
AAGGACCCGAGGTGCAGGGCCACCTGCCTGGCTTTGTCTTCGATCCAGGCCATTAGTTA
ATGGTCAAATCGGCACAAAAGAGTTTTGACCAATTTGGGTGGCATCTGCCGATGAAGATG
TCTCTTTTCATGAATGGCAAATACCTTCTGAAGTCTGTAGTTCTTGCAGCCTCTTTA
AAAGTCAAGAAAACACTCGAAGAGGCACCTTGAGAACTATTAATAAATCAGGCAACATAATG
GTTAGTGCAAAATAAAAAACATAAAAAACACCAGTTATATTTATAAACCTTTTTGAACTG
TATCATAATATAATTTCTTAGCTACGCCCAATTTGATATGCCCAATTTTCCTTCCCTAAT
GCAGTCTTTGTCTGGCAAAGACGCGGATTTAGGGAACATATACGTATGTTCTGCATAT
CCCTGACTGATTTCCCATGCGGATGTGCTCGCTCCGTTTATCTTGTAGCGATTTTTCCACGACTT
AGACTTGGCATACTGAAAATCAAACAGATAAAATGCGCGCATTTTCCGCTCACGTGTGT
CACACACTGCCACAAAAACCTTTTTGCAACCCCTTTCTTTTATTTGATGCTTAGTT
TCTCTGCGCTTTTTTCCAGCCATGAAAATAAATTTGGCATTATTAGGGCAAGCGGCTCAGC
GAAAATTGATTATTGACAAGAGTGCATTAAGCGCCGTTTTATGAGCGAAAAGGAAAAGT
GCAAAGCCTGGCATTAAAGTTTCGTAATGCGGTTFCGAGCTGTCTTGAAAAATCCACGA
CACCCCGAAAAAAAACAGGACGAAGGTGGGGTCTCTATGCTGTAACTTGATAACC
TAGACGGCAACGAAGTCGGAATCTTTTTGACGAATATCTCCAGTTGACGAATATATTACT
TAAATGATATTTACTATGAATTTAAAAATGAATATACTTAATATGATATGCTTTAAAGTT
AAGACTGAAACTATAAAGAAAGACGCCCTAGAAAAACCAATCAAACTGAACTTAAAAGTT
CATACCTGTAAATTTATAAGGTAAACAAAATTCGTTGAACTTATATTTGAAATGTAATCAAT
CAAATAATAAACTCGCTCTCTTCAATTTACTAACAAAATCAAAGGCTTAAAGGTATTCTCT
ATTTCTGACTTGTATCTTGAATTTGCTTAACCCCTTCAATTTCACTCATCGCCTGCATTAA
TTATGTGAACCTGTGCGCTGTCTCCGTACAAAAGGGGTGTGAAAAACTTCTCAAAGTTGCGG
CTTGACATAATTGAACAGGTGCGCACACTTAAGGGCCCCGCATAATTAATTTCAATTAAGC
CCTTGAGAGCCGAGATCTCCAGTTCCGCGAGTTCCGCGCTCGCCTTTTTCCCGATTTTCCG
CATCTCTCCATCTCTCCATTTAGGCATTTAGCATTTCACCATTTCAGCATTTCACCATT
TGATGATTTTCCCGCATCGGCCACCTGCGTCTAATTTGTTTTAATCCTTTCACTAGCT
GTACGCCACTAATCCGGCCGAATTTTACGGGTGCCGGCGGCCGAGGGACAATGGCATCAT
CTATAAAGATGACAAATTTGCAACAACAATGACGACAATCGCGCAAGGACAAAACAGTAGT
GCCATACTCTTTTTCCGCGCCCGTTCCCGGCAGTTTTCCCTTTTCCCGCCACGTTCTCA
CTCTTTTTGCCACTATTCATAATTAGTTGACGCAATTAAGGCAGCCCCCGGTCACGA
GCAAGGACACTCTGCTCTCGCCACCCGAAAATCGAAACCGAAATCTATCTTCCAAAG
TCCACATCCCGCTCCCTTGTAGGAGGACAAC TAGGTCATCGGTCGAAATCCTGGGCGT
TGCCCTTGGCATTTTGGGATTTTGTATTACGAGTATTTGAAAAACAGCCGACCCCT
TTCGCCCAGTGATCCCGGATTGAGGATTGAGGATTCCGCACTCCTAATCCTTTGACTTT
CAGTTTGTACTTTGCTCCCAAGGATCGCCGCTAGTCCGGCTTTCCGGAAAGTGTGGCTTA
CTTTGGTTCCGCTCGGCTCTACGCATCCCAAAAACCTCGCAATTAACGCGGCTGATTTCG
>run_-10 construct
CCACATCCTTCGTCGCTTCTCTCTGTTTCTGTTGTTTCTGTTGTTGCTGTTGTTTCTA
GCCTTCTAACGAGCAGCTCACTGTTTTTGGGGTTAGACTGCGAAACTCCCACCTCATT
TTTTTATGGTGTACGAAAAAATCGCGACATGTTGGCAATAAACAGCAGGTGCCGCTGGC
AGGGATACTGAACAAAAATAAAAAATCAAAATGCAAAATAAAAAAAAACACAAAGGTAT
GGCAATTTCCGTGTGCTGCTCCAGTTTCTGACCAGTTTTTAGTGTCTATTTTTTTGGT
CGAGCAGATAAGTTCTTTATATTTGTTTTTTTTCTATTTTGGAAATTTTATGAGGTCA
GTCGAGGGGCGAGAGCCGTTGAGGATCAATCCATCATAAAGAGGCACTATGCACCACC
GCCTCAATTAGTTTGAATCTTCCGCTCCTCCAACTTTTTAGGGCGAAAAAATTCGGA
AATCCTCGACGACAGGATTTTTATGCTCGAAAAACATGCAAAAAAGTAGGACATCGAGC
CAGCAGGACGCGGGGAGGTTTATGGCTGCTCTGTTTTACGTTCTTAGGTAATTTT
TGGCCAAATTTTCAATGGGCCATGAATGAAGCAGCGCAAAAAGAGAAGGCCACGGCC
AGCACAAAAAATTTCTTCTAAGAGGCGCAGAAAAAATGCAAAATTTACGCAAGTCC
TGCGGCTTCTGGGAATTTCCGCAATTTGTAGGTGAGTCTAGCAGATTTATGAGTCTCGC
TGAGGACCTGATCTAGATCTAAATAATTTTTATGATTCTTTTTAACAAGCCGGCCATAA
AGCAGAACAGAGGGCGAGCAGG
>run_-6 construct
CGAGACGCGAGTTAATCAAGCATTTTTTGGTCAAGTTAATATTTTTTTAGCGGTTTACTCC
ATTGACAAACTTTTGCACCACTCGCTTCTATCATGCCCTCTCATTCCCACTCGATATCC
CCATCTCTTTCCGTTGTTGACCAATAACCAACCACGGTTAACAGACAAAAGGCCACAAAA
ATGCCACGAAAAATCCAAACTAAAATTTGCACACAAAACACAGAACGGCAAAACAAATGGCT
TAACCCACAGTCCGGGCGAGGCAAGCCCAAGAGAGAGAGACAGCGATATAGGAGAGT
GACAGAGACGGGAGAGAGAGAGCGTAAAAAACTGCGCAAGTGGGCATAAAAATTCAA
GGCAATTTATGCATACAAGTTGACAACCTCCAGTGAGAGGGGGTCAAGTGTGATATGGGG
TGCCGGGGCTTAACCCCAAAACATTTGCTCAAAAATACTATAGCCTACGTTTTATACAA
CTAATGTAAGTTATGTTTACATTTTCTATTTCGATAATAAGTCATATTTGATATATGTT
CTTATTAACATAAGATTAGTGACAAGTTTTAGTTTAGTTTTAGATTCAATTTTGCACATGA
ATGCCAAAAACATTTTACCAAAAGTAAGTAGTGTCTTCTGTTAGCGATTTCGATCTAAAAC
GTATATTTCAATTTTTGGTTTTTGTCTTCCGTTGACCCCAAGTGTCAATTAATGGCGCTGAGA
ACTCTTTAATGTGAGCGTTGCTTCTCTCGGTTTTATTTTTAACCTCACATCCCTGG
CTCTGTTCCCGTCTCTCTTGCACCCGTTAACCCGCTCTTTCTCTGCGGGAGATGCTTGA
AAAGTTACGACGACTTTGGCCAGAAATACAAACCAGCAAAACCGGTTTTGATTTGCAACC
CTTGGCGGGCTAAGACGGTTCAGCCAGAGGAAAAACGAAAAAGTGGGTGAAAAATATGGT

```

TTAACCCCGCCCCGTTTCGCCACTCGTGCCATCTCGCTCTGTTTCGCCAAGCACCAAG  
GGCTAAAGGACCGAAGGCCGAAAGGACCTCTCTCTCTCTGGCAAAGCCAAAGCCAAACT  
AGTTTTGTGGCCGACGCTGCCCGGCCCTTAACCCCGCGGCCACCAGTGCCGGCGGAA  
GACCACCCCTTTAACCCACTCGGTGTCTGGCTTTTCGGGGTGAAAGGAAAAGAAAATGC  
CAAGCGAACGGGGCAAGCAAAAAAGAAAAAGAAATACAAAATTGAAACATGAAACGT  
GCGCGGACAGGAGCGTTTTTCCAGACGCGCTCTCCGTTTTTCCAGCCAGATAGAGACGG  
GACGTGCCAAACGGACAGAGAGCAATACAAGCTTGGTAAAAAGAGTTGTTCATGGAGC  
CGCAACGAGCAGGGGCTCTTTTTCTGGGGTTAAGGCACTTAACCCAAGACCTAAA  
TAAACTGGTTAAGTTTTGTAAAGAAATACGAAAATAAAGAAATATTTATGTACATATATG  
CATATTTGAAACACCTTTTCGAAATAAATAAGTTCTTTTTAAATAAAATGAATTTTTAATTC  
ATCATTAGCCAACCTTATTAACGATATGTAACGATTCATATGCAAAAGCCCTTC  
TGTAAGTCTAAGCCACTGCTGAAAAAGGGAGCAAAACACAATGCAGCTGGAAAAAGTGGGG  
AAAAATGGCAGGAAAATGCAAAAAATGTGAAAAAATCAAGGAAAAGCCGGGACGAAGGC  
TCACCGAGGAGCCAAAGTCTCCCTCCGACCAATCAAGCCGACCGATGCCACGGGATACCC  
TACAACCGAATGGCGGGCATATGCCACTTCAAATGGCCGCAATTATGCGAAATACCC  
AGCCGAGTGCGTTTTTTTACATATCAAATGGGAACAGATCTAAAAACTGGTTCTGGCTT  
CCTGCCCGCTATCCAAAAGGGTGCGAATCGCATTAGGACGCACTCCTCGGGCGGACTT  
AACGGATTTCCAGCTCTAATCTGCACATGTCTGCCCATCGGAAGTTGAGGGCATGTGT  
GTGTGGGAGCGTGTCTGTATATAGCCGCGATTTTCGATATATCTAAGTATGTACAAT  
ATATACCCATTTTACAAAGCCAAAAGTTGCAGTTCAGAAGTTAGCGCCGGGAGGCATGGG  
AAAGCGGGTTTCATAATAACAAAAGGGGTGGGAGGCATTAAAAATGGAGGATCGGTT  
GGTGGGAAAACGTAATTAATCGAGGACAGATCGACCTTCTGCAGAGGGCGGCCGATGCGT  
TGAGAGCTAACCCGTTTTTAGGCATTTCAAATTCAGTTTTGTACTCAAAACAAAAATAAA  
CAGAATAAAGAAATGATCCCTATCAACACTTTTCAGTAAATTTAAAAAGGAAAAACAG  
GCAGGTCTCGAATGAAAAACCATAAATCACATGATTCGATTGATGGAAAACCTTACTATA  
AATATCAAAAGATAATATAAAACGATGCCGATGATCACGAAAAGTGTCTTTGATCAAAA  
ACAGCCAAAACATAACCGAAGAACCTTTGTTGTGCCAACAAATGTAACAACCTTGACA  
CTCCTCCGACTTTTTCTTACTGTTTTCCGTTTTTTTCGGGAGTTTTTTGTAAACAATTTGT  
AGGGGACATGTGTAACAATCGCCAGAGATCATTAGGATTTCAACGCCGATCGGACAGCTG  
CATATTTTCCCCACCAATTTTCGCCTTTCATTTTCCCTTGGCTAATGTGCGGGGCC  
CAAAAGAAAGTCCATTCAAATGGTTACGGATCGTTCCTGCCAAAAATCCATTGTTCTTA  
AGTAAATAGAGAGGGGCCAAGTCAACGAAAACGAGGAAATATATATGTATGTGCACACA  
AGGAGCACAAAATGATCGCTGAAAAATCCATGACATGTGTCCCAAGCAATCCAAGGATCCT  
GGGATTCGGCCAAGATGGAGTAGCGCACACGGGCCAAAGAACAGCTGGCAGTCGGAAAAG  
TGTGTGGAAAACCGTGGAAAGCCAGCCAAATGCATGGCCACCTAACCAAAACACAATTTG  
TGGGAGTGTGCAAAAGGCAAGAATAAAAAAAGAAAACCAAAAAAAGAAAAAAG  
GAAAAGGTAAAAAGAAAAACAGAAAGGAAACCCGAAACACACTCATTCCCGTTTTTACC  
ACACGAAAAGAAAATAAAAAACACCCCGAAGCAGAAAAAATCACTCAAACAAGCGT  
TTTCCAATGGAAAGTGGTGAACCGGCTGTGGTGAATTTTTTCCGAGGTTGAATGACGT  
CGCCAGCGGGGAGGGGATGGGAGGAGCGGTGCGAAGCCGCTGCCGACGTCGCTGCCG  
ACGTCGCTGCCGCGCAGCACTGCCAGCGCCACAACCAAAACAACAACCAATTCACCTTA  
CACAACGCCG

>run\_+3 construct

GGACCACAGCGGACAGATTGTTAAAAATTTTCAGGGTTTTAAAAATCACTACGATTTCT  
TCTCTGTATGAGCAAGAATCACTGGTCCAATGTCAGCAGAAAATATTATGGATACAATAT  
TTCTGTGTGCTTATATCTCTGTTCGCATTTGTATCTAACCACTCAAACCTAGATGGTTC  
TTCAAATATCAAAATACCTGAGTACTAAATTAATGGGAAAACCTAAGTAAAAATCAGATC  
CCATCGATCGTGATAAGCTATTTCAAATCGAATCGTTGGGGTACTCAACGATTGTTTTG  
ATTGATTAGAAAAGAGATTATTTGATGAAAGTCCAGACACTTGGATTTCCCCCCAGCT  
AAGAACCACAAATAGTTGTTATCGCTAATGCTCGGAGATAAGTTAAATGAAAAATTTAA  
TTCGCGGTTGGTTGTTTCCAAATGTTTTGGTCTGATAAATTTAATTTAGATTCTCAGTATGT  
GAGCAATTCACCGTTCGATTTTATAATCATTAAATTTTCGATTTCTGCTGGCCTGCTGG  
CCAACTGTGATAGGAAGTTCATTTTTTGAAGGGTAAATCAAATTAATAATAGGCGTTTT  
AGTTCATTAAGGTGGAATCCTAAAAAGTTAGAATCTAAGAAATATTATGAAAACCTTAAAT  
TAAAGAAAAATGGCTTTTCATTTTGATTTCAGGGATTGGATAGTTTTCAAATGTTTCGT  
AGTTAAGCTGAAAAGGATTTCTTAAAGTATCGGAAAACCTTTTGAGAAATGAAAACAA  
ATACTTCATATTTTTGTAAATACTTTTTGTGTGTGATTTTTGTTTTTTATTTGGTTTTGT  
TTCAAATTCGATTTTTGTGTTAGATCTCTTTTCGCGCTAAAACCTTATGGCTAGACAAAA  
AATGATTTCTCGCTTAGACGACTAGTTAAACATAATGATTAATAATAGCTAAATTCGCA  
TATTATCCATCGAAAAAATAGGTTCTCAAAAAAAGTTATGAGTGTACAACTAGT  
TAGCTATGTACAAATTTGTTGTTGTTGTTTTGTTGTTGAAATGAAATGAACTAAAGTTT  
GCTTTCTTGGTATTTCTTTTTGGGCTGAGTTTTTTGAGTTTTTCGTGTTTTCTGCTGGGAT  
TTGTAAAAATCTGTTGAAAATCGAGGCGCTGTGATCAAACCTCGTCGCACGATTTTAT  
GAGTCCGAGCATAAAACTTCGCGGAGTCTGATTTCCAGGATTGGGGTCTTTGTCCCTAT  
ATCCATTATCCATTATCCTCTATCCATAACTTTTGCTCAGCTAGTTGATGCTGCTGCTCC  
CGCTGCCGTTTTATCCTTCTATCCCACTGATGAGGCTGCTCC

>run\_+6 construct

AACCACAGCGAGGATTAAGCGGACAGTAAAGCGGACGCGGTGCCATTTGTTGTGACAAAT  
GTGGCTAACAAAAGCAACAGCAACACTGACTCGTTGATATTGACAACCTTTTTAATCACT  
TAATAAATTCAAATAAAATTAATGCGGTTAAGCGCCGACAAGGACAACGGCTAGCCCCAC  
CCCCACATTCCTGGCCCAATCAAAGTCCCACTCAATCACGAACCTTTTCATCCGTC  
CTCAATCAGAAATACTCAAGCGCTGACAATGAACAAAAGACTCGGAAAATGCTGTGCA  
AAGGATTCATGTTCTCGGCTCCAAAAATTTGGTTGCCCTTTTTTTTTTTGGGCAAC

```

AAAAAGTGTGTTGTCAACTTAAGCTCAAATAGTTAAGAAGTTAAGTTATAATACTAATTAC
AAAACTATTTAATTTATAATTTTAAATAAATATTTTAAAAGAGATATCTTTGATTGATG
TTCCCAAGTAAGGATATTTCCCACTTCGAACCTCTTTTACGAAAGTCGCCCTTTGAAGG
ACATTCAATTAGCGTGAATTAATTTGTGCGCAGCATTTAATTCGCAAATTAAGTGGCT
CGGTCCGAAATCATCGGCGTTTCGGCTAGGGATCTCTAATCCCCAGTCATTGCAAAAATAC
GCGACAGACTTGGATTTAGTTGAGGAAATCTCGGCTATTTGGGGATTATGTCGGAGCAGCG
ACTAATTGGAGTTGTTTCTCGGCTTCCATTTTCCGGCTCAATCTAAGCGCATTAGAAA
AGCAGAGGAAAAGCAGTCTGCGTTGCGGGTTAACGCCAAGGCCCTTAGGCTGATTTTATA
TAGGGGGATCCCCGCCAAATGTGCCTAAGTATTTGCCGTGACAGCTAACAAATTGCCA
ACATTGGCACTTAAATTTAATGCCCTTTTAAAGGCCGTTTAAAGTTTTCAGACAAT
TGACTTTGCTCGGTGACACTTTGGATTTTGGGGCAACTCAACCCCCCAAACCCACG
GCCATGGCCACATGCAATCAGCGCTGACCAACGCATTTCAATAGCACCAAATTAAGCAAA
AATCACCCAAAAAAGGAAGCAACAAAAAAGAGTCTGATTTTAGGAACCATACAGCTGC
AGTCAAGCCAATAGTTACAAT
>run_+11 construct
CCCCACCATTTCTCCAACATACACTCCTCTTCAAAAACCAAACCAAACCCCCCCCCACCA
TCGGGCTTTCCCTTGATTTCTTGCCTGCTATTGGAGCCCATTAATCATGTATGTAATGCCG
CCATAAATCCAAACAACAATTTTGGCTGCCAGCATTTGTAATAAAGCAGGGGGTGGTGGCG
TCCCGCCACTTTTCTCACCCCTCCATCTACGCCCTGACTTCAACGCCGCCCTTTT
TTGTCCACATGGCGGCTGGGCATTGCATTTTATTAATGACCAATGAAAAGTCGCGCTT
GTTGTCTGCCTTACTGACAGGAGGAAAGCGCAAAAGCGGTGATGGGGCCGAAAAATCGC
GAGAGGGGTTGGTGGAAAATGGGCGAAAATGGGGTGGTGGGGGGCGGTACATTGGGTG
GCCTTGCAATTTGCGGCGCGCATTAATTTGGCTGACAACCGCGCATGAAAACATGGCCA
TCAATACGCTCTTGTCAATGCGAGTGTGTGAGTGCTTGTGTGTGTGTGTGTGTGTGTG
TGTGCGTGTGAGTGGGTGTGTGGGTGGGTGGGTGGTCTATGGGGCTTGTATCCGTGT
AAGGCTATCGCATCTCGTGTATGTGTGTGTGTGTGTGTGTGTGTGTGTGTGTGTG
CGTGTATGCAAACGCAATATGGCGACCGCAATGCTTCCGGTATTTACAAAACGAGCTGCA
AAAAGGGGTGCGAAAATCGAGTTGGCACGGGCGCCAGTGGCGCGAAAATTCACGGGGGGT
CTTTGCCACATTCAGTGGCGAAAAAAAACCCAGCAATATCCGTAGGAAAAAGGGCAAC
AAGACGGCAAGTCCACAATAAAAATGAGTATTGAAAATAGGCCAAAAAGACGATGATA
TGTCAATATGTGAGGCAAGTGGCCATAACAACAACGGCCGCAACAATAACAACAAAACCAA
TAGAGTGATAAAAACCAACAACATGCAACAATAACAATGGCCAAGAAGGAGTGGCACA
GTTGTTAGCACTCAGACGGCCAAAAGAAATAAAATTCACCCGAAAATCATGAAAACGC
TATTACAAAACAAATAAAGTCAAAAACGAGAAAACCTTTTAAATCCTTTGAGGTC
TGTCAAAGAAATGATAAATAATTTATAAATAAATAAAGATTTGTATAAATGACT
CTTACGAAATGACACTGGCATTATAACCACTAAGTTTTTTAGTTCCCAATTTGCCTTAAG
TTGTGCGATTTTTGGATTGCATTTTGGTTTTTTTATTTATTCATATTCAATTAGACTATC
ATATTCAAAAAGGTGATGCTAAACTCTACTTCTTCTTCCAGTGTTCATTTTCTGTA
ATAAAAACAATCTCAAAATAAATAAATTTGTAACCGAATTAATTTCTTACCGCATACAAA
GGATTTTTAAAGTCCATTTTGGCAATCTAAACCGTCCAAATCGCCAACCGCGAATCCAGC
AAATTCCTGCTGAAGTTTTTGTCAATTTTCCATGGTTTTTGGCCGAAAACCGCGCACAA
CAAAAATGCGGGGTGGCAACGCGCCGCCCTGCCAATTTAACCCCATCGTTTAAACCC
TCCTAAGCCCACTTTTGTGACAGCCGATAAACAATGATTGATGAATGACAGGCAGC
GGCTAATGCACTTTTGCACCGCAGCAACGTGCGCAACTGAAAGCCGTCAAATAAATGTC
CAAAAATTTGCCAGCCGGTTGTGGAGCGGGGTGAGTCAAGTGGGGGGGTGAAAAGGTG
AAACAATTGCAGTGGCCAGACGAGGGGGTGTGGCAAGGGCAGGGGCAGGGGCAGGGGGT
CGAGTGTGGCCGAAACT
>run_+19 construct
GAGGACCAAAATAGCCCCAAGTGAAGTGAAGTGAAGTGAAGTGAAGTGAAGTGAAGTGAAGT
ACGAGAGTCTTGGGGTTGGCCAAACGCAAGTGTCTTGTCTCGGCTGCTCCTCATATTTCA
CAGACGCTCGCCGGTCCGAGGACATCGACACTTATTGTTATTAGCATCCCTGGGTG
CCGGGACCGGGCCAAAAGCCAAAAGGACCTGGCCAAACAGTGTAAACCTTGGCCGCC
GGTCTGTTGAGGCGCGTCCATTTCAAAGCCAATTACATGCGCTTTTAAAGCGTGAAGT
TTTGTAAATAGATTTGTTGGCCAGCTCGAATGTCTTGTTTTTATGAGCATGTCTTGGCC
AAGTCTCTGCTGCTCCTGGCAACTCGCAGCAGGTAATGTATTGGATTTTTAAAGAA
AGTGACTACCAAAAGTGCATGCAAGTTAATAGTTCTGCATTTCTGTGGTGTAAAGTTA
TAAAATGTTTTTTTTTAAATTATACCATAGTTATTAAGCTAAATACATTTAATATTTTAT
GTTTGGTCTAGGAATACATTATTATTATTTGGGGAATAGGCGGATTGTTGTGTGGTATA
TAGGGATATAGAAATGTGCATCTATAGGGTGGTTCATAAGGATAGGGGGTTATAGGGTTA
AGACCTACTTGAAGCACTTGCCTTTGCGCTTGGCAAATAATATTTACTCAAGTGAATTT
GCAAATTTGCGAGTACGTGAGTGAAGAATTAGAAGAAGCGAATAAAGCCATTTAAAAA
AAAGACAGCTGGGGCTAAAAATCATTATGAGCATAACATTATTTCACTTTTAGTATAAAA
AATAAACATACAAATTTGAATTAGTTTTTAACTTTACTATATCTATCATTTTATAAAAACG
TAGAGCACAGCTTGGTAATAAATCAATTCATTTATTACTCCAATAAATAATTTTACAAA
AGGTGTAATGGCAAATCGTGGAGTTCCTGTAAATTTTCAAGAGCCACCTCGTTTTCGGAC
ATTTGCTGACGAATTTCAAGAGTGTCTAAAGAAATGACATGCAAATTAAGTTTTGTTTCAA
TGACTGACAAGTTGCAAAAAGCGGGAAAGCGGGAGTGGGGCGGAAAAGACGGCGGCAA
AAGGACGAGTTGAAAGGTTAACGAATTTCCCGGAAAACGGACAGCAGAGAAGTGAACGG
TAAATCAGTTCGGAAAATACAGTTTGTCTTCCGACACAATGCAAGTGCATAAATAAACA
CGAATTTTCAAGCGTGGGGGAAAGAAAGGGTTTTTATGGCCCTCACTCCTTTGGGTTCGC
GTTTTCTGACCGAGCCCAAGGAAAAGGATTGATCCCGATCCCGATCCAGATCCCGCT
TCCTACCTGCATTTCTCGGACACGAAGTACGCCCTGCGAAAACGAAAATTTGACAAT
TTAATTAGTCAACGTTTTGGGATTATCGCTGGACACACATCGCAGGCATTAAGCTAAA

```

CAAACCGCCCCACACACTCGTCCCTCGAACACAGCAGAGGGTACAATACTAGGAGCGCTGC  
 ACTTAGATTTCCAAAGCACTAAACAGCATTTTCGAACACTCTTTGAAACTGTGGAACACGA  
 ATAGTTAAAGGATTTGGAAAATAGTGCAATTTATATGTTGCGATTTGGTGATTTACCTAT  
 GTACATGCATGTATGAAATATGCCACCATTAGCTTAATAATTTAAATTTATTTCATAAAT  
 TTCTAAATTTAAATTTATTTAAATTTCAAACCTCGTGCGGTTTGTCTGCGACCCCTGGCTGTAA  
 ACACACACATGATTTCTAATCTCGGGAGTGGGTGGTTGGGCGGTGTGCTCGTGTCTGCTGT  
 CCTGCAGCTTGTGGTTCGCCAGTTGCCGCATCTGCGATAGCGATAGCTTTTGTATCCATGCT  
 CCTGCTTAGTGGAATTTTAAATTAATAATCTGCGCGCTCATTGCTTTGACCTTTGA  
 CTTTGGCGAACCGACTTTGTGCCCCCTTTTGCAGCCCGACTGCGTGGCCGAAATTTAA  
 TTAGCTTAGCTGCTTCAGCTCCTTTGACAAGAGGCCAAAAAGAAACACTTCGCCGAGGAA  
 TCTCCGTTGGTTGCGAGAGGAGCGGGCAAAAAACAGTCGAAATTTGCATGTGCGAGTATC  
 TAACTCACTTCCGGTTCGGTTGGCATTCTCTCTGCTTTTTTCTTGCTTGGGATTTTCGG  
 ATTTTGCATTAGAAATGTGCTGGATGGACGGGCGGATTTGT

>run\_+30 construct

CTTTGGCAGACCTTTGCCTAAACCTTAACCCCGACTGCCCCACCTCTGCATTTGATCCC  
 ACGGAAATGCAAATTTGATGCGGCAAAGGAATTTCAAAATCTTTGGCCAATTCGGCTGG  
 GATTATTTCAAGATTCGGTGGTGGTTGAACGGTTAATGGAAAATATTTCCATTTGCTTTTA  
 TTAACGAATTTCCATTAATAAATAAATTTGTTAATTAATAGTAAGTAGCTCAGTGTAAAGCAT  
 TGACGTCGTGCGTTTATTAATATTTCTCAATTTTGTCTGACTTTGTTTAGAGTTAAGA  
 TTGAACCTCAGACTTATTATAAGTAGAATTGACAAGAAGTGCAGTTTCCACATTATTTCTT  
 TGAATAGACCTTTTATCTCATGCAATGACATGATATTTTCAAGGAGTATCTTGGCATCTT  
 CGAACCTTTTTTGTGAGCCATGTGAAGGGAGTGTCCCGTGCATGTTCCGTGTGCTGG  
 GACCTCAATTAGCTGGGCTGTCAACCCGCTCGGGATCTGGTTTCCGATCCGATCGGCTC  
 CATTTCGAGTCAGCTCTTAGCCTGCGGACTTTATACCTATCGCCTCGCCTGTGCGCAA  
 ATTGCAGATTTCCATTATAATGCTTAATTTTTCATTACACATCAACCCCTGTGTTGGAC  
 AACTTGTGAACATGACAATGCAATTTGAGCGAAGGCCCTCACCCACTGGCAGAAAAAAGG  
 GTACAAAAAAGTCTTAGGGTTGGCCGTGTTTTCGGAACCCCTTTTTTGTGTGCGCGC  
 CTCATAAATTTGGCCTTTGTGCGCTCAAAATTTATTGAAGTTAATATTTGTCGCCGGGAAAC  
 TGCAGGGCGAAAGGATGAAAGGGTGAATAATCGCAGCGAGCATAAATCATGCAACATATTG  
 CATAATCATCCCAAGCAGCCGCTGATTGTGCTGCCCTTCTTGGCTAATAGACTCTCTC  
 CTTTCGCTGTTGCTGTTGCTGTTGCCTTTGCTATCGCCTTTTCGCTTTTCCCTTTGCCTCCT  
 TTTTCTCCTTTTCCCTCCTTTTCGTTTCGAGTTGACCAGTTTTCGGGGCATTTTCCCTCAAG  
 TCAGCGCTGTGCGGGTATTTGCATAAATGCAATGTTGCATATTTCTGTCCGGTTTATGA  
 TGCAATTTTGAATTTCCACATTGAATGCCCGTTTACCCGCTGCGAGTTCCCGGAAAC  
 TGAGTTATGACACTCGCCCTCCAAATTTGCGAGTGGGTTCCGTTTAAATGAGAGAGTTT  
 TCCGCGGAAATGATGCTTTGCCGATGATACCTTTTTCGCTTTTGCCTTCTGTTTGTCTTA  
 CTTTTCGCCGCGCCTTTCACTTCTTCCCTTCCCTTTTGGGTTAACTTCGTCAGATCCT  
 TTGTTTTATATCTATGCAAAATAGCCCGTCTTCGAGTCCCTCTATTGTGCGCAATGTTA  
 TACAATATCGGGCATGCCTCAACCCAAAAGTGGCCAGAACAAGCAAATGGCCGAGACT  
 CAAAACCTATCCCAATACCTATTCCTATTAATCTATCCCGATTCTATTTCCCATTC  
 CGAATCGCGCTGTGCTGCTGCGCCGCTGCATTTATGGGCCATCAAAAAGCGTTTTGTGCT  
 CTCATAACTGGTAACTTTGCTTAGCCTTCGGGAAATCCTTTGAAAAGATTTTCCGAAAC  
 CCAAAACAAAAAGGAGTCTAAACACACAGCGATTTCGTAACGCCCGTTTAGCATTACACGA  
 ACTTTTTAACTCACCCCTTTTTTTTGTGAGCTGTAGTTCTTTTTTGGTTACGGCGGGCG  
 ACCGTTAATCTCTTAATTTATCAATTGAGCAAGGACAGCATTTCATTTGCATTTACGGT  
 TTCAGTTTCAATTTCAATTTGAGTTTCGCAAATTAATTTCCATAAATGCGCGACGAGTCG  
 GGTGAGAAACGTGTCAAAGGGTCTTCGAAAATCGGAACTCACGGTTAGGGGGGTTGGGG  
 GTTGGAAAAGGGTTCGGCCAGAGTTATGTTTACATAATTAATTAACAACACAAAGCCGC  
 CGAAGGAGACTGTGCACACATGTGCCCGCGAAAGTGTGAAATTTAGAGGAGCGAAGGT  
 GAAACAAAGGATCTGCTGCACAGTGGTTGAAACTCGAGTTGTAATAGTAGGTTTTAGCTA  
 CTTTTTTTTTTAAGTGAAGAGCATTATATCTGATGGAATTAAGATCAGATATG  
 TTAAGCGAAATGATTCAGTAAAGCATCTGATTCTAGAATTTAGTAGCTAATTGACCTTT  
 TAGGGAATAACTTTCTGCTAAAAGCACCTATTTTCTTACTGCATTTATTTCTCACCTCA  
 CATTCTGAGCAGCCCGCCGAAACACATTTGTTCACTGTTCGTTGTTCAATTTGTTCCATAAG  
 ATACATATAAAGTCGGAGGTATATATTGAGTTTCTTGAAGGGTGTACTGATGCTGC  
 GTGGTAATAAACTCATAAAAAGCGAACTAAAAGGGGTACATTAATAAATAAACTAAATTTGT  
 CATCTACGCACGCCAAAAGCCAAACCCACCGACAAGGCCGATAATGGTCTGAAAGGGGG  
 TGGGGCGAGTGGTGGAGCGCAAAGGGTTAACAGCAGATGCAGATACAGATACATTTACA  
 CGGTGGGCGTGCCACTTTGGCCATTTGTCATCAAGAACCAGCCGAACTGGTTCCCCACA  
 TACAGTCGG

>run\_-3 construct

CCTCGAGCGTAGGTGCCTCTCTTTTCGTTTCGCTGGTGGCTCTCTTTCTGCGAGGGGGAG  
 GGATCTTGGCGACGTATATGAATAATTTCAACTGATCGCCGTGGTGTATGGGGGATGAACG  
 GAGTACTGGTTTGTCCGTTCTCGGAGGTGCGGAATGCACAGATCGTAGTTCTGATACCC  
 ATTCATTTCCGAGGAAATTTATTCAGGAACGTACCGGTATTTGCATAAGTGAATCGTATC  
 TCACAGTTAGCAGCCTGTATCGTAGATTGATTACTAAAATACTTTTCTAAATAATCTGCA  
 CTAAGATATAGTTAGATTGCGTAAGATCGGTAAGTACAGAAGCTTTTAAATCGCACTGGA  
 AGTTTTATTTACCCTCACGACATTTGCATAGATGAAACCGTATCTTACAGATTTCAAGTA  
 GCTTGGCTACTAACTACTGTACAAAAAATATCTGCACTAAGAAATAGTCGGGAGTGATT  
 TTTTATGGTGAAGTACAGAAGTAAATTCAGCTAATTAAGCCTCGCTTTTTTGTTTTTAA  
 ATTAAGTCTCAACAGCAGTGAAGAAAAACATTGCATATATTGAGTACATGAATACAGTT  
 ACTGTGCTTAATCTCCATCGGTTAATCCCGCTAAAAGCGAAGTCTTTGAGTTTTT  
 GGTGGCCAGGTAGGCATTTCCGTATCAGATGCTCGTTGCTTATTTTTGGGAACATATT

```

TTATGGCCCGTGGCGGCGGCTAATCGGCCAAAATATTTGCGGGGCGTGTGCTTAATCCG
GGCGATTGACTTTCATAAGCAAAGGATTAAGATTGCGCGGTTGGACTACCTGTTTTGAGG
TCCGATATCAGTACATCGGATGGTACATCTGAGGGCCAGGTACGTCAAAGCCAGTAAACC
CATAGTTTTCCCACTTTTTGGGGCCGAAAAAAGCATCGGAGGGCCATAAAAAAAGGG
TTGATCCTTTTGGCTGTGTGGGCTCGTAGCGAGTTCGGTATGGAGATCAGGTAAGTGCCT
GGTGTCTCGGTGATCCCTATGAGGCGGTCTGCGGGTCTGCGATGCGCGTGTGCGGCGAG
CTCCTGTGCGAAATGGCAAGGAATCGCAGCAGGATCCAAGAAGCGACGACAGGAGCGCT
GATTTCCCGGAAACCGGCAATCGTCAATCGGCCATCGGCAATCGCGTCTTTGTCGCACG
CCCCTAAACCTGCGCTGTCTGCCATATATCCCGGGGCTATATGGTGTGAAATCGGTGT
AGGGACACGAGGTCCTTCGAGCGAGCGGCCGCGCACGTACAAAAGGCAGCGCTGCCGAT
ACACTGGATTTACTGGAAGTGTGCGTCTATAATGTCCAGCTGAGAGCGGCG
>run_-3_Kr- construct mutated bases in lower case
CCTCGAGCGTAGTGCCTCTCTTTCGTTTCGCTGCGCTGCTCTTTTCTGCGAGGGGGAG
GGATCTTTCGCGACGTATATGAATAAATCAACTGATCGCGTGGTATTGGGGGATGAACT
GAGTACTGGTTTTGTCGGTCTCCTCGGAGTGGGAATGCACAGATCGTAGTTCGTATACCC
ATTCATTTCCGAGAAATTTATTAGGAACGTACCGGATTTGCATAAGTGAAATCGTATC
TCACAGTTAGCAGCCTGTATCGTAGATTGATTACTAAAATACCTTTCTAAAATAATCTGCA
CTAAGATATAGTTTCAGATTGCGTAAGATCGGTAAAGTACAGAAGCTTTTAAATCGCACTGGA
AGTTTTATTTACCCTCACGACATTTGCATAGATGAAACCGTATCTTACAGATTCAAGTA
GCTTGGCTACTAACTACTGTACAAAAATATCTGCACTAAGAAATAGTCGGGAGTGATT
TTTTATGTTGAAGTACAGAAGTAAATTCAGCTAATTAAGCCTCGCTCTTTTTGTTTTAA
ATTAAGTCTCAACAGCAGTGAAGAAAAACATTGCATATATTGAGTACATGAATACAGGTT
ACTGTGCGCTTAACTCCCATCGGTTAATCCCGCTAAAAAGCGAAGTCTTTGAGTTTTT
GGTGGCCAGGTAGGCACTTTCGATACAGATGCTCGTTGCTTATTTTTGGGAACATATT
TTATGGCCCGTGGCGGCGGCTAATCGGCCAAAATATTTGCGGGGCGTGTGCTTAATCCG
GGCGATTGACTTTCATAAGCAAATGATTAAGATTGCGCGGTTGGACTACCTGTTTTGAGG
TCCGATATCAGTACATCGGATGGTACATCTGAGGGCCAGGTACGTCAAAGCCAGTAAACC
CATAGTTTTCCCACTTTTTGGGGCCGAAAAAAGCATCGGAGGGCCATAAAAAAAGGG
TTGATCaTTTTGGCTGTGTGGGCTCGTAGCGAGTTCGGTATGGAGATCAGGTAAGTGCCT
GGTGTCTCGGTGATCCCTATGAGGCGGTCTGCGGGTCTGCGATGCGCGTGTGCGGCGAG
CTCCTGTGCGAAATGGCAAGGAATCGCAGCAGGATCCAAGAAGCGACGACAGGAGCGCT
GATTTCCCGGAAACCGGCAATCGTCAATCGGCCATCGGCAATCGCGTCTTTGTCGCACG
CCCCTAAACCTGCGCTGTCTGCCATATATCCCGGGGCTATATGGTGTGAAATCGGTGT
AGGGACACGAGGTCCTTCGAGCGAGCGGCCGCGCACGTACAAAAGGCAGCGCTGCCGAT
ACACTGGATTTACTGGAAGTGTGCGTCTATAATGTCCAGCTGAGAGCGGCG
>ftz_ps4_activator Pick_Genes_Dev_1990
GGTACCGCCACGAGCCGGGAAGACAGTCAATAAAAACGTCACCTTCACCTCTTACACAA
ATTTACAAACGTTCTTGCAAAATCCGGGGATTAGGAACAATTCGGCGTCTCTAAAAGGTT
TTGGGCATCATGCCCTTCCGTAGTCCCGTTTGTCTAATTTAAATACCATTCTGCATT
GTTTTGGAAATGTTTCTAAAACCTGACCTAATTTACGCCACACACTTTTCGTTACAAGTC
TTTCGTTTTTATGACCCAAAATGGTAAAAGTTTCCGCGAATTTAATCATTTTTATGATG
TGAACGATTTTTTGAATAGATGTTGCGAATTCGAAAATCGGGAAATGAAAATATGATTA
AATAGCATTAGGCAATGCTTTGGTTATTTTTATGACTTAAATGAGTTAGAAT
>ftz_stripel+5 Calhoun_PNAS_2003
AGTTGTTTTGCAAAACATCAACCAGCGGATTTTACTGGTTCCTTTGACTCCTTAAAGTTA
TCAATTAGTCAACATTAACAACGAAATGCAAGGACATTTACCCGTTTCTTAAAAGTC
AACATCTCTTTTACATACGTTTCCCTTGGAAAGTTAAAGAAAAACTCAAGAACTGGTAAAAT
ATTTACGTGTAATTTGCGAAAGAGTTACGTTAACTCTTCTGTGTCCTTCTGCGAAACGA
AGTCTTTTTTATCCTTTTTATTTCGCATTCTGCTTTATTAGAGTTCCTCGGAGTCGGTCT
TAACTCATTGCGGAGCCATAAACCCCGAGATTCGCGGAAAGGGTATTCGTTGTTGGGCGGA
ATCCTTTTTCGAAACCCGGTTTCAGTCAAGGCTGCAAAGTCAATCCTTTAGCATAATCCTT
TAAATAGCCAAAATAAAGCCCGCCTTTGTCAAACAAAGCGATTCGCTGGCAGAACTCGT
ATTTGCGAATAGGCGTCCATTTGTGCCACTTAGCCGGCAGGTACCGCTCCTCAAACC
CTCGGTGCGGAGGACTCCTTGGTCTGCATCTCTATCCCTTCCACCAGCCTCAGCCATAA
CGATCGTAAAGTTATCCTTTGCAAAACGAGCATACGGTTACCGCCTTAAAGCTGGCGAA
GGAGTTACAAAGTCATAAAAACAAAACACCTTTGTCCGCGCAGCATTGTCAGTTGGCGAA
TTATCCGTTTCAGTCGCCGTGCCGAATCCTTAATCCGTGCCGTTTTTATAGCCAGTAAGT
AGATGGAGATAGTAGGAAATTCGCGATGGGCTCGTCCCTGGCGAAAGGGGAAGGAACACG
ACAGGCTAGAGCCGACTGCCAAGGATAAGCCTTTAGCTGGAAGGGATTAATTTGCATTA
TCCTTATGTTAAAGATAAACACGGAGCGGCTAATCAAAACATTAGATCAAGCGTGATAT
TCAAATTAGGTCGGTCAAGGGAAGTTTTGCAAGTTTATCGAACAAAGAGTTGTATTTGTAC
TTAAATGTTAATTTATGTACTATTTAAAATAATATATGTAATTGAAAAACATTCAGGTAG
GATAAGCAATAATGACGTTGTAAAATTTATGGATTGCAAAAACATTTGTCATAATATGTA
CCCTAATGAAATATAAATTTAATTTAGTCTGTGCTTTGGCCCTTCTATAATGCTTGCC
GGTGTAGGTAATACCACATATTTAAAATCTCAGTAAAATTTGCTGCCCGTC
>ftz_autoreg Pick_Genes_Dev_1990 distal through proximal regions of the ftz
upstream element
TCCGAAATCGGGAATAGAAATATGATTAATAGCATTAGGCAATGCTTTGGTTATTTT
TATGACTTAAATGAGTTAGAATGTAATTTTATGATTTTAAATGAAAAATATTTTATTTAA
CATATAGTAACATAAGAATTTTTTTTATTAATAATTATATATGATATATATATATATAT
AAGTATATTTATTAATATATATTTTATTTTATTAATATATATATATATATTAATTTT
TTAGCTTTTCTTAATTTAATATTTTATATATTTTATTTTGTCAAAGATAAAATTA
ACAAACCAATATTTCCGCTTCAAGCAATCCAAGCCCGGATAATAAAATGTTCTATATT

```

TCTTTCTAAAAATATATACTATTATTAATTATGTTTTATTACTATATATGTATTTATATT  
 TGAATGATTATTTGTTCAATCGAAGAAAAAATATTGCATGCAACTTTGGGGTGTTCCT  
 AGTTTTCTGAATATATTTTTTATTTTACTTTAGTTTTGTTATCTTAACAAATAAT  
 CTTAAATTTATAATATAGTTATAAACAAATGTTCAATCGTTTTTTCCAGACAAAATGTCTT  
 TTACATTCGCAGTTCAACATCTTAATCCTTTTGCGAAACATTACTGCCATTACAGTTCAA  
 TTTCTTGTGAGACGGGGCGTTGGCTAAAGGAAAGTCTGTTTTGGGTAACAGAGCGAAA  
 ATCCCTTTCGCCGCCATTTCCATCCATTTCCACCTCTGATTTCTCTGATTTCCACGGACG  
 AATCAAGGCCTACTGGGAAGGAAGACGCGTGTCTCGCATTAGACTGATGTTCTGTT  
 GAACGGGACGGGAAATGGAATGCGTGGCCGAATCGAGGACGAGGCTCGCGCTACTCGAC  
 TTGGACCGACTTGAGTCGTCTGTTTATGGATAGTAAATGCACCGTGTCTATGGGTCTTAA  
 GCGTCTTAATTGCCCGCTATCCTTCGCCGAGAGCAGCGCAATTTGGTTTCCAAGCGGA  
 AATATTATTGGCACATATAAACTATAAAACAGGCCGAGGGGGCCCCCTTCTCCTTC  
 TCTCGTTTTCTGTCCAGTTGAGTCTTCCACCTCGGATTCGAGCTCTGAGATTC  
 AAATCGAGACATCCAATGCCATCAGCGAATTCGCCGAATTTTCGAGCAGCGCGCGAC  
 TTCGATTTCCCGGCGTACGACTCGTCAGCGGAATCGCATTGACAGCCTACGCCGAATCC  
 CCGGAGACCTCCGTCCGATCATTTGTTAATGGACGTTATCCTTATTAGATGTTGATGTC  
 CACGATGTCGAATAGCTACGGGACATACATATCTACATATAAAAAGATATGCCCATGTT  
 AGGTATTAAAGATCTGATTCAGTTCATGTTTCAGCTTCATTATATATATAGATTAATAATG  
 TGAATGCTTTTATTTCTATTTCCGTTTTCATCAGTTTGCATTTTATATTTCCAAATTTGATA  
 ATCCTTTAAATTTATAAAATTTGTTATAGTGCACGGACCTTCGAGCCTGCTTAAAGAATCG  
 AAATTTAAATTTACTACACAAGGTACAAGGTATTAGGAGAATTAACATAGTTTCACATGA  
 CATTATTATCAATAGTTTTTAACTGATGACACTCTGACATTTTCAAAAAGCCATCAAT  
 CTTTGAGCTCAGTTGGAGCGTCCGTAACAGAAAGTGTAAACGAGGTCCTAGCTGAGATTT  
 AAACAATTCGAAATTTATATCTAGGGGCCATAAGCAGTACGATGCGATGATGCACACAGT  
 TCACATTTTATTACAGTTACGGGGTTCATCATTGCTAAAAGCGGACAGCAATTCGAATAA  
 GTGTGACAGGAGCAATTCAGCCTTATCCTGATGCTTCGATGTCAACACACCAGTGTCTC  
 AAGACATCGCAGGCAATTCAGGATATGTAGGACGCACAGGACCTCGAACAGAAGCCAAG  
 GACACAGGCGACGCGTGACGCAATGGGAAAATATTTGTACAAAACATTGAGGATATCTCA  
 AAAGTAGCACAGCGTTTCGGCATCCTTGACTTTGATTGGTGCCGATCCAAGGACGAAACG  
 CTATATCCACCCATTGAGACGACCTCCGGAGGAGTCTGCGTGGGCCCTCCGATCGAAGGT  
 CACCCAGAAATGCATCCTGTCTGGCTTTCTCTTCAGTCTATAGTGAATTTTAGAAACTGA  
 AGATTACTTTCATTTATCTAGA

>ftz\_zebra\_element Hiromi\_Cell\_1985

TGGCCATTAATAATACAGCATCCATAGACAACCTACTTAAATTTATAAAAACTTGAGG  
 GTTATATACAGAGTTACCGAAAAAAGCGTAAAGCTTTATATCTCAACAATATTATG  
 CTATTAATAATTTGCTGGTTTTCTGCTGTTATAGAATCATTTTTAAAGTATAACGTAAA  
 AAATAAAAATAAACTAGTATTTCATTTGAAAAATCAGCGGGCATATAATTTATATCATATT  
 TTTAAAAATTTAGGCAAAGGATGTTTGCATAAAGTTTTTACTGTTTACTAGTCATTTTGA  
 AGTGCCTTTGTTGGTTTTTAGGCAAATACCGGGCACAGGAGTGAAGTTGGGAATCGGGAG  
 TTGCGCACTTGCTTTGGCCACGAGGGCAAACAAAAGCGCAAACACCGGACCCCTCGGCCAC  
 GCGTATTCCTGATCCCAGGGATCGGACGTAATGTTATCCTTTGGCCGCCAGTGCACGGA  
 AATAAATTCGGAGGGAAAGGGCATCGGTTCCGGGAACAATGGCAGCCAGTCTTCGGTG  
 TTTTGGCGCTGGCAAAAATCCAGAGAAATTTTTAGGGAACCATAAACGGGCCGGGGAAA  
 AAGCCTCTGCCCGAAGGAACGTTTTTCAGCAACAGTTTACAGTTTTTATGCTTTATGAT  
 TATTGCAATTAGAGGGAGATCGGCTGAGAGTTCGCCCTCTCGCTCTGCGCACCTCATAG  
 GTAGGCACCTCATGGCCGTAATTACTGCAGCACCGTCTCAAGGTCGCCGAGTAGGAGAAG  
 CGCGCGGGCGGATAAATCGCGATGATAATGGGCGCGATGGGTAGGTAATAACCGCGCAG  
 CAGGTAGGCACCGTACGGATAAAGTTGCCAGGACCTCGGATAACTTCCCCTCTCCGTGCC  
 TGCAAGGACATTTCCCGGAGGGGTGGCTGCGAACAGCAGGGCGCAAAGTGTATGCGCA  
 GGGATATTTATGCGCTATAACGGCGAGCGTGTGCCGAGGGCTCTCTGATTTTGTATATA  
 TGCAGGATTCGCCGAGGACAGCTCATTCGAAACTCACAGCGTTGCGTGACATCGC  
 AGAGTTAGAGAAGAAATCTAGCAATACACATCCGATAT

>ftz\_LacC Hiromi\_Cell\_1985

GGTACCGCCACGAGCCGGGAAGACAGTCAATAAAACGTCACCTTCACCTCTTACACAA  
 ATTTACAACTTTCTGCAAAATCCGGGGATTAGGAACAATTCGGCGGTTCTCAAAGGTT  
 TTGGGCATCATGCGCTTCCGTAGTCGCGGTTTGTCTAATTTAAATTACCATTCTGCATT  
 GTTTTGAATGTTTCTAAAACTGACCTAATTTACGCCACACACTTTTCGTTACAAGTC  
 TTTGTTTTTATGACCCAAAAATGGTAAAAGTTTCCGCAATTTAATCATTTTTATGATG  
 TGAACGATTTTTGAATAGATGTTGCGAATTCGAAATCGGGAAATAGAAAATAGATTAA  
 AATAGCATTAGGCAATGCTTTGGTTATTTTTATGACTTAAATGAGTTAGAATGTAATTT  
 TAGATTTTAAATGAAAAATATTTTATTTAACATATAGTAACATAAGAATTTTTTTATTA  
 TAATATATATGTATATATATATATATAAGTATATTATATATATATTTTTATTTT  
 ATTATTTATATATATATATATTAATTTTTTTAGCTTTCTTATAATTTAATATTTTTTA  
 TATATTTTTTTTTTTGCAAAAAGATAAATTAACAAACCAATATTTCCGCTTCAAGCAAT  
 CCAAGCCCCGATAATAAAATGTTCTATATTTCTTTCTAAAAATATACTATTTAATTAAT  
 ATGTTTTTACTATATATATGATTTATATTTGCAATGATTTGTTCAATCGAAGAAAAA  
 ATATTGCATGCAACTTTGGGGTGTCTTAGTTTTTCTGAATATATTTTTTATTTATTT  
 TACTTTAGTTTTGTTATCTTAACAAATAATCTTAATTTATAATATAGTTATAACAAATG  
 TTCAATCGTTTTTTCCAGACAAAATGTCTTTTACATTCGCAGTTCAACATCTTAATCCTT  
 TTGCGAAACATTTACTGCCATTACAGTTCATTTCTGTGAGACGGGGCGTTGGCTAAAG  
 GAAAGCTGTTTTGGGTAACAGAGCGAAAAATCCCTTTCCGCCCAATTTCCATCCATTT  
 CACCTCTGATTTCTCTGATTTCCACGGACGAATCAAGGCCTACCTGGGAAGGGAAGACGC  
 GTGTGCTCGCATTAGACTGATGTTCTGTTGAACGGGACGGGAAATGGAATGCGTGGCC



GAATCGAGGACGAGGCTCGCGCTACTCGACTTGGACCGACTTGAGTCGTCTGTTTATGGA  
TAGTAAATGCACCGTGTATGGGTCCCTAAGCGTCTTAATTGCCCGGTATCCCTCGCCG  
AGAAGCAGCGCAATTTGGTTTCCAAGGCGGAAATATTATTGGCACATCATAAACTATAAA  
ACAGGCGCGAGGGGGCCCCCTTCCCTTCCCTCGTTTTCCCTGTCAGTTTCAGTTGAGCT  
CTTACCTCGGATTGCGAGCTCTGAGATTCAAACCTGAGACCATCCAATGCCATCAGCGAA  
TTCCGCCAATTTTCGAGCAGCGCGCGGACTTTCGATTCCCCGGCGTACGACTCGTCAGCG  
GAATCGCATTGACAGCCTACGCGGAACCCCCGGAGACCTCCGTTCCGATCATTTGTTAAT  
GGACGTTATCCCTATTAGATGTTGATGTCACCGATGTCGAATAGCTACGGGACATACAT  
ATCTACATATATAAAAGATATGCCCATGTTAGGTATTAAGATCTGATTCAGTTTCATGTTT  
AGCTTCATTATATATAGATTAATAATATGTGAATGCTTTTTATTTCTATTTCCGTTTCAT  
CAGTTTGCATTTTATATCCAAATTTGTATAATCTTTAAATTATTAATAATGTTATAGTG  
CACGGACCTTCGAGCCTGCTTAAAGAATCGAAACTTTAAATTACTACACAAGGTACAAGG  
TATTAGGAGAATTAACTAGTTTCACATGACATTATTTATCAATAGTTTTTAACTGATGA  
CACTCTGACATTTTTCAAAGGCCATCAATCTTTGAGCTCAGTTGGAGCGTCCGTAACAG  
AAGGTGTTAACGAGGCTCCTAGCTGAGATTAAACAATTCGAAATTTATATCTAGGGGCCA  
TAAGCAGTACGATGCGATGATGCACACAGTTCACATTTTCATTAGCTTACGGGGTATCA  
TTGCTAAAGCGGCGAGCAATTCGAATAAGTGTGACAGGAGCAATTACAGCCTTATCCT  
GATGCTTTCGATGTCACACACACAGTGTCAAGACATCGCAGGCAATTCAAGGATATGTA  
GGACGCACAGGACCTCGAACAGAGCCAAAGCACAGGCGACGCGTACGCATTGGGAAA  
ATATTTGTACAAAACATTGAGGATATCTCAAAGTAGCACAGCGTTTCGGCATCCTTGAC  
TTTGATTGTTGCCGATCCAAGGACGAAACGCTATATCCACCCATTGAGACGACCTCCGGA  
GGAGTCTCGTGGGCTCCGATCGAAGGTCACCCAGAAATGCATCCTGTCTGGCTTTCT  
CTTCAGTCTATAGTGAATTTTGAAGACTGAAGATTACTTCATTTATCTAGACATCTGGCA  
AATTCATCAAGATGATTTCCCGAGCGAGACTTAACGACTCGATCCGATCTGCGTGCAGT  
TTGATTGTTAACTCAAACAATCCCATACGCAAAAGAAATTTTGAATAATTTCGAGCA  
TCGCTACTAATTAGCCGCGGATTGAGGCAATCAAATTGATTGCCTGCGATCCGAACCAA  
GAAAACCTCAGCTGGGATCCCGAACCACCATAGACCGATTGACGCTGATACTATATA  
TAGACGGTGTATCGGAATAGTCGGGAAATTTACACCAATCTCGAGTTGTTTGTGTTT  
GTTGATAATTTTTCTCGGCCCTTTACTATTTTATTTCCAGCGGGTCTGCGCTGTTTCC  
TGTGATAATGAGTGTGATATACTCGATTGTTTTATCACCCTTCCCAAATATGTGGTA  
TTTGGTATAAATGAGAAAACCGCCGGAGGAGATCAGCAGCAACTTCAAAGGAACTGGC  
CCAGCATGTGATCATCGCAGTTTTTCTCAAGCTAGAAAACCAACAATCCCGAGACTA  
ACTGACACTGTGTATCTTATTGAGTCTTATGTAATGCCCCACTGTTGGCAGGTGCTGCA  
TTGGCCCATTTCTAATAGGCTTTTGAAGTTTCAAATATTAATCGTCTGCAGGCAGCAGGA  
TCACCAATCGATAGGCCAATAAAAACCAATACCTGTGTCTGTGTATACAGGCCAAA  
GTGCGGTATTTGGATATATGTAAAAAGCCAGCTTTACCCTATTGGCAGGTGCTGTATT  
GGGCCATTTATAACAGACTTTTGAAGCTTCAAATATTAATGTGCTGCAATCAGAAGAATC  
GCCAACCGATAACCTAATAAAAAGATAATGCCTTATTATCTGCGTAAACCAGACATATTA  
CGAATTAGTTTGACATCTCTAGACTTATATAAATGTTTAAATGGTTTGAATTACTATAAC  
TACTATAATAGTCATATGGAGAACTTATGTGCATAATTTAATCCAAAAAATGTTACGGCG  
ACAACCTCAATAATTAATAATGTTTGTGGATAATAGCATACAACTTTTTGGCAAGAAATGA  
CAGTTTAGTTTTCCTAATGATCTTGGTCACTTTGGATTGCTTGACCCAGCGCAGCTGATA  
ACGCTGCTCCGGGAAAAATAACGATGAGATTGACTTCAACAGCAGCCAGAATATATCTGT  
GGGTGGGAATTAACACATTGGCTCCTCCAGGCGCGTGCCTTTCACCTTCCCGTGCA  
TTTTATGAAAAGTCTGCCGACCGACCCACCGAACCGTCCGCTGTCTAGCTCTATACGAGT  
AGATGTGTATCTGGCTGTTAACCCCTCGGAATTGCCAAAATGTGCAACGGCATCAGCG  
AAAGAACCGCAGGAAAGATGTTGGAATCGGGGAGGGGTTCAAACCTCAAAGGATATAAG  
GGACATGGGACATGCAGCTAGTCGGGCACAATGGGATGGTCCCGATTCACTGTCAAGGTA  
ATTTATTAATTCGACAATAAAATCGCACGAGTCTTGGGACGAGCTCCGGATTGCAATTC  
TATGTTGGGTTTGGGTGCGGACTTGCATGGGGTGTGTTGTGGTTCGGACACTCGCATGTG  
GGCCTTACAACCTCAATTAAGTTGCCTGGTTCTGGATCTGAGCTCGCTGCAATTTCCGTG  
GAGAACCGGTGGCAGAAATGTTATATGACCATGTGCTAGGTTTGGATTAAAGCTTAAACAG  
AGGAATTTGTGAAATCCAATCGTTTCGAAAGTGAAGAAAGTTAAGTGCCCTTATGCCAGTA  
AACCCATCATTAATAATTTACAAAACCAACCATTCATAAACAGCTAGACAAGTTAGTTT  
AAAATCTTAGGCCATGTTTCATGTAATAAATCAACTAATTAATCTTTTTAAGGTATAAT  
TCAATAAGTATATATCTAAATCAAAGACCTAGTCAAAGTAGTAGCCCTCGCCCTTATT  
TATTGCGTTAAAAAAGGATCCTAACAATATTTAAATAAAAATGAGATGAAATTTTATG  
AAATGATTCGGTATCGAAAGAATTTATTTTTGGGGAGCTGTTTTCCCTTCTTTGATTG  
ATAGATATAAACATAAGTTATCGGATGTTTTATATCTACTTACACCCCTTATTGTTAA  
GTTTACTGCAAAACCAGAAAGGAGGCTCACATTCAGTGGCAATATAGCAATCACAGGACA  
TCGGAGAGATGCGAACTGCAGTCTCTTCTGTCAAACCTGAAAAACGCCATAAATTTTGTGG  
AACAAATGGAATCTGCCAGAGTATGCGGATGGGGTAAGGGTAGAATTCGCACATGCACACA  
TATGTCAGGAGTATCGATATGTTAGGGGTGTTCAACGGGGTGGCTAATAAAATTTATCC  
AGGCCGCTTAAGCCGATCAGAAAGTCAATGTAACACAAAAGTGGCTGAGAGATGATTGTT  
TTTTACCAGTCAATTTAGCTGAGCTGATTTCAAGTTATACCGAACCTAAGATGGAAGTA  
GATTTTTAGATTACCAGAAATAACCTTCAAGTTTCAAAGAATGAGAATAAGTAAATCGT  
GAAGCCTGTGGCATTCTTACCCTTACTGAAATGAATGTAACAGGTAGAAGGCAGCAATT  
GCAGTGTACAAAATATATATCTTGTATCCATATAAGTATAAGTATAAGAGCTATAAT  
GTTATAATTAACATGAAGATCTACGCTGTGCAAGTTTTGTGCCACAAATTTAACTCAA  
GATTACCCTCACAAGGATACATTACCATTGGCCATTAATAAAATACAGCATCCATAGA  
CAACCTACTTAAATTTATAAAAACCTTGGGGTTATATACACAGAGTTACCGAAAAAAGC  
GTAAAAGCTTTATATTCTCAACAATATTTATGCTATTAATAATTTGCTGGTTTTCTGCTGT  
TATAGAATCATTTTTAAAGTATAACGTAATAAATAAATAAATAACTAGTATTCAATTTGAA

AAATCAGCGGGCATATAATTTATATCATATTTTTTAAAAATTTAGGCAAAGGATGTTTGCAT  
 AAAGTTTTTACTGTTTACTAGTCATTTTTGGAAGTGCCTTTGTTGGTTTTTAGGCAAATAC  
 CGGGCACAGGAGTGAGTTTGGGAATCGGGAGTTGCGCACTTGCTTGGCCACGAGGGCAA  
 CAAAACAGCCAAAACACCGGACCCCTCGGCCACGCGTATTCCTGATCCCAGGGATCGGACGT  
 AATGTTATCCTTTGGCCGCCAGTGCCACGAAATAAATTCGGAGGGAAAGGGCATCGGGT  
 TCCGGGAACAACCTGGCAGCCAGTCTTCGGTGTTTTGCCTGCTGGCAAATCCAGAGAAA  
 TTTTTAGGGAACCATAAACGGGCCGGGAAAAAGCCTCTGCCCCGAAGGAACGTTTTTTCAG  
 CAACAGTTTACAGTTTTTATGTCTTTATGATTATTGCAATTAGAGGGAGATCGGCTGAGA  
 GTCGCGCCCTCTCGCTCTGCGCACCTCATAGGTAGGCACCTCATGGCCGTAATTAAGTCA  
 GCACCGTCTCAAGTTCGCCAGTAGGAGAAGCGCGGGCGGATAAATCGCGATGATAAT  
 GGGCGCGATGGGTAGGTAATAAGCCGCGCAGCAGGTAGGCACCGTACGGATAAAGTTGCC  
 AGGACCTCGGATAAATTCCTCTCCGTGCTGCAAGGACATTTTCGCGGAGGGGTGGCT  
 GCGAACAGCAGGCGGCAAGGTGTCATGCGCAGGATATTTATGCGCTATAACGGCGAGCG  
 TGTGCGAGGGCTCTCTGATTTTGTCTATATATGACAGGATCTGCCGACGAGCAGCTCATT  
 CGCAAACCTACCAGCGTTGCGTGCACATCGCAGAGTTAGAGAAGAAATCTAGCAATACAC  
 ATCCGATAT

>ftz\_-7 construct

ATGTTTCTCGTTTCGAGGTTGGAGTTGAATTCGGAGTTCGGAGTTGGCTGGCTGGCTGCCTT  
 GCTGGTGAAGGGATTGGCTTCGTTTACCCATCACCCGAGAAAATTTCCCGGGCTGAT  
 TAGCATGAGGCGTAACAGTTTTTAATTGCAGCCACATTTCCGCGAGCTCCGAATGTGCAG  
 CAACAAAAGCCTGGCAACATAATGATAGCAATACTTATCTTGCCATCAGAAAAGTCGAA  
 AAAGTTAAGCACTTTTCAATTTTTTTTGTAAACAACCACCAATGCTTCTATGCGACAGC  
 TTTCCCTCTACTGTGACTTCTTTAGATGTTTTCGGCTGGATTGATATATTTTTATTTTCGTT  
 TAAAAGATTGTTAAAAGAAAATAAATAAGAACTGAGGCACATTTTTTGTGTGCTTTATT  
 TTTTCTAGTTACAGGGATTATTTTTTCGACGATTTTAGCGGTATCATACGATACATTCCA  
 TTTTATTGTAATTTTGTGTACCCATTGACAATTTTACAAAGAATACACTCCTACAATATC  
 ACTGAACAGTTGGATAATAAAAAAACTCAGAATGTTTTTTTTAAAATGAGTGTTCATAAT  
 AAACCTTGAACGCACTCTTGCAGGTTTTTTAAGCGACAATATGTCATATAAACAATATTGA  
 TGTAGTGACATTTAAAATTTATTTGTGCTATTAATTTTTTAAATAAGTACTCCTTTTTAG  
 CTTTCATAGTTCCCGAGATCACATCGTTCATATGGACAGACGGATTGACAGATAAGCCCA  
 GATTGAATTTGGCCAGTAATCCCGATAAAGAATACGTATTCACTTTTATCCTTTGATACAT  
 ACTTTTCACTACTTTTACTCCCTTTACTCTACGAGGAACGGGAGTAATTTGGAAATGTT  
 TATTACCACTCCAGTTATTGCATTTATACAATTTACTTTGACTAGATTTTATAATC  
 AAAATATTTAATTTAAAATCCCCCGTCAATATGTCTGCTCTACATATAATTTAGACCTC  
 CCATCGGGTTTTGACTGTCCGTAGCTGTACTATCATTATCCTCCTAAGGCTGTCAAGTTA  
 TCTACGCGCTTGGAGCCATTGCAATGTCTTCGCGGAACTGCTACAAAAAATTTGTGAC  
 AATTTACACTGATCTCTGGAACCTGGTCCACAGACCCGTCCTTGACTGCCATAAAGTCAG  
 TTCCACTAAAAATCGTCGAAAAATACTCCCGTGAAGTAAAAAATAAAGCACACAAAAA  
 ATGTGCCTCAGTTCTAGTTTAGTTTCAAGAAATCTCTGTTTCGCTCGGAAGGAAAAAATG  
 GAACTAGAATACGCGGACAAATAAAAAAACGATGCGCTGTAAAAACGTTTTAGACCGA  
 ATTCACCTTTGTGTTTCGCGCATTTCTCGTCATTTGTTTTAAAAAATCGAGCATTTTTTGG  
 GTCGCGACACAAATTTTTTGCCTAGTGTCTCCAGGATTCCTCTAGATCCTGGTCTCGTTC  
 TCAGGCCGTGGCTCGTTTTCCATTTAAAATGCGCGACGCACAAAAGTTTTTACACGAAT  
 TTATGTTTTTATCGCTTTACGACCGGAGTCTAATAAAAATTTATTGAGGCTGCCGG

>ftz\_-6 construct

TGCCGGTGGTTCGTTAGGAGTTTGTCTGAGTTTCTTACCGTAGTAGGCCTCCTTTGGTAGC  
 TCAAAACTCAAACTGTAGCAAGGTCAGGTTCTCGGATAAAGCGGTATCCTGCGAAT  
 TAAGCCAGCCCAAGGACGAGCCGGTTATGCAAGTCTATGCAACGTATGGGTTTCATAA  
 TAGAGGTAATGTTTGTTTAACTGGGAAGTCTTAGTTAGCATTTGCTTGTATGGCATTG  
 TTTCTGCCCTCACCCGGTACCGCCACGAGCCGGGAAGACAGTCAATAAAACGTCACT  
 TCACCTTTACACAATTTTCAACACGTTCTTGAATCCGGGATAGGAACAATTTCCG  
 GCGTTCTCAAAAGGTTTTGGGCATCATGCCCTTCCGTAGTCCGCTTTGCTCTAATTTAA  
 ATTACCATTTGCAATGTTTTTGGAAATGTTTCTAAAAACTGACCTAATTTACGCCACACA  
 CTTTTCGTTTACAAGTCTTTTCGTTTTTATGACCCAAAAATGGTAAAAGTTCCGCGAATTT  
 AATCATTTTTATGATGTGAACGATTTTTTGAATAGATGTTGCGAATTCGGAATTCGGAA  
 ATAGAAATATGATTAATAATAGCATTAGGCAATGCTTTGGTTATTTTTATGACTTAAATG  
 AGTTAGAATGTAATTTTAGATTTAATGAAAAATATTTTATTTAACAATATAGTAACTAA  
 GAATTTTTTTTATTAATAATTATATATATATATATATATATATAAAGTATATATTAT  
 ATATATATTTTATTTATTTATTTATTTATTTATTTAATTTTTTTTAGCTTTTCTTAT  
 AATTTTAATTTTTTATATATTTTTTTTTTTTGGCAAAAGATAAATTAACAACCAATATTT  
 CCGCTTCAAGCAATCCAAGCCCGGATAATAAAATGTTCTATATTTCTTTCTAAAAATA  
 TATACTATTATTAATTATGTTTTTACTATATATATATATATATTTTGAATGATTATTG  
 TTCAATCGAAGAAAAAATATTGCATGCAATCTTTGGGGTGTCTTAGTTTTTCTGAATA  
 TATTTTTTATTTTACTTTAGTTTTGTTATCTTAACAAATAATCTTAATTTATAATA  
 TAGTTATAAACAATGTTCAATCGTTTTTCCAGACAAAATGCTTTTACATTTCGAGTT  
 CAACATCTTAATCCTTTTTGCGAAACATTACTGCCATTACA

>ftz\_-1 construct

GCGTAAGCCGATCAGAAAGTCATGTAAACACAAAAGTGGCTGAGAGATGATTGTTTTTTA  
 CCAGTCAATTTAGCTGAGCTGATTTTCAGGTTATACGCGAACCTAAGATGGAAGTAGATTT  
 TTAGATTACCAGAAATAACCTTCAGTTTTCTAAAAGAATGAGAAATAGTAAATCGTGAAGC  
 CTGTGGCATTCTTACCCTTACTGAAATGAATGTAACAGGTAGAAGGAGCAATTCAGT  
 GCTACAAAGTATATATTTCTTGATCCATATAAGTATAAGTATAAGAGCTATAATGTTAT  
 AATTAACAATGAAGATCCTACGCTGTGCAAGTTTTTGTGCCACAAATTTAACTCAAGATTA

CCACTCACAAAGGATACATTACCATTGGCCATTAATAATTACAGCATCCATAGACAACC  
TACTTAAATTTTATAAAAACCTTGAGGGTTATATCACAGAGTTACCGAAAAAAGCGTAAA  
AGCTTTATATCTCAACAATATTATGCTATTAATAATTTGCTGGTTTTCTGCTGTTATAG  
AATCATTTTTAAAAGTATAACGTAAAAAATAAATAAAACTAGTATTCAATTTGAAAAATC  
AGCGGGCATATAATTTATATCATATTTTTTAAAATTTAGGCAAAAGGATGTTTGCATAAAGT  
TTTTACTGTTTACTAGTCAATTTTGGAAAGTGCCTTTGTTGGTTTTTAGGCAAATACCGGGC  
ACAGGAGTGAGTTTGGGAATCGGGAGTTGCGCACTTGCTTGGCCACGAGGGCAAACAAA  
AGCGCAAACACGCGACCCCTCGGCCACGCGTATTCCTGATCCCAGGGATCGGACGTAATGT  
TATCCTTTGGCCGCCAGTGCCACGAAATAAATTCGGAGGGAAAGGGCATCGGGTTCCGG  
GAACAACCTGGCAGCCAGTCTTCGGTGTTTTGGCGCTGGCAAAAATCCAGAGAAATTTTT  
AGGGAACCATAAACCGGGCCGGGAAAAAGCCCTCGCCCCGAAGGAACGTTTTAGCAACA  
GTTTACAGTTTTTATGCTTTTATGATTATTGCAATTAGAGGGAGATCGGCTGAGA

>ftz\_+3 construct

GCCTGTCGTGTTCTTCCCTTTCCGCCAGGGACGAGCCCATCGCAATTTCCCTACTATCT  
CCATCTACTTACTGGCTATAAAAAACGGCACGGATTAAGGATTCGGCAGCGGCGACTGAAC  
GGATAATTCGCCAACTGCAATGCTGCGCGGACAAAGGTGTTTTGTTTTATGACTTTGT  
AATCCTTCGCCAGCTTAAGGCGGTAACCGTATGCTCGTGTTTGCGAAAAGGATAACTTTA  
CGATCGTTATGGCTGAGGCTGGTGGAAAGGATAGAGATGCAGACCAAGGAGTCTCCGCG  
ACCGAGGGTTTTGAGGAGGCGGTACCTGCCGGCTAAGTGACACAATGGCACGCTATTC  
GCAATACGAGTTCTGCCAGCAATCGCTTTGTTTTGACAAAGGCGGGCTTTATTTTGGC  
TATTTAAAGGATTATGCTAAAGGATTGACTTTGCAGCCTTGACTGAAACCGGGTTGCAA  
AAGGATTCGCCCAACAAGCAATACCCTTTCCGCGAATCTCGGGGTTTTATGGCTCGGAAAT  
GAGTTAAAGAACCCACTCCGAGGACCTCTAATAAAGCAGAATGCGAATAAAAAGGATAAAA  
AAGACTTCGTTTTCGCAGAAGGACACAGGAAGAGTTAACGTAACCTTTTCGCAATTTACAC  
GTAAATATTTTACCAGTTTCTTGAGTTTTTCTTTAACTTCCAAGGAAACGTATGAAAAGA  
GATGTTGACTTTTAAAGAAACGGGTAAATGTCCTTGCAATTTTCGTTTGTAAATGTTGACT  
AATTGATAACTTTAAGGAGTCAAAGGAACCCAGTAAAATCCGCTTGGTTGATGTTGCAAA  
ACAATAAGAGGGAATGGTATTGTCGAGTTTTTCGACTATCACCTAGTAGGATTACGAACA  
AGAAATTTCAACGTATTAATTGTGTGTGTCATCTCTGGAATCCTAGCTTATACGGAAAA  
ACTTTTAGCTGTTACATACTTTTCAACGGATCAAGTATACCCTTTTCTAATACGCGTAAAC  
GGGTTTAAATAAAAGTTGACTATTTAGAAAAATATAAACTTTCGTTGACTTATATTTCTGA  
CGCATACTGTATTTGCCAAGTAGTTTGTATTGTAGATATGATGTCACCTGAGGGCTTTT  
TTACCCAAACCACCTCGTTTTATATATTTATGGCTAATTTATATAAATGCAAAAAATGCCAC  
AAATTCGAATTTGCAAAGGATTTCTCCGTTTTTCGGTCTTTTGATTTATATCTGTTAACT  
AATTTGTCTGTCAAACTACATTTCTAGAAGGGTAGGATAGAATCTGATCTATTGAAGGTC  
TGTTCAATGTTAAATATTTATTTTATAAAAATATTTGAACAAAATGTACATGGTTTCCAAA  
TCAATTAAGTAGCACATTTGAAGCCATCTAAATCATTAAATCGACAAAAAATTTCTTTTCG  
CAGCGGCATAGATACATATCACCACTAAGCTTAACCAATGCCACCAATTCGCACCTAACA  
CTAAAGTGCCACAGATGCCACTTCGAACTCACCCACCGACCCTTTTGTCTAATGAGTC  
GGATAAATGGTGCCGGGATATATTCGACTGCACATGGATCCCTTTGCTTTGATATTGA  
TTCTGATCCGAATCCGATTCGCAACCGGGCTTTTCTTTTGGCTTGGCTTACCATAAC  
TGTACGGATGTGCAATGAAAAATTACCAATCAATGTCTCACTTCAATAGAGGAACGTGC  
AGCGG

>odd\_-3 Schroeder\_PLoS\_Bio\_2004

CGTCGGTTTGCCAGTGTGCGTTAGCTTTAGCCTCGGCGTTTGGCAATTTGTCGCGCTGTT  
GACGGTTGGCAAACAGTCGGCGAACTTTTCCATTTCAAAGTGACGGCCCGGACTCCGCCC  
ACCTTTTCGGTTCCCTCGCTTTCCGGCTGTGGAGTCGCGAGCGGTAATTAACATCATGTC  
ATAAGTGTACAAAGGCAATAAATAAATAAATAGATAAACACCAGCGGAGTGGAGACACA  
TGAAAGACACAGGCCGAATATTTCCAGCACATGATATATGGCATCGCACTGCTGACTT  
CCTGCTATATCCATTTGTTGTCGTTACTAATATTGTTACTATTGTTGTTGCGCCTGTCAA  
CACATGGCCAAAAGGATTAGCCCTCTCCCGGGGAAACACATGTCCCACTATTTGCAATG  
GGAAAACCGGAGATTTATAGTAGAGAGATCCTCCGACACTCGGAAACGAAACCAAATCG  
TAGGGATGCGGAAAGCAGGAACGATGGCCATAAAAAATAAATTTGAAAGACCTGAAACGC  
TTCTCCGCGCCAAAGGACCTGCACCAATAAAGAGTCAATGGCTCGGCCATAAAGCCATA  
AAAAACTATAAACTCTCGGCCTGCTCGCATTTAGTAGTCTGCCATTTGTTTTGCGGAGGT  
CCTGGCCTGCGAAAAAAAATCGAAAAATCGAAGTACAAATATGTAGAGCGTAAAAAATAT  
AACAAACGAGAGCAAAAAATCACAAAATCATATAAACCGAAAATGACAACTTACTTAGTC  
GCTTCTTTGGCATATAAAATCGCCAAAGACACTTCGCAGAAGACCCTTGGTTCTTGAC  
TCTCGGATCTCCGACTGTGACCCGGTTTTTAGCAATGTTCTTCTGTTTTTTTTTTTGG  
TCTGCTCTTTTTTTGGACCATTGCCATGCATATTTATGGATTTTTTTTCGTGTTTCCACG  
AATAAAATTAGATTTTTTAGAGCAGAAATGTCAGCTACGCAAGTGGCGAAGTCAATCGGTA  
ATAATTGTAATGACTTTTTTAGTGGCCATATGCCAGGGTTTTCGCTATTCCACCAAAA  
TCATTTTTTATATTAGCCGTGGAAAATAAAGTAGGGCTTTTTTTTTTGGGAATCTCGACT  
TGGTGACCTTCACTTGTAGGGAATCTCGAAGTTTTTCTTCAATCGAACGCTTTTTTGG  
CTACTGAAAGAAGTCACTGTAGTTTTTGGTGCATTCGAGGAAGTAATAGTAGTGAGGAAA  
TGTGTTTTATAAACCGACTTCTACTAAAAAATCACAGTTAGGAATCAAATGATATATGATG  
AAGGTATCCGTGCAAGTTGTAAGTAACAGAGCTATAGATTTTATGCCTTACAGATTTTCTG  
TACGCCATTTACGCTCTCTAGAAACAATTTTATATAATTTCCCAAAATGGGGGAGGGGCG  
GGCACTCGTATAATGCAGCAAAATTTTCTCAGGCATCAAGATGGAAAAGGGCCAAAAGCC  
TCGGTTCAAGCTTCGTTCAAAGGCAATTTGCAATTTTCAATGGCGAAAACGACCAACTAT  
AGCCACTGCTATAGGTAAGGAAAAAACAATTTAGTTATTGGAAAACGCTTCCAACGAA  
CTGGGCAACAACAACCTTTTCGCAACCTCG

>odd\_-5 Schroeder\_PLoS\_Bio\_2004

GCTTCCAACGAACTGGGCAACAACAACCATTTCGCAACCTCGATTTTCGCTGGCAAACGC  
 CAAAAAGTCGCTAAAATTTGTTCAAGTCCCTGGGATTCGCTGATAAATTAGGTAATCTAT  
 TGGGATCTCTTACCCAGCCGTTGACGAAGGATGTGCAGGAGTCAAGGCTGTGACGAGAA  
 AGGAAGAAGACGGGTGCACGCGCATTGTTGCGATTTGAATTGCTTGCAGAAAAGTATCTA  
 AACACACCATAAACCGCTCACGCCGCGACTCCGCGAATCGTAAACCAAGGACACCATG  
 GCCCTAAGTTGCCGCGACCAAACCAAACGCTGGCTCGTGGAAAAAGGGGTGTACCCT  
 TTAGTAGCGTAATTAAGGGGTGTGGGCGGGTGTGATTTGGGGCCGGGCAACCAGGTAGC  
 CAGGATGCCATCCGTTGTCGCTGGCATCGTAAACCGGTATCCTAGAAAACCTAACCC  
 TAAACGTTACCCGAACTGGACTTTGGCTTCGGGGCCATTGTCTTTTCGATTGCGGGTGGG  
 CGCGTCGCACTTTTACTCTTCCCGAAACGAGGTACCTATGTTTACCAGATATTCCCTC  
 GCTCACGCACGACCATCGTACCTGGAAAGCCCTATCGCTATCGCGGACAAAAGGAGTAGC  
 TAAGGGATTTGTGAACCTGGACCGAGTATCCTTCGAGCATTTCACATTCCATGTTCCGG  
 TCCTTGTCTGTTTACGTTCTGCAATTTTGTAGTGTAGCGAATCCAGGAAGGGTGTACCGCA  
 AAAGGGTTGCACTTTATTTGGCAAAATAATTAGATTGATCCGGAGGGCAGTTGACTTCTC  
 TGGTCATATTAGTGTGCGCAAGGCAACTCCCCACAACAACCCGCGATTCTCGCGATT  
 TCCTGTAGCGAATCCAACGAGCTTAGGGCTGAGTTCGGTTTTTGGTGTAGCAACTCCCCGC  
 ACGGCCAATCCTTTCCTGTATTTGTCAAAAATAATTAGATAAATCCTTTCACGGACTGGTA  
 AACAAATTCGGGCTATGATTACCACACAAGTGTAAAGCCGAAGTTCGATGTAATTTAATTT  
 AAGGATTCGTATATCTACAAGATAAATATCTATGAATATACACTCGAAATTTACAAG  
 ACTAGCTAATAAAAATATCATATCTTACCATTTTCTGGTTATTTGGATTGTTTTCAGCAA  
 TTTGATTTCCATCCGAATCCATGACTCACCTTGCAGAACTCCTCCCCATCGATTTTCGAT  
 ATCGGCGTTTGTGGGCTGTGAGTACCTAAAAAAAACCTCGTTCCCGGCTGGCTTA  
 TCGATCGGGCGGAGTCACCATATCGCATCATATCCCATTCCCATCCCCATAACAG  
 CTC

>odd\_-7 construct

GGCGACTCAAGGTCACCTGGCGTATAATTGCAATTGGATGGATGTCCAGTTTTCTCGGATA  
 AAGTTGTCCCGAGTATTTGGCAAACAGATAAATTTGTAAGTGTAGCAGCGGGATC  
 TGCAGCAACCTGCTGGATATCCAACCTGCCATGCGAGGATGTGTGTGGTCCAAGGTGAC  
 GGAGCGGGCAGTCTGGGGTTAACCGTGGACCCAGGTTGATTTAGTTGGTACCTAATGGA  
 GAGATTTGCGAGGCTGTTTCTCCGACTCAAATTAAGACATTAACGCACGGCGTTTTCTGA  
 GAAGGTTAAAGGATTACAAATAAATTTGGCTTACATATAGTAAGTAATATATACTATATAT  
 ACTCTCAGTATATGAAAGATCTTAAATCTACGTGGAGCAACTAATGTAATGTGGATGAAT  
 AGATAGTGAAGTGTGTCAAGTGGACAGGCATAAACAACCTCTGGTTTTCTCGTGAAGA  
 TACGTTTTGTACTCAAGTCTTTTTACGATTCCGACTGGCACTCCTGGGAATTGATTGTGCG  
 CGATATCTGAAACTTCCCGCTCCGAGTTTAGTTGCATCGATGTTTTGTGACAACCAAG  
 AGTGCATAAACATGGCTCCTTTCGAGGCTGTCAAACGAAACCAACAACCCGAACCTG  
 ATAAGCAGGCTTGGAAATTTTAAAGGAGTGTGGTTCTTCGATCGGTAGTGGGCTAGGACGC  
 AGAGCTGAACCTCCACGGGCGAGCCACTTGAAGTGTGCAACTATTTACTACCGTATTCGGA  
 TCTCCAGATTTCCCGAACCGGGCATTAGCCTTAAAGTAGTCGTAAGGCAACTGCGAAT  
 GCCGGCAAACCGCCAGCACTCCCCAAAACACACACTTGAGATGCAATGGAATGCG  
 ATTTATGGACCACACAGGCGTGGTTGGCCATCCGAAGATTTGACCAATAAATTTCCAA  
 TACTTAGTTGGAATGGAAAGCACTTTGCCCCAGTGCCTGAAAGTCTCTGCCACATGAATA  
 CAATGTGCAACATTAGTCTCAGGGAAAATGTAACAACCTTGGGGAGTGGAGGAGGTT  
 TTCAGAAATGAAATTCGCATCGGGTTACGGGCTATGGGTTATGGTCCATGGGTTACGA  
 ACTGGAGATCCGCTTTCTCCGCTCCAGATCATTTGGGAATTTTTTTTCGTAATTTATGGATA  
 GCGCCGCACTGTAACAGTGCCTAATAGCCGGATCG

>odd\_-1 construct

GCGGAAATGCTTACCTGGAAAGTCGACAAGTCAAAGTCATGGGAATGTACGGAATTCGG  
 AAGCAGGATAATAGGATATGCATATCCATGTTTGTGCGACTTGGGAAATATCTTATAG  
 TTGGCGGAAAATCCAACCGAAGATAGGATTTAATTCGGAAGCATAAATATGGCATGTGC  
 AATTTAAAATATTCATTAATGAGGAAAATTCGATTTTCTTGAATGCTATGAAATATTT  
 GTCTTTTTAAATGAGATATGAAAATAATTAATTAATATAGAAAGCCGAATAATAATAA  
 AAATGTAAAGATATTTAACTACAATATCCTATAAATAACAACCTACATTAATTTGATGCT  
 TCAATAAATTTTATTGAAACATTCACCCCGAGAACTTATATCTTTAACCTTTTCT  
 ATGACTTTACCTATTTCTAGTTTCCAAGCAATTTCTTCAAATATGTTAAGAAAATCGC  
 CCAATAAGTGCACCTGCTTGTCTCGATTCAATTACAAATTTAATAAATTAATCCAAAGT  
 AGTAGCATGAAGCATTTGCAATGAGGAACTCATTAAAGATGATTTGACAAGCTCGAGTGC  
 CACTTCAGTTGAAAACGGTGAAGTTCAACTATTACTTAACAACCTACTTAACAACCTGAA  
 TTACAATAAATAAATACTGAGTAAAAATAATTAATAAACTCGAAAAATAATGGTGTGTG  
 AAAGGCATACCCAAAATAACAGTAATTTGTGTACAATCCTTTAATAAAGTCTTTCAAT  
 TACATTACCATTTACCTCAAACCTGTCGTTAATTTGCTGTAAAAATATGTCGGCTTATCCT  
 GCCGAAAACCTTTTAAAGCCAAATCAATTTTCGCTACAACCGCCGTTTTCCACCCACTC  
 GAAACTTTTATCGCCATCGCTTTGAAGCGGCTAATTGAATTCAGATTAAGTGTAAAGC  
 AAAATGGGGGGGATAAAAAAACTGATTTGATTTGCAAAATTAATAATTAAGTGAAGACG  
 AATCAGGCGCAAACACAACAGGACAAATAGATTACAATATCCTGCGGCGCAGACAGCAC  
 GACATTAAGGAGCAGAGGAGCAGCGAGACTGGCGCGGAATGGGTATGGACATGGCAA  
 TGGAGGTGGAAGGGACGCGCCAGGACGACACAGGACCTTCGTGCAGCTGCTGCTCCTGCT  
 GATGGCACATGCGCTGGGAGGCTGCTTTCCGGATTGGGACTGGGATGCGGGCTGGAC  
 TCCAGCGATGGCTGCCATCAGCGGCAGAAGCAGCAGCAGCAGCAGCAGCAGCTACAGCA  
 GCAGCAGCAGCAGCAGCAGCAACGGCAACGGCAGCAGCAGCAACTACGGCAGCAACATCG  
 GCAGCAGCAGCAACACCACAATATCCAGGCTTTCGACCGCTCAGGCCAACGGTTTCCGC  
 TTGCTTACTGCTGGAACGAAAAAGCCAAAGGCACATATATCCATGCACATCCACAGGCAC  
 ATTCGGTCCG

```

>odd_+8 construct
GCAGCACCCACCCAAAAACAACAACAACAAAAACAATAACAAAAGCAGAACAAACCCGCAGT
CGAAGTCCGAGCCGAAAAAGGAAAAACAAGGTAAGTTAACTAAAAAATAAATCCG
CCGACACTGTTCGATGGCTCGATGGGATGGATGACGAGGCATCGATGAGGCCTGATGGCTT
TGACTTTGATGCCAGGGACACCCCGGCGAGCCAGGGACTCATCCCTGCTCCACCCGGCT
CGGATGCATCTCATCTCCAGTGGAGTGGATGCGGCCCGTCAATCCAGCCAGAAACGG
CGGGATCACACTGCACGAAAAGAAAAGCTCAAGCTGAGAATGCAATAATTTCAATTTAAT
CTGAAGCTAATCTGTTCAACCAATTTGAAAAGATACATCTATCTTAGCAGAACCCTCAATTT
CGATTCATTCGCAACCCCACTTTTTCGCGCAGTGCAACAATCCCGCCCTGCAGTGCATGT
CTGAGGCATGTAACGTGTAGAAAATAAATTTGTAGGCACGTTCACTGGCAAACGCCAAC
GCCAATGAGATTAGGTTGAAAGTTCAGGGGAGCCGAGGTGCGGGACAAACATATGTAATA
GTCGGGGCGTTAAATCGGGGCATAGAAGAAGAAGAAGAAGATGGGAGCCCCAATAT
CCCCCAACAGCACCCGCTCGGCCAACAAACCGATTATGAATATGAAATATCGCCCGGTC
CAAGATCATTGTTTCGGAACCTCGGAAGATCTTCTGGCCATGTGAACCCACC
>odd_-10 construct
AGTAGCGAGGGAAAGGCAGAAATTTGATATAGAACTTTTAATAAATTTGAGTTTTTTACA
AATTTTTACATTTTGTTCATAAATAAATTTACAATGCCATCCATTTTGATCTTCCTTCAG
CCCACCAAGGGTTAAGAGTCAGCTTGACTTTGTTTTCCTTTCGAAACGAGGCTTTGATTA
ATTAATAATGGAGTTGCTAGAGTTCACCTGGGGATCAGCACAGAGGACTAATTGAAATGG
CATCAATGGCTTCGCTTGGCGATCGATCTTTCAATTAGCCCCAAAACCTCCCGGGGAGAG
TGTTAGCGCTTCGGAGTGAAGCCAGTCTAATTACAGCGAGTATTTGATGAAGGGCGTGGGC
CTTTGATCTGGCGATCGGTGATCTGGGGTGTGGCCACCCATTTGATAGATAATCATGGTG
ACTGAATCGGCCCCACACATCACTGGCCATGTAATCCAAGACAAGTGTGTAATTAATAATG
CTTCAAGGGGCGCAGTTCTCGCTTTTCGATGATTTCCAGCGAAGATCTCGCGAGCCCTCG
TAAAGTATTCAAATTCAGGGGCGACGAAAAGTGTGAAAATGCGTTTTGAACGACACGAAA
GGTCGCACCCCTGACACGGCGTGATTTATGATGCCAAAACATGTGCGACCCACAAAAAAC
ACCGATCCAAGGACCTCGGCTCCCTGCCAGATGGAGGATCTCCAGGACAGCGATCTTC
GATCCCAATTTCTGATCCCTTCAGCGCCACTTGCGGGAGTGTCAAGTGTTTGTTTTCGTC
TTACATGCTATGTTGGCTATTTTCGATCCGGCTATTAGGGCACTGTTTACAGTGGCGCT
ATCCATAAATTACGAAAAAATTCCTCAATGATCTGGAGCGGAGAAAGCGGATCTCCAGTT
CGTAACCCATGAGCCATAACCCATACGCGCTAACCCGATGCGGAATTTCAATTTCTGAAA
ACTCTCTCCACTCCCCCAAGTTTGTTCATTTTCCCTGAGACTAATGTGCGACATTTGT
ATTCATGTGGCAGAGACTTTTCAGGCACCTGGGGCAAGTGTCTTCCATTTCCAACCTAAGTAT
TTGGAATTTATGGTCAAATCTTCGGATGGCCAACCGACGCTGTGTGTGGTCCATAATC
GCATTTCCATTTGCATCTCAAGTGTGTGTTTTGGGGGAGTGTGCGCGTTTTGCGCGCA
TTCCGAGTTGCTTTTTACGACTACTTAAAGGCTAATGCCCGGTTTCGGGAATCTGGAGAT
CCGAATACGGTAGTAAATAGTTGCAACCCTCAAGTGGCTGCCCGTGGAGGTTTCACTG
CGTCTAGCCCACTACCGATCGAAGAACCACACTCCTTAAAAATTCGAAGCCTGCTTATC
AGTTCCGTTTTGTTTTGTTTTGTTTTGACAGGCTGCGAAAGGAGCCATGTTATGCACTC
TTGTGGTTGTCAAAAAACATCGATGCAACTAACTCGGAGCGGGAAAGTTTCAGATATCGC
GACAATCAATTTCCAGGAGTGCAGTCCGAATCGTAAAAAGACTTGAGTACAAAACGTAT
CTTTACACGAAAAACAGAGGTTTGTATGCTTCCACTTGACAGCACTCACTATCTA
TTTATCCACATTACATTAGTTGCTCCACGTAGATTTAAGATCTTTCATATACTGAGAGTA
TATATAGTATATATTAATTAATGTAAGCCAAATTTTGTAAATCTTTAACCTTCT
CAGAAAACGCCGTGCGTTAATGTCTTAATTTGAGTCCGGAGAAAACAGCTGCAATCTCT
CCATTAGGTGACCAACTAATCGAACCTGGGTCCACGGTTAACCCAGACTGCCCGCTCCG
TCACCTTGACCACACATCCTGCATGGCAGGTTGGATATCCAGCAGGTTGTGCTGCAG
ATCCCGTGTCTAAGTGTACAAATAATTAATCTGTTTGCAAAATACTCGGGGACAACTTT
ATCCGAGAAAACGACATCCATCCAATGCAATATACGCCAGTGACCTTGAGTCCGCG
TTGGTACGAGGTTAGCCCAACCATCAGAGTTTTGGGTTTCGGAACCTGGCATATCGAATGC
CAAGGAATCTCCGAGTCTCTGAAGTGAATCTCTGCGACTAATGCTGTGATTAGCATC
TGCGTTGACAAACACAGTGAAGCGGTCCTCAAGGCGAAGATTTCTGCGTTTCAGTTTCTTCA
GTTTTTCACGCTACCGGATCAGGAACTGGGAACTGGGAACTGCGAACTGGCAACTGCGA
TGGGAAACCCCAAGATGAATAATATGGGTGATCTTATGCTAGCACCGGCTCCTC
GCTGGGACCGTTAATGCTCAAGTTGAGTCCGGGGTTCCAGGGCTTCAGGGGTTTACCGG
AGTTCCATGGGTTCCGTGGGCCAGGCGGAGGGCTACCTGCGGCTTTTCTCTGGCATTC
CTGAAATTTCTTCTTCACTTCAATTTGATGCGCTCGAGTCCGCTTTGTTAGCAGATA
TATTCACGCGTATTCGCCGAAACTCGCTAATGGTACAGCAAGTCCGATACGATGC
GAGGCGATCCGAACTGAGACATGTTTCACTTGGTCCCGCCCTGTGTTATTAATGATGG
AAATTTGAAAATACAGAAGTTCAATAATTTGCAACATCATTGGGTCTTCGATTTCTCAAC
CTTCGGCTGACTTTTGTCCCGCCGTAACAAATTTGCCAGGCAAGTTCGCCACACTTTCC
GATTCCAATACTTCAATACCGATCCGGGGCTTGA AAAACATACGCGCTCCCTGAGCAGA
TATACATATATCCCGATTCGGATACCGATCCTGAAAATATGGCTTTACGGACAGGGCCT
CTACCTACGATCCGTACAGATCCGATCGCAGCACTGCGTTTTATTTGACGAAATTTGCA
ATCAATTTGAATAGTTTCCACGAATGCGCACAAAGGCCATAAAAACGCTGCGGTGGTGAAG
GCGCAGTACAGATACGCAAACTATGAGATATTGTAACCGGCCAGAAAGGACAAAACCTTTCG
TTTTTCCAACTGCAACGGCAACGGCAACAGCTTCACTTCACTTCCGCTTGCCTGTG
TTGGCCCGTTTTATGGTCTTTTGTGCTCGTAATTCAGTGTAAAACATGCCGACTGCC
CAGTTCCTTTTGGCCATTTCCCTCCCTACCAAAAACCTGCACTCGAGGATTTGCGCGTGC
GCACCTCTCCATTTGTTTACACGGCGCGCACGCCATCTCGGCCACTCGGGACTTCCCTT
TTTTAGAGGCGTACGCCCCGAAATCCGGAATGCGGAATCAAGTAATGGACAAAACAGGATCCA
TTGTCGATTTCCCGAATTTTCGGCGCACGAATCAAGTTACTTTAACACTTGCAGGCGA
CAGCCAACTCGAAATTTGGCCTCGAAATTTGGCCTTGTCAAAGCAGCCAAAGTACTGAAA

```

TGCAAAATAGTTTTCTCCTTTCATTTTCATTTAACATATCAAATAGTAATTCAGTACGTTCT  
 TGAAGATTTCCACAATTACAATCTATCATTTAGTTTCAGTGCATTACGTTGATTAGAGCCT  
 ATTCAAATCGCTCGCTTATCGCCTGCAATCGCAGCCCTTGAAGAAAATAGACAAGTTGCAGT  
 TAAGCTCCCGTCTGCATGTTTTGTTGTCAGTTAAGCTCCCGACCAGAAAGAGCTCCTTCAAGT  
 CAAACCCCCCGATAAGCTATCGCCGATTGTCTGCCTTGTGTGGAGCAGCTTACATCAGC  
 TGGAAATCCATTGAGTGGCTCCCAAGTGGCAGTCCGGTTTCAGTGCACGTACCCAAATG  
 CCCAAACCGAATCGAATCGAATCGAATCGAAGCGATCCAAACCGAAAACCAATTCAGT  
 AGCTCGTGCAGTCCACCTTAATGCGCCCTCGGCATTGACATTGACTTTCAACATTTCG  
 GCACTCGACGAGGACAGGAACTGCAGCTCCAAGTGACCGCCACTGCAACTGCATTTTCG  
 GACTCGAGATTGGCCAGTTATCTGCTGCCAGTCTCCTCCTCCTGTTTCTCAGTTCGCTCA  
 GTGCAGCAGACAGTACCCTGCTATGTCGGGAGGCACGAGCTCGATTAGTTGCTAGGGAA  
 AGGTGTGCAGTGCAGAAAATAGGCAGTGGAAACAGATACAATCTAAACTACTCAATCTC  
 TTGAAGTAAAGAGCTCTGAGTTTCAGTAACTGCGTAGCTCATGGAATAGTAAGATTATAAA  
 TGTTTAAATTAAGGGAAATTAACCTTTTTCCAGTGTACTGTTTGCCTTTGACCGGACGTT  
 AATTGGATCACCCAGCTGGACCCAGTAGGACTACTCCCGGTTCCAATCTTGGCAGCT  
 GTCTGCCGAACGTCGCCGCTGGGCACACATGTCCTGTGATGTGTCCACCATGTGCTGA  
 GTCCTCCTTTGATTGCCTACTAATCCTGGACATCGATGCTCGGGCGACAATCGAAGTAAA  
 CAGCCAGACAAAATGGGCAACAATGAGCCGGGGCGTGTGTCCTTAAACGAGCCAAAATG  
 GATCATAACTGCGAAAATGCTCAAATGGTGAATGCTGAAATGCTGAAATCTGTGCAAAACA  
 GCGCTCTAATTAAGTCTCGCGAGAGGGTCCCATAAAAGGACCTCGCTCCAATAGCC  
 GACCATTAAAGCCGACAAATGGGGCGCGTGTCTTCTGAATTCGCTACAAGAGCACTGA  
 CTTGGATCGAGAATAAATCATTTTTGGGGGTAGTCTGCATAAAACTCTGACGTCAGCTGGT  
 TTCTGAAATGTAGTGAATTCACGACATTCAAATGAATAGAAAACAAGCTATTTACGGACT  
 TTATCGAAAACCTTATTTTTCAAATGGAAAATAAAAATCTTAAGTCAAGATAAAAATTTG  
 GGGGACCAGCGAAGGAGAAGGGCCTTGGGAACCTTCGGATCGATCCACTGTTACTAGGC  
 TCCCGATAAGCCAAGACCAGAAGTACCCTAAAAGCGTGGAGGCGTTTCCCATGTGATTTG  
 ACCTCCCCCTTTTCATGTTTCAAGAACCAAGTCTCCGACAGAAAACAGAAAACAAAACAAC  
 GC

>odd\_basal-5 construct

GGGTGGCTCCGACTCCGTTTATTACCATACGACAAAACAGCGACGCAATCGCGGTGGAGC  
 TGTATGGGGATGGGAATGGGATGATATGATGGCATGATGGTACTGCCGCCGATCGAT  
 AAGCCAGCCGGGAACGAGGTGTTTTTTTTAGGTAGCTGACAGCCACAAAGCCGCGATA  
 TCGAAATCGATGGGGGAGGAGTTTCGCAAGGTGAGTCATGGATTTCGGATGGAATCAAAT  
 TTGCTGAAACAATCAAATAACCAGAAAATGGTAAGATATGATATTTTTATTAGCTAGTC  
 TTGTAGAATTTTCGAGTGTATATCAATAGATAATTTATCTTGTAGATATACGAATCCTTA  
 AATTAATACATCGAATTCGGCTTACACTTGTGTGGTAATCATAGCCGAATTTGTTTT  
 ACCAGTCCGTAAGAGGATTTATCTAATTTTTGACAATAACAGGAAAGGATTTGGCCGTG  
 CGGGGAGTTGCTCACAAAAACCGAATCAGCCCTAAGCTCGTTGGATTTCGCTACAGGAA  
 ATCGCAGGAATCGCGGGTTTGTGTGGGGAGTTGCCCTGCGCAGCAATAATGACCAG  
 AGAAGTCAACTGCCCTCCGGATCAATCTAATTTATTTGCCAAATAAAGTGAACCCCTTT  
 GCGGATCAACCCCTTCTGGATTTCGCTACACTCAAATGCGAGACGTAACAGACAAGGAC  
 GCGAAACATGGAATGTGCAAAATGCTCGAAGGATACTCGTCCAAAGTTCACAAATCCCTTAG  
 CTACTCCTTTTGTCCGCGATAGCGATAGGGTCTTCCAGGTACGATGGTCTGCTGAGCG  
 AGGGAATATCTGTTGAAACATAGGTACCTCGTTTCGGGAAGGAGTAAAAGTGCAGCGCC  
 CCACCGCAATGCGAAAGACAATGGCCCGAAGCCAAAGTCCAGTTTCAGGGTAACGTTTAG  
 GGTAGGTTTTCTAGGATACCGGTTTTACGATGCCAGCGACAATACCGATGGCATCCTGG  
 CTACTGTTGCCCCGGCCCCGAACTCACCCGCCACACCCCTTTAATACGCTAGTAAA  
 GGGTACACCCCTTTTTCCGACGAGCCAGCGTTTTGGTTTTGGTTCGCGCAACTTAGGGCC  
 ATGGTGTCTTGGGTTTACGATTTCGCGAGTTCGCGGGCGTGACGCGTTTATGTTGTGTTT  
 AGATACTTTTCGCAAGCAATTCAAATCGCAACAATGCCCGGTGCACCCGCTTCTTCCCTT  
 TTCGTCGACAGCCCTTACTCCTGCACATCCCTTCGTCAACGGTGGTAAAGATCCCAA  
 TAGATTTACCTAATTTACGGCGAATCCCAAGGACTTGAACAATTTTAGCGACTTTTTGG  
 CGTTTTGCCAGCGAAATCGAGGTTGCGAAATGGTTGTTGTTGCCAGTTCGTTGGAAGCG  
 TTTCCAATAACTGAAATGTTTTTTCCTTACCTCATAGCAGTGGCTATAGTTGGTCTGT  
 TTTCCGCATGAAATGCAAAATGCTTTGAAACGAAGCCTTGAACCGAGGCTTTTGGCCCT  
 TTTCCATCTTGATGCCTGAGAAAATTTTGTGCTATTATACGAGTGCAGCCGCTCCCCCA  
 TTTGGGAAATTTATAAAAATGTTTCTAGAGAGCGTAAATGGCGTACTGAAATCTGTAA  
 GGCATAAAATCTATAGCTCTGTTACTTACAACCTGACAGGATACCTTATCATATACATT  
 TGATTTCAACTGTGATTTTTTAGTAGAAGTCTGGTTATAAAACACATTTCCCTCACTACT  
 ATTACTTCTCGAATGCACAAAAACTACGATGACTTCTTTCAGTAGCCAAAAGACGTTT  
 GATTCGAAGGAAAAAATTCGAGATTTCCCTACAAGTGAAGTCAACAGTTCGAGATTTCC  
 AAAAAAAGAGCCCTACTTTATTTTTCCACGGCTAATATAAAAAGTGAATTTGGTGGAAATA  
 GCGAAACCCCTGGCATATGGCCCACTAAAAGTCATTTTACAATTTATACCGATGACTTC  
 GCGCACTGCGTAGCTGACATTTCTGCTCTAAAAAATCTAATTTTTATTTCGTGGAAACACGA  
 AAAAAATACCATAAAATATGCATGGCAATGGTCCAAAAAAGAGCAGACCAAAAAA  
 CAGAAAGAACATTTGCTAAAAACCGGGTACAGTCCGGAGATCCGAGAGTCAAGAACCAAG  
 GGCTTCTGCGAAGTGTCTTTGGGCGATTTTATGATGCCAAAGAAGCGACTAAGTAAGTT  
 GTCATTTTCGGTTTATGATGATTTTGTGATTTTTTGTCTCTGTTGTTATTTTTTACGC  
 TCTACATATTTGTAATTCGATTTTTCGATTTTTTTTTTCGACGGCCAGGACCTCCGCAAAAC  
 AATGGCAGACTACTAATGTCGAGCAGCCGAGAGTTTTATAGTTTTTTATGGCTTTATGG  
 CCGAGCCAAATGACTTCTTTTATTTGGTGCAGGTCCTTGGCGCGGAGGACGTTTCAGGTC  
 TTCCAAATTTTTTTATGGCCATCGTTCCTGCTTCCGCATCCCTACGATTTGGTTTTCC  
 GTTTCAGGAGTTCGGAGGATCTCTACTATAAATCTCGCGTTTTCCACATGCAAAATAGT

GGGACATGTGTTTTCCCGGGGAGAGGGCTAATCCTTTTGGCCATGTGTTGACAGGCGCAA  
 CAACAATAGTAAACAATATTAGTAAACGACAACAATGGATATAGCAGGAAGTCAAGCCAGTG  
 CGATGGCATAATCATGTGCTGGGAAATATTCGGCCTGTGCTTTTCATGTGTCTCCACTC  
 CGCTGGTGTTTATCTATTTATTTATTTATTTATTTGCTTTGTACACTTATGACATGATGTTAA  
 TTACCGCTCGGACTCCACAGGCCGAAAGGCAGGGAACCGAAAGGTGGGCGGAGTCCGG  
 GCCGTCACTTTGAAATGAAAAAGTTCCGCGACTGTTTGCACCGCTCAACAGCGGCGACA  
 ATTGCCAACCGCGAGGCTAAAGCTAACCGACTGGCAAACCGACGGTACATCCGATCC  
 GATGTTGGAACGGATCGAAAATCAAAAATCGACAATCCGAGAGTTCAGACACACGCACT  
 CTGGGAAAAACGTCCTGCAGCAGGACCTTTGCCTATTGATTACAGCTGTTTTGATCATG  
 GCTCGCCGCGCTTGGGAAAGTTGTACTAAATGTTGTGTACATATTGCTTAATTTAATC  
 ACCCAAAGTCAATCCTGCCAAGGACCGCTTGTGACGGAGTGTGTCGCAATGGCTTAGTC  
 TCAGGATCCTAAGTCCGTATACGGGTAACCAGTCAATGGGAATGTTTCTTGTTTTGC  
 AAGTTAAAGGATTAGTCGAGATCCATTGCGGAAATGCTTTCACCTGGAAGTTCGACAAGT  
 CAAAGTCATGGGAATGTACGGAATTCGGAAGCAGGATAATAGGATATGCATTATCCATGT  
 TTTGTCCGACTTGGGAAATATCTTATAGTTGGCGGAAATCCAACCGAAGAATAGGATTT  
 AATTCGGAAGCATAAATATGGCATGTGCAATTTAAAACCTATTATTAATGAGGAAAAATTC  
 GTATTTCTTGAATGCTATGAAATATTTGTCTTTTAAATGAGATATGAAAAATATTAAT  
 TATATAGAAGCCCGAATAATAATAATAAAAATGTAAGATATTTAACTACAATATCCCTA  
 TAAATAACAACCTACATTAATTTGATGCTTCAATAAAATTTGATTGGAACATTCACCCG  
 CAGAACTTATATCTTTAACCTTTTCCCTATGACTTTACCTATTCTAGTTTCCAAGCAAT  
 TTCCTTCAAATATGTTAAGAAAACCTGCCATAAAGTGCACCTGCTTGTCTCGATTCAAT  
 TACAATTTATTAATAATTATCCAAGTGAAGTACATGAAGCATTTCGAATGAGGAACCTA  
 TTAAGATGATTGACAAGCTCGAGTCCGACTTCAGTTGAAAACGGTGAAGTTCAACTA  
 TTACTTAACAACCTACTTAAACAACCTGAATTACAATAAATACAATACTGAGTAAAAATAAT  
 AAAAAACCTCGAAAATAAATGGTGTGTGAAAGGCATACCCAAAACCTAACAGTAATTTG  
 TACAATCCTTTTAAATAAGTCTTTCAATTACATTACCATTACCTCAAACCTCGTCTTAAT  
 TTGCTGTAAAATATGTCGGCTTATCCTGCGGAAACCTTTTAAAAGCCAATCAATTTT  
 CGCTACAACCGGCGTTTCCACCCACTCGAAAACCTTTATCGCCATCGCTTTGAGCGGCT  
 AATTGAATTCAGATTAAGTGTAAAGCAAAATGGGGGGAATAAAAAAACCTGATTTGT  
 ATTCAAAATTAATAATTAAGTGAAGCAATCAGGCGCAACACAAACAGGGACAATAGA  
 TTACAATATCCTGCGGCGCAGACAGCAGCATTAAAAAGGCACGAGGAGCAGCGAGAGC  
 TGGCGCGGAATGGGTATGGCATGGCAATGGAGTGGAGGGACGCGCCAGGACGACACA  
 GGACTTCGTGCAGCTGCTGCTCCTGCTGATGTCACATGCGCCTGGGAGGGCTGCGTTTC  
 GGGATTGGGACTGGGATGCGGGCTGGACTCCAGCGATGGCTGCCTGCCATCAGCGGCAGA  
 AGCAGCAGCAGCAGCAGCAGCTACAGCAGCAGCAGCAGCAGCAGCAGCAACGGCAACGGC  
 AGCAGCAGCAACTACGGCAGCAACATCGGCAGCAGCAGCAACACCAACAATATCCCAGGC  
 TTGCGACCGCTCAGGCCAACCGTTTCCCGCTTGTCTTACTGCTGGAACGGAAAAAGCCAAGC  
 ACATATATCCATGCACATCCACAGGCACATTCCGTCCGAGCCACATCCATGGGATAGTAG  
 ATACCGAACCGTGAAGGCCAATCCGAGAGCAGCAGGTAGGCGTGGACGTATCTACCATTT  
 CCAAACAACCTTCAACCCCGCCACAGGCAGCTGCCGTTGGTCCGGCCGCTCGCCACCCTCG  
 TCGCCCTCCTCCGACTTCTCGGCCGTTCAAACCGGGTCCGCCCTGCCAGCAGTTGCAG  
 TCAAGTTAATAACGAGCGCTACTCCCAACAGCAACATCGCTCAGCGGCAGCAGCAGCA  
 GCAAAAGCAAAAGCAAAAGCAACACTAACAACAGCAACACGAGTCACTCAAACGTGGAAG  
 CGAGACAGGAATATCAGCACTCCACTCGCTCGTTTCACTTCGATTCTCAAGCGTTTGGAG  
 TCGGAGAGCGGCAACGGCCAACGAATTCAGTTTGTGTGCGAGACGTTGTCCGGTGGCAGCT  
 CGCATCCAAAAGAACGCTCAGTCACTGGGAAATATACTGAGAAAAGATACATTCTGTAGA  
 TACAAGTGCCTAAGCCAAAGTGAACCGTGCAGTTGCGCGCAACTAAACAATTTTAAAGCCAAA  
 TAAAACCTACACAAGGCCAACAAAGACAGTATAATGCTTCCACATCGGCCTCACCCATCA  
 GCAACATAACCGTGATGACGAGCTCAACTTAAGCAGAGAACAGGTGGGTTCAAGTTCA  
 AAACCTGGCTCAGAACAACTTGGCAATGCCGACGGCAAAGCGCATTACTCTCTAGCACTT  
 TTTGACTAGTTTCAAAAAATGTTCCATTAATATTTGAAAGTAGTCTCACATAGCATTGCA  
 TTTATATGAATTTGAAAACTAACCGTGGGCATTTCTATTCTTCTTTTATAGACTTTGCTG  
 AAGAGGATTTATAGTGATCAAGGAGGAGCGGAGACAAGTCTCTCCCCATGCTGACG  
 >odd\_basal-1 construct  
 GCGGAAATGCTTACCTGGAAAGTCGACAAGTCAAAGTCATGGGAATGTACGGAAATTCGG  
 AAGCAGGATAATAGGATATGCATTATCCATGTTTGTGCGACTTGGGAAATATCTTATAG  
 TTGGCGGAAAATCCAACCGAAGAAATAGGATTTAATTCGGAAGCATAAATATGGCATGTGC  
 AATTTAAAACCTATTCATTAATGAGGAAAATTCGTATTTTCTTGAATGCTATGAAATATTT  
 GTCTTTTAAAATGAGATATGAAAAATATTAATATATAGAAGCCGAATAATAATAATAA  
 AAATTTGTAAGATATTTAACTACAATATCCTATAAATAACAACCTACATTAATTTGATGCT  
 TCAATAAATTTGATTGGAAACATTTCAACCCGAGAAGTTATATCTTTTAAACCTTTTCT  
 ATGACTTTACCTATTTCTAGTTTCCAAGCAATTTCTTCAAATATGTTAAGAAAACCTGC  
 CCATAAAGTGCACCTGCTTGTCTCGATTCAATTACAATTTATTAATAATTATCCAAGTG  
 AGTAGCATGAAGCAATTTGCAATGAGGAACTCATTAAGATGATTTGACAAGCTCGAGTCCG  
 CACTTCAGTTGAAAACGGTGAAGTTCAACTATTACTTAAACAACCTACTTAAACAACCTGAA  
 TTACAATAAATAACAATACTGAGTAAAAATAAAAAAACTCGAAAAATAAATGGTGTGTG  
 AAAGGCATACCCAAAACCTAACAGTAATTTGTGTACAATCCTTTTAAATAAGTCTTTCAAT  
 TACATTACCATTAACCTCAAACCTCGTCTAATTTGCTGTAAAATATGTCGGCTTATCCT  
 GCCGAAAACCTTTTAAAAGCCAATCAATTTTCCGCTACAACCGGCGTTTCCACCCACTC  
 GAAACTTTTATCGCCATCGCTTTGAAGCGGCTAATTGAATTCAGATTAAGTGTAAAGC  
 AAAATGGGGGGGAATAAAAAAACTGATTTGTATTGCAAAATTAATAAATTAAGTGAAGC  
 AATCAGGCGCAACACAAAACAGGACAATAGATTACAATATCCTGCGGCGCAGACAGCAC  
 GACATTAATAAGGCACGAGGAGCAGCAGAGCTGGCGGGAATGGGTATGGACATGGCAA

```

TGGAGGTGGAAGGGACGCGCCAGGACGACACAGGACCTTCGTGCAGCTGCTGCTCCTGCT
GATGGCACATGCGCCTGGGAGGGCTGCGTTTCGGGATTTGGGACTGGGATGCGGGCTGGAC
TCCAGCGATGGCTGCCATCAGCGGCAGAAGCAGCAGCAGCAGCAGCAGCTACAGCA
GCAGCAGCAGCAGCAGCAGCAACGGCAACGGCAGCAGCAGCAACTACGGCAGCAACATCG
GCAGCAGCAGCAACACCAACAATATCCCAGGCTTGCAGCCGTGAGGCCAACGGTTTCCGC
TTGCTTACTGCTGGAACGGAAAAGCCAAAGGCACATATATCCATGCACATCCACAGGCAC
ATTCCGTCGGAGCCACATCCATGGGATAGTAGATACCGAACCGTGGAGGCCAATCCGAGA
GCAGCAGGTAGGCGTGGACGTATCTACCATTTCAAAACAACCTCAACCCCGCCACAGGCA
GCTGCCGTTGGTCGGGCCGCTCGCCACCCTCGTCGCCCTCCTCCGCACTTCTCGGCCGGT
TCAAAAACGGGTCGCCCTGCCAGCAGTTGCAGTCAGTTATTAACGAGCGCTACTCCCAAC
AGCAACATCGCTCAGCGGCAGCAGCAGCAGCAGCAAAAGCAAAGCAAAGCAACACTAA
CAACAGCAACACGAGTCACTCAAACTGGAAGCGAGCAGGAATATCAGCACTCCACTCG
CCTCGTTTCACTTCGATTCTCAAGCGTTTGAGTCGGAGAGCGGCGAACGGCCAAAGCAATT
CAGTTTGTGTCGAGACGTTGTTCGGTGGCAGCTCGCATCCAAAAGAACGCTCAGTCAGCTG
GGAAATATACTGAGAAAAGATACATTTCGTAGATACAAGTGCTAAGCCAAAGTGAACCGTG
CAGTTCCGCAACTAAAACAATTTAAGCCAAATAAACTACACAAGGCCAACAAAGACAG
TATAATGTCTTCCACATCGGCCACCCATCAGCAACATAACCGTGGATGACGAGCTCAA
CTTAAGCAGAGAAACAAGTGGGTTCAAGTTCAAACTGGCTCAGAACAACCTGGCAAATG
CCGACGGCAAAGCGCATTACTCTCTAGCACTTTTGTACTAGTTTCAAAAAATGTTCCATT
AATATTTGAAAGTAGTCTCACATAGCATTGCATTTATATGAATTGAAAATAACCGTGGG
CATTCTATTCTTCTTTTGTAGACTTTGCTGAAGAGGATTTATAGTGATCAAGGAGGA
GCGCGAGACAAGTCTCTCCCCATGCTGACG

```

>odd\_basal construct

```

CGTCAGCATGGGGGAGAGACTTGTCTCGCGCTCCTCCTTGATCACTATGAAATCCTCTTC
AGCAAAGTCTAAAAGGAGGAATAGAAATGCCACCGTTAGTTTCAATTCATATAAAT
GCAATGCTATGTGAGACTACTTTCAAATATTAATGGAACATTTTGTGAAACTAGTCAAAA
AGTGCTAGAGAGTAATGCGCTTTGCCGTCGGCATTGGCAAGTTGTTCTGAGCCAGTTT
GAACCTGAACCCACTTGTCTCTGCTTAAGTTGAGCTCGTCATCCACGGTTATGTTGCT
GATGGGTGAGGCCGATGTGGAAGACATTATACTGTCTTTGTTGGCCTTGTGTAGTTTTAT
TTGGCTTAAAATGTTTGTAGTTGCGCAACTGCACGGTCACTTTGGCTTAGCACTTGTAT
CTACGAATGTATCTTTTCTCAGTATATTTCCAGCTGACTGAGCGTTCTTTGGATGCGA
CGTGCCACCGACAACGTCCTGCACAAAACCTGAATTCGTGGCCGTTGCGCCCTCCTCCGAC
TCAAAACGCTTGAGAATCGAAGTGAACAGGCGAGTGAGTGCTGATATTCCTGTCTCGC
TTCCACGTTTGTAGTGACTCGTGTGCTGTTGTTAGTGTGCTTTTGCCTTTGCTTTTGTCT
GCTGCTGCTGCTGCCGCTGAGCGATGTTGCTGTTGGGAGTAGCGCTCGTTAATAACTGAC
TGCAACTGCTGGCAGGGCGACCCGTTTGAACCGGCCGAGAAGTGGCGAGGAGGGCGAC
GAGGGTGGCGAGCGGCCGACCAACGGCAGCTGCCTGTGGCGGGTTGAAGTTGTTTGA
AATGGTAGATACGTCCACGCTACCTGTGCTCTCGGATGGC

```

>prd\_+4 construct

```

CCCCAAAAGGACCAACCGAAATGTTTGCCAATACGGCTGGAACTGTTTGGGCAGATCGT
GGTGTGCAAGTGTAGCTGCTAACAAATGGGTTTTAGAGATTTGTGAATATAACGATCCCA
GTAACCTCAATCAATCTTCAATGTGGGATGCTCTAAAAGTAGAACTAGCATGTCTTTTCT
ATGAATGAAAATTAATAATTTATTCGAATTTGTTGTCATATCTTTATTTAACTTAAA
ATGTAAGTCTGCACTTCTGAAAGCTTTAATTTATTTCAAAATTTTTTAAATCGTTTCC
TTGGGTTTAAAGTACATTTTGTATTTTTCTTTTCGTTTTCTTTATTTAAATTAAGAAC
TAATAATTAATTTAAATTTATTTATTTATTTGATATTATAAACAACCTGAAACTGT
ATATTTCTTACGTTGATTTCTAATTTCTTACTGAATTAGTCTTAAATGCACAAAATGTATAC
ATATCAATTTGATTTCTATAATTTGATTTAAGACCCTGCATTAATAATCTCATGATTGT
CTCATTCAATTTGAGCGTTTGTGTTACCATCTCCGTAATCCGTCTAGTTTCCATTTATATC
CTTGACTTATAGACTTTTCACTCCGCTCGCATATCGCGATGCCACAGTTTGTCTTGCAC
AGGACACCTCATTAGCAGGGATTATCGCTGCAGCTCGAACTCGGGGAAAGGACTCTAG
CCAAAGGACTTTACGAAGCGCAATCTCTACCTGACTTTGACTCGGCTTGATTGACGGACG
AACTGACTGACTGACTGACCGATTGCCTGCCTGAGTGAAGCTAAGCCTTTCCTACGCTG
CTGGCTTAACTCTTGCCTGCAAAAGGACCTATTATCCTGCACGAAAGGGGTTTCATGTCC
CGGCTGAGCGATGAACACCGCGCACGAGGACGAAGAATGACAGCAAAATAAAGTTTATGG
CACCATCGTAAATGGGCCGAAAACGAGTTGACCTGGTCCGCCGAAAGGGCTGTGCGCCGTT
TACTGCATTTCTTCTGCGAGCAAAGGATTATTTCCGAAACGGCTAATCCTCGCTGCGCG
AAAGAGATGGAGTGCATGTGCGAGTGCAGCCACTGACGCTGCAAACTCTTTCGCAACCT
TAAGGCCACCTCCTGGAATTTGAAATTTGATTTCGAAATCGCTCGGCAAAATCCCTATTT
TGGGTTAGTCCACCTTGTGTCGAGTAAATATTTGAGGTTTTGCGCTGCTTATGTGCCA
GGCAACGCTGGGTTTATTTGGGTTTCATCATCGGATCAGCAGGTACACTTCGA

```

Sequences are shown in FASTA format. For cis-elements mapped from the literature, references are given in the description line (Calhoun and Levine, 2003; Fujioka et al., 1999; Hiromi et al., 1985; Howard and Struhl, 1990; Klingler et al., 1996; Pankratz et al., 1990; Pick et al., 1990; Schroeder et al., 2004; Small et al., 1996; Stanojevic et al., 1991). The *prd\_+4* element drives the early *prd* head expression, similar to an overlapping element published previously (Ochoa-Espinosa et al., 2005).

#### References

- Fujioka, M., Emi-Sarker, Y., Yusibova, G. L., Goto, T. and Jaynes, J. B. (1999). Analysis of an even-skipped rescue transgene reveals both composite and discrete neuronal and early blastoderm enhancers, and multi-stripe positioning by gap gene repressor gradients. *Development* **126**, 2527-2538.
- Small, S., Blair, A. and Levine, M. (1996). Regulation of two pair-rule stripes by a single enhancer in the *Drosophila* embryo. *Dev. Biol.* **175**, 314-324.
