# Supplementary material
Source: PubMed Central journal article supplement (PMC3119311)
Supplement: supp_138.14.3067_DEV062141TableS3.pdf [file supp_138.14.3067_DEV062141TableS3.pdf]

**Table S3. Binding site predictions (Stubb integrated profile values) for pair-rule gene cis-elements**

| cis-element   | Length | Bcd | Cad | Stat | Gt  | Hb  | Hkb | Kni | Kr  | Tll | Slp1 |
|---------------|--------|-----|-----|------|-----|-----|-----|-----|-----|-----|------|
| eve_stripe1   | 801    | 1.2 |     | 0.8  |     |     | 1.9 |     | 1.6 | 0.9 | 0.9  |
| eve_stripe2   | 663    | 1.4 |     |      | 0.4 | 1.1 |     | 0.5 | 1.5 | 0.5 |      |
| eve_stripe3_7 | 511    |     | 0.9 | 1.8  |     | 3.1 |     | 4.3 |     |     | 0.4  |
| eve_stripe4_6 | 602    |     | 2.8 | 1.0  |     | 2.6 |     | 0.4 |     | 0.5 |      |
| eve_stripe5   | 800    | 0.5 | 0.7 | 0.4  | 0.4 | 1.0 | 0.5 |     | 1.7 | 1.0 |      |
| eve_late      | 1288   | 0.6 |     |      |     | 0.9 |     | 0.7 |     |     |      |
| ftz_+3        | 1745   | 0.9 | 1.8 | 1.3  | 1.0 | 1.4 |     |     | 2.1 | 2.7 | 1.0  |
| ftz_-1        | 1075   |     | 1.6 | 1.2  | 0.6 | 1.6 |     |     |     |     | 1.8  |
| ftz_-6        | 1240   | 0.8 | 1.1 | 0.9  | 1.8 | 2.4 |     | 2.7 | 0.7 |     |      |
| ftz_-7        | 1618   | 0.8 | 1.7 |      |     | 3.3 |     | 1.4 |     | 1.0 |      |
| ftz_zebra     | 1118   |     | 1.3 | 1.2  |     | 1.5 |     |     |     |     | 1.3  |
| ftz_autoreg   | 2241   |     | 1.2 |      | 1.3 | 1.7 |     |     |     |     |      |
| ftz_LacC      | 6489   |     | 4.1 | 3.4  | 3.8 | 6.0 |     | 2.8 |     |     | 4.1  |
| h_stripe1+5   | 2971   | 2.3 | 2.6 | 2.3  |     | 3.6 | 2.3 |     | 5.8 | 3.7 |      |
| h_stripe1     | 1286   | 0.9 | 1.2 | 0.9  |     | 1.2 | 2.0 |     | 4.5 | 2.7 |      |
| h_stripe2+6   | 1081   |     | 4.0 | 2.1  |     | 2.5 |     |     | 3.5 | 1.7 |      |
| h_stripe3+4   | 912    |     | 1.6 |      | 1.0 | 2.8 | 0.8 | 1.6 |     |     | 0.6  |
| h_stripe5     | 1674   | 1.4 | 1.4 | 1.4  |     | 2.3 |     |     | 1.3 | 0.9 |      |
| h_stripe7     | 1474   |     | 1.9 | 1.1  |     | 4.6 |     | 3.1 | 2.5 | 1.2 | 0.7  |
| odd_-1        | 1510   |     | 1.2 |      | 1.0 | 1.2 |     |     | 1.4 | 1.2 |      |
| odd_-3        | 1650   |     | 2.1 | 1.5  |     | 3.4 |     | 1.8 | 0.9 | 1.1 | 1.0  |
| odd_-5        | 1384   |     | 0.8 |      |     | 0.7 | 0.9 |     | 2.4 | 0.9 | 1.1  |
| odd_-10       | 5102   |     |     | 2.9  |     | 2.7 | 2.9 |     |     | 2.4 | 4.3  |
| odd_basal-1   | 2431   |     | 1.7 |      | 1.1 | 1.4 |     |     | 1.9 | 1.6 |      |
| run_-41_42    | 2323   |     | 3.8 | 1.2  |     | 5.8 |     | 1.2 | 2.7 | 4.0 |      |
| run_-31       | 2524   |     | 1.7 | 1.3  |     | 3.4 |     |     | 2.1 |     | 1.3  |
| run_-16       | 2519   | 1.2 |     | 1.1  |     | 1.9 |     | 1.2 | 3.9 | 3.7 | 2.4  |
| run_-17       | 997    |     | 2.7 | 0.9  | 0.9 | 4.6 |     |     |     | 0.5 | 0.8  |
| run_+19       | 2261   |     | 1.9 |      |     | 3.1 | 1.0 | 2.0 | 1.8 | 2.2 | 1.5  |
| run_+30       | 2709   |     | 1.6 | 2.3  | 1.9 | 3.5 | 1.8 | 1.5 | 4.5 | 1.5 | 2.5  |
| run_-3        | 1371   | 2.6 | 1.9 | 1.1  | 0.7 | 1.4 | 1.2 |     | 1.2 | 0.7 |      |
| run_-3_Kr-    | 1371   | 2.6 | 1.8 | 1.1  | 0.8 | 1.4 | 1.2 |     |     | 0.7 |      |
| run_-10       | 862    |     | 1.8 | 0.8  | 0.9 | 4.3 | 0.6 | 2.9 |     |     |      |
| run_7stripes  | 5092   | 3.8 | 4.5 |      | 2.4 | 6.4 | 3.1 |     | 2.6 |     | 2.7  |
| run_stripe1   | 1617   | 1.9 |     | 0.9  |     | 1.1 | 0.8 |     | 2.2 | 2.0 | 1.3  |
| run_stripe3   | 2315   |     | 2.5 | 0.9  | 1.3 | 5.4 |     | 2.9 |     |     | 1.8  |
| run_stripe5   | 1336   |     | 1.2 |      | 0.7 | 1.8 |     |     | 0.7 | 1.2 |      |

When predicting binding site strength, the use of a local background model and the adjustment of the probability of site occurrence for each factor by the Stubb optimization procedure means that an identical DNA sequence can score differently in different cis-elements. To ensure maximum comparability of binding site predictions across different elements, we therefore ran Stubb as follows: each cis-element was analyzed as a single window with only one transcription factor at a time; in each case, the probability of site occurrence was fixed at the same low value (0.0005), and the same zero order background model, generated from the pooled genomic sequence of all segmentation genes, was used. Stubb assigns each potential binding site in the sequence a probability from 0 to 1, and the integrated profile value is the sum over all sites, thus representing a robust predictor of the total strength of input.
