# Supplementary material
Source: PubMed Central journal article supplement (PMC3119311)

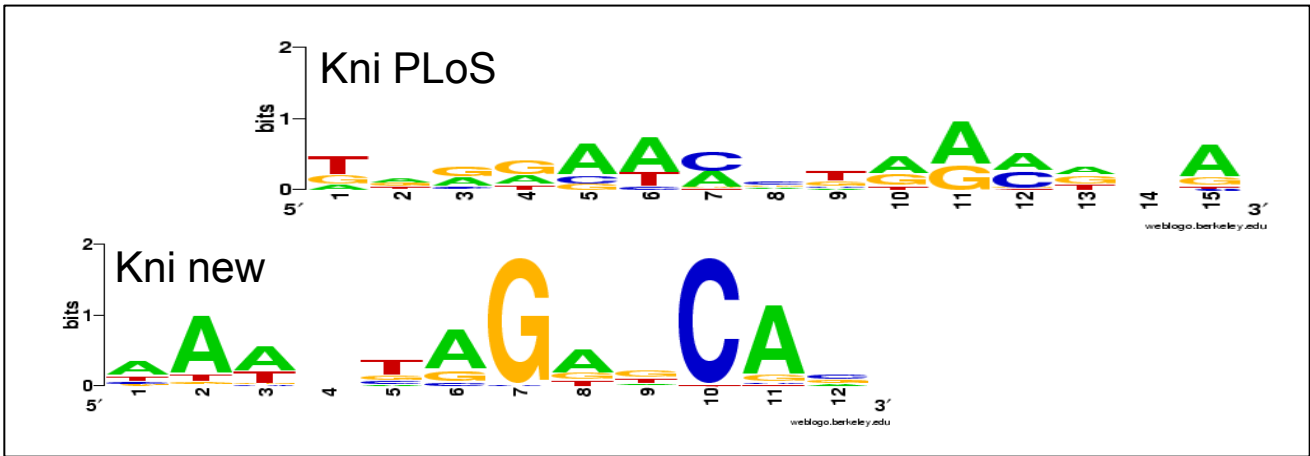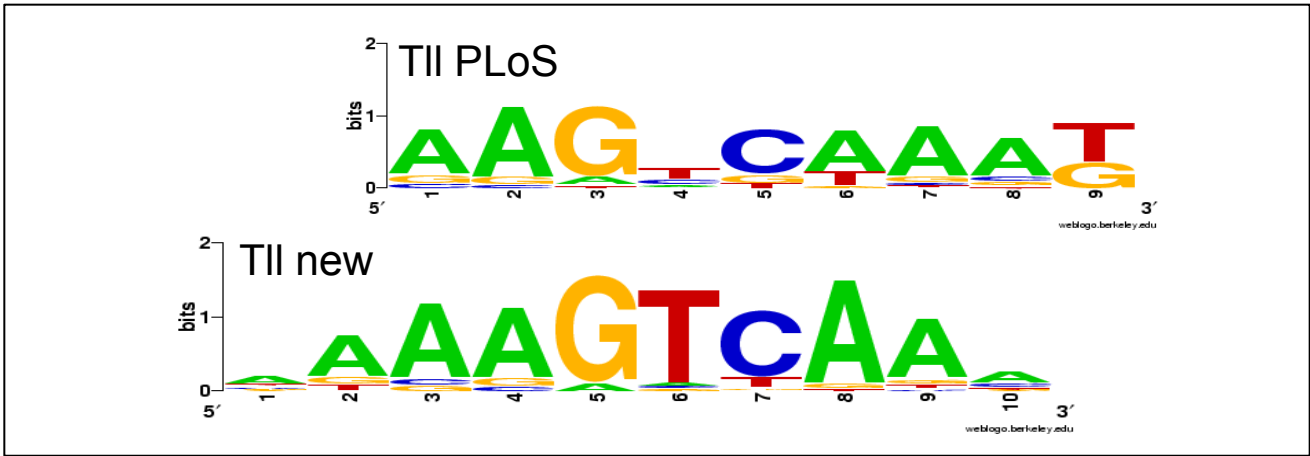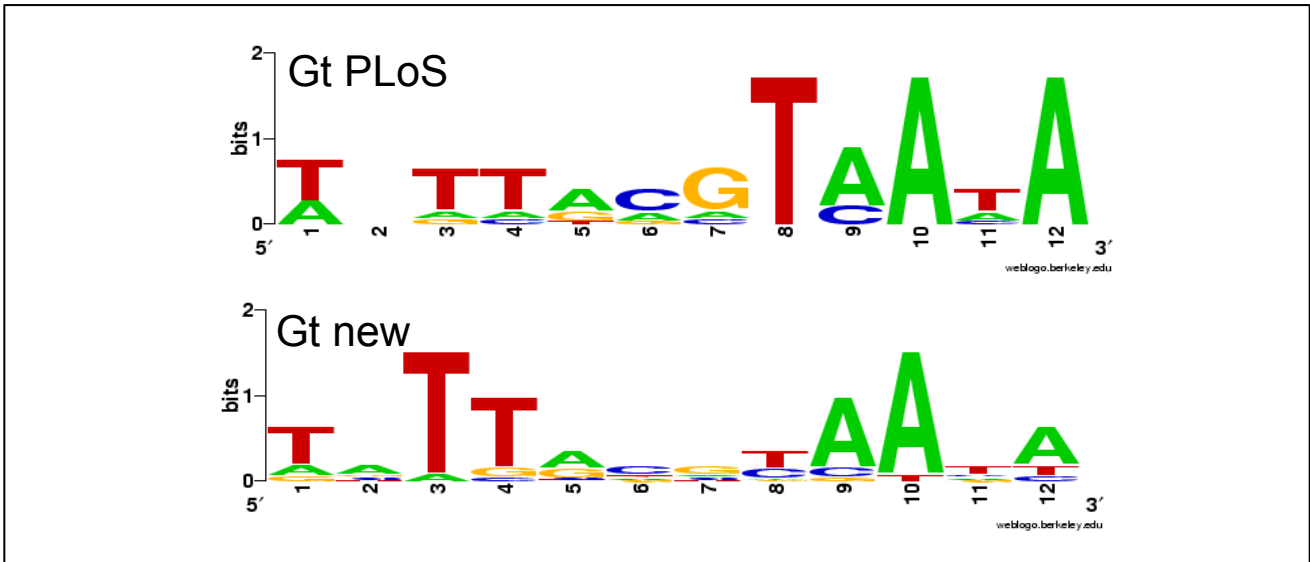

Supplement: supp_138.14.3067_DEV062141FigS2.pdf [file supp_138.14.3067_DEV062141FigS2.pdf]

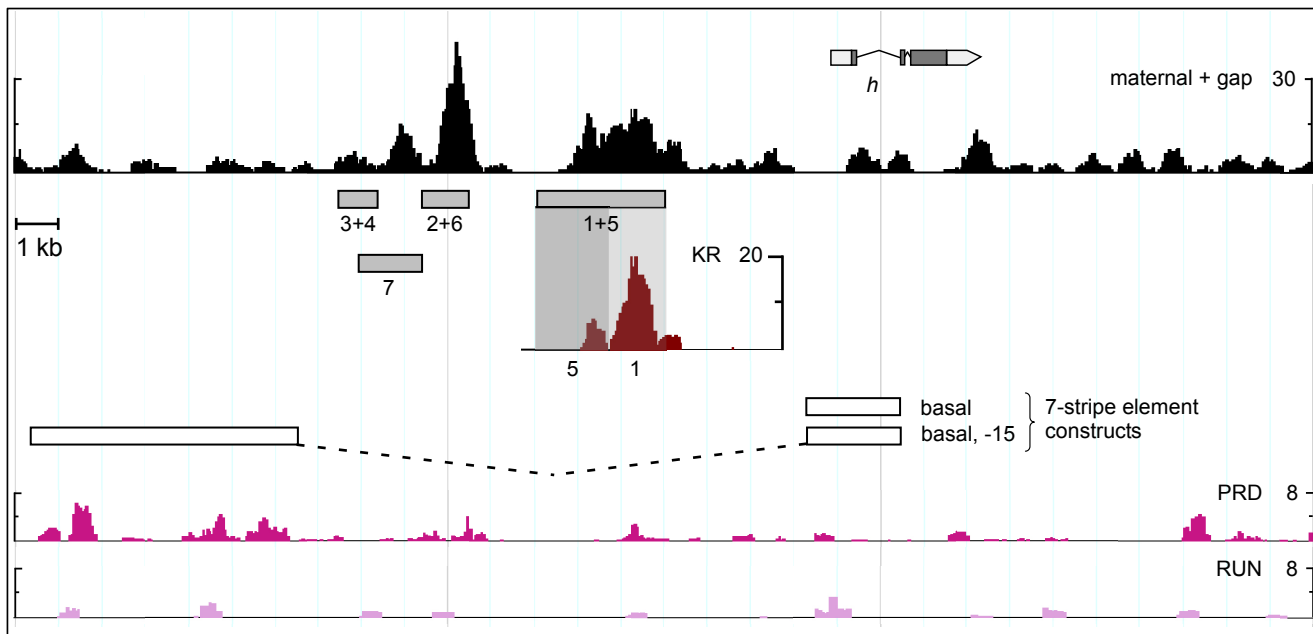

Supplement: supp_138.14.3067_DEV062141FigS3.pdf [file supp_138.14.3067_DEV062141FigS3.pdf]
